# Supplementary material for: Genome-wide identification and evaluation of constitutive promoters in streptomycetes
Source: PubMed Central journal article supplement (PMC4625935; doi:10.1186/s12934-015-0351-0), 2015-10-29
Supplement: 12934_2015_351_MOESM1_ESM.pdf [file 12934_2015_351_MOESM1_ESM.pdf]

**Table S1** Overview of all transcriptome microarray datasets of *Streptomyces coelicolor* used in the present work

| Microarray | <i>S. coelicolor</i> strain                   | Culture medium<br>(liquid) | Culture<br>temperature | Fermentation<br>vessel <sup>a</sup> | Sampling<br>number | Gene<br>number | Source               |
|------------|-----------------------------------------------|----------------------------|------------------------|-------------------------------------|--------------------|----------------|----------------------|
| GSE2983    | M145                                          | Modified R5 medium         | 28 °C                  | NA                                  | 10                 | 4960           | Huang et al. [1]     |
| GSE18489   | M145                                          | Fermentation medium        | 30 °C                  | 3-L Fermentor                       | 32                 | 8205           | Nieselt et al. [2]   |
| GSE30569   | M145                                          | SSBM-E                     | 30 °C                  | 3-L Fermentor                       | 30                 | 8205           | Waldvogel et al. [3] |
| GSE53562   | M145                                          | SMM                        | 28 °C                  | 250 ml Flask                        | 7                  | 7729           | Our lab              |
| GSE44415   | M145                                          | AM media                   | 37 °C                  | NA                                  | 13                 | 7715           | Strakova et al. [4]  |
| GSE30570   | The <i>glnK</i> mutant<br>(SCglnK-3) of M145  | SSBM-E                     | 30 °C                  | 3-L Fermentor                       | 16                 | 7,893          | Waldvogel et al.[3]  |
| GSE31068   | The <i>phoP</i> mutant<br>(INB201) of M145    | The same as GSE18489       | 30 °C                  | 3-L Fermentor                       | 36                 | 7,893          | Thomas et al.[5]     |
| GSE53563   | M145 and its <i>scbR2</i><br>knock-out mutant | SMM +/- jadomycin B        | 28 °C                  | 250 ml Flask                        | 1                  | 7,729          | Our lab              |

<sup>a</sup> NA indicates the fermentation vessel is unknown from the corresponding reference.

#### Reference

1. Huang J, Lih CJ, Pan KH, Cohen SN: **Global analysis of growth phase responsive gene expression and regulation of antibiotic biosynthetic pathways in *Streptomyces coelicolor* using DNA microarrays.** *Genes Dev* 2001, **15**:3183-3192.
2. Nieselt K, Battke F, Herbig A, Bruheim P, Wentzel A, Jakobsen O, Sletta H, Alam M, Merlo M, Moore J, et al: **The dynamic architecture of the metabolic switch in *Streptomyces coelicolor*.** *BMC Genomics* 2010, **11**:10.

3. Waldvogel E, Herbig A, Battke F, Amin R, Nentwich M, Nieselt K, Ellingsen TE, Wentzel A, Hodgson DA, Wohlleben W, Mast Y: **The PII protein GlnK is a pleiotropic regulator for morphological differentiation and secondary metabolism in *Streptomyces coelicolor*.** *Appl Microbiol Biotechnol* 2011, **92**:1219-1236.
4. Strakova E, Zikova A, Vohradsky J: **Inference of sigma factor controlled networks by using numerical modeling applied to microarray time series data of the germinating prokaryote.** *Nucleic Acids Re* 2014, **42**:748-763.
5. Thomas L, Hodgson DA, Wentzel A, Nieselt K, Ellingsen TE, Moore J, Morrissey ER, Legaie R, Consortium TS, Wohlleben W, et al: **Metabolic Switches and Adaptations Deduced from the Proteomes of *Streptomyces coelicolor* Wild type and *phoP* mutant grown in batch culture.** *Mol Cell Proteom* 2012, **11**.
