# Supplementary material for: Genome-wide identification and evaluation of constitutive promoters in streptomycetes
Source: PubMed Central journal article supplement (PMC4625935; doi:10.1186/s12934-015-0351-0), 2015-10-29
Supplement: 12934_2015_351_MOESM5_ESM.pdf [file 12934_2015_351_MOESM5_ESM.pdf]

Table S2 The 500 bp upstream regions of the 166 genes with stable expression profiles

| Genes   | Sequences (5'-3')                                                                                                                                                                                                                                                                                                                                                                                                                                                                                                                                                   |
|---------|---------------------------------------------------------------------------------------------------------------------------------------------------------------------------------------------------------------------------------------------------------------------------------------------------------------------------------------------------------------------------------------------------------------------------------------------------------------------------------------------------------------------------------------------------------------------|
| SCO0068 | <p>G TTCCTGTCCTACGCGCACACCTCGTCTACGACACCCAGACCCGGTCTGGTGCTGATCTACACGGCGATCGCGGTCCCCT<br/> TCGCGTTCTTCGTCATGCGCAACTACGCCCTGACGCTGCCGCGGGAGGTCTGGAGGCCGCCGCATGGACGGTGCCTC<br/> GTGGTGGCGGGTGTCTGGCAGATCCACGTTCCGCTGACCCGCTCCGCCATGATCGCCGTGTTTCGTGTTCCAGTTCGTGG<br/> CCGTCTGGAACGACCTGATGTTTCGGCATCACCATGGTCACCAGCCGCAACATCCGCCCCGTCATGGCCGCGCTCGCCGAC<br/> CTGCAGGGCAACTACTCCAACGTCCGGGCCGCCCATCGTCTTGGCCGGTGCCTCCTGGTGTGCTGCGGACCGTGGTGC<br/> TGTTCTTCTCCGCCAGCGCTTCTTCGTGAGCAGCCTCAAGATCCACCGCTGAGCCCGCGTGCGCCCGCACCTCCCCCGT<br/> CATCGTCGCGAAGGGAACACCC</p>       |
| SCO0069 | <p>ACCGCGGCGACGACGGCAGCACCAACGAGACGCTGTGGACCTACAACCTCGGGCGCCATGATCGGCACCGCCACCGCGCT<br/> CTACCGCGGCACGGGTGACGCCCGGTACCTGGAGAAGGCGGTGGCGGACGCCCGCGGCTCCCTGGCGTACTGGACCGG<br/> GGGCACCCGCGCTGCACGACCAGCCGGCCGTGTTCAACGCCTTCTACTTCAAGGACCTGCTCGACCTGGACGCCGTCCGCC<br/> CGGACTCCGCCTATCTGTGCGCCATGAGCGCGTACGCCGACAACACCTACCGGTCCAACCGGGACGCCTCCAGCGGCCT<br/> GTTCCGCTTCCAGCCCTCCAACGGCGGCGACTACGACCCCGCCGCGCCGGCCGCGACCCCTCAACCAGTCGGCCATGGTC<br/> CAGATCTTCGCCACCCTCGCCGACGCCACCCGCCGGGACCACCGGACTTCTGACTCGGGCGGACCGCGCCGCGCTCCC<br/> CTCGACGCAAAGGACCTTCACGCACC</p>   |
| SCO0119 | <p>GCAGAATCCCCTCTCCAGCTCCGGGTCCGACAGTGCCGTCGTGCGCTTCTCCCGACGTACGGAGCGGTACAGGCCAGC<br/> ATGTCCGCGCCTTCTCCGACGCGTCGGGCGGCCGGGCGCTCCTGACCCAGTGCCTCTGGCTCACCGGCGCGTCGGCG<br/> GCGGCATTCTGGTCTTCCGCCGACGTACCCGGAACGCGCTCGTGCGGCACAGGAAGCCGCCGTTTCCGGCGCCCCGCG<br/> GCGCTGGAGGAACCGAGGGCCAGGCGTTCACCGGCCCCCGGCGGAGTCCGGCCCGGCGCCGGAAGGGTGGGACCC<br/> GCCTGACCGCCCGGCTGCCCGGGGCGCTCGGGGGTCCGCCCATCGCACGGACGGCCATCGACCCCGTGTGCGCCC<br/> CCTGTCCCGCCGATACGCCCGTGACCTGGGCAGGCGGTGATCGTTCAGCTGTGCGGGCGCTGGATCGGTGCCCGGAACGA<br/> CCCGTTCACCACTGCAAGGAGCACCGCCCC</p>            |
| SCO0123 | <p>CGGACGGAACACACCCATTGATCCGTCTGACCACCCGAACGGAGGATCTCGCTCGACCGTGGGTGCCGCCGGTGCACG<br/> CCGCTCGGGCCGGTCCCTCTTTCCGTGGAACCTCGTCACGGTGCACCGGGATCACACCCTCGGAGGCCGCGCCCCGGGAC<br/> ACGGCCGCGCGCGCCAGGCGTCGGAGGCCCGCCGCGGCACGGGAAAACGAGGCCCCGAGGTGCGGAGAGCGGGTGGG<br/> CGGCGACCGGCGCGGAACCGTCCGGTACCCGCCCGCGGAGCCGGGACGGGCCACCGCAGCCGGCCGGCGCAGCCCCG<br/> GTCGCCGGTTCATCCTGGTGTGAGCCGCCGGTCCCGGCAGCGCGACCGGCTCGGGTGGGTGGGGCGCCCGGCCATTGGATT<br/> CCCCGCCCTTCGCGTGCTGCCGTACCTCTGTCCACCAACCGGTGGTTCATCGCGACCGCCTCGGCCCGAACGGGAGCCCG<br/> CACCCGCATGCCCGATTCCGAGCAGTCCACC</p> |

SCO0265 ACTGGATCCCATCGGTCTGTGGTCCGCCTTCAAGCGCGCCCACGAGGTGGTCCGAACCCGCGTGATAGCCGACGCCGCG  
GAGGCGGGCGGGCCTCTCCGAGCCGGACCTGACCATCCTCGCCGACCTCAACAAGGCGGGAGGCGCCTTGCGCCAGAGC  
GAACTCGCCGCGTCGCTCGGCTGGGACCGCACCCGCGTCTCCACCAGCTCACCCGCATGAGCAAGCGCGAACTCGTCA  
CCCGGGCGGGCGGCCAACGGCGTGATCGTCTGTTCTCACGGACGCCGGGCATCAGGCCATCACCGCCGTGTACCCCGGCCT  
GGACGCCGCGGTACGCCGCCACTTCACCGACAAGCTCTCCACGCAGGAGGTGAAACACTGGCCGCCGTCTTGACCGG  
CTGTAACCGTCCCGGCCCCGCCACCACACGGTGTGCCGGCGCGACGGGCGAGAGTCACCACGGAGTGTACGCTGGATC  
ACACAGGAAGTGCAGAAAGGGAACGTCC

SCO0267 GGCCGCGCGCCGCGTCGACGAAGGGCCAGTCGGCGGGCGGGGACGATCCAGTGCCTGCCGGGTGGGGGAGGCGACG  
AGTTCGCGGGTGGCGTGGGTGACGGGAGCGGTGCGCACGAACAGTACGAGGTGCCCTCCACCTCGGCGACGTCTCC  
CACCGGTGCACCGCGCCGGGGGAATCCACACCGCGGACCGGTCTTGAGGGGGTGGAGGCGGAAGTCGACCGTGACG  
GAGCCGCGTCCGGCGTCGACGACGGCAAGGACGTGGAAGTCGGCGCGCTGCGTGCCGCCGTCTTCAGCTCGCGGAGG  
CGGCCGAACGTCATCGTCTGACCGAGGCGGGCGCCGCGGGGGGCTGGTAGGTCATCTGCCGGATCGCGCTCACG  
TGTCCAGTTTTACCATCGCGCGACCGCTCACGCCGATGCCCGGTCCGGGTGCGAGGGGTTGATGGACACACGGGGCA  
GCCGCCCGGGCATCGAACGAGAAGAGCCATC

SCO0285 AGAGCGTGGGCGAGCGCGGGCGCCGGCGACGGCAACCCGATCACCATCGGCGGCACGACCTTCGCCAAGGGACTCGGCG  
TCCACGCGTCCAGCAGCGTCGAGTACTACCTCGGCGGCACGTGCGGCAAGGTGACCGCGCAGGTCCGGCGTCGACGACGA  
GTCGGGCGACAAGGGCACCGTGGCCTTCGAGGTCTGGGCCGACGAGACCCGGGCCGCGTCGACGGGCACGCTGACCAA  
CGCCGATCCCGCCCGCGCGGTCTCCGCCGACGTCTCCGGCGCGGACATCGTCCGACTGGTGGTCACGGACGCCGGAGA  
CGGCAGCGGATACGACCACGCGGACTGGGCGGACCTGCGGGTCACCTGCACCTGAGTCACCTGGCGCGCCGCTCCGGT  
CGCCCTCGCCCCGAGCCGGAAGTCGCACGGTTCGGACCGTTCCGGTTGGTGCCACTCAGCGGTCTTCCGTGTCAGGTGGG  
AGAGGGCTCCGGGCGAATGGGGCCCCGAGCA

SCO0295 CCGCCCGCCGGCCCTGCAGGCCGCTGCTCGACAGCGCGACCGCCAGGTGCAGTACCGCCGGACCGTCCGGGCCCGGTGA  
TCTCGCGGGCCACTTGGGCCGCGTACGTACGCAGGTGCGCGGCGAGGCTCCCGGTGTCCGGCATCGGGGACCGCGCGT  
TGAGGCGGGTGGAGCGCCACGTCCGTGAGCAGGGTCTCGAGGCTGCCCCACCGGCGGTAGATGCTGCTGTCCGGCCACGC  
CCGCGCGGTCCGCGACGTCCCGACGGTGAACCTGCCGTAGCCGCGCTCACTGATCAGATCGGTGACGGCCTGGTGTAC  
CTGCGCTCCGACACGGGCACTGCGCCCCGCCGGGCCGGGCTCGCTGTTGCTCGTTTCATGCCCCACCTTAACGCAGT  
CAGTACTTGCGTTTTGCGGGGGAGCCTCCCTATAGTCTGCTAACGCAGTCACAGACTGCTTTAGGAGCGCTCGGATGGCCG  
GGCGCAGCCAACGACGGAGGGGGATCCC

SCO0301 TGGATGCCGGGGTAACGGTTCCAGTACCAGGTGCCTCCGAAGTCGCCGCCCTTCTCGACGACGCGGACGCGCGCGACCC  
CCTGCTGACGCAGCCGCGCCCCGCGAGGACGCCGCCGAATCCGCCGCCGACGACCGCGACGTCCACCCGGTTCGCGCA  
CCGGTTCGCGCACGTCCGACTCCCCGCCCAGGGGTTCGGCGGCGTAGAAGCCGAAGTTCGGCGTCCGCGCCGAGGTACT  
GCCGGGTGCCGTCGGGGCGTACGCGTCGCTCCCGCTCGCGCCGGTACCGCTCCCTGAGTCCGGCGAGCGCCTCGGGTG  
TCAGCTCCTGTGCATGTGCCATGTGGGGGACCGTGTTCCCTTCGCTTCGCCGTTCAGGAAGCCACTCGTCCGTGAATCGGA  
CTGGAACAACGGGACTTGAGCAGCCATGCACTACGGTAACAAGAACC GGACAAGGTTGTCCGGTTGGCTGCGGGTTGCT  
TCCGCGTACTTTCCGACAGGAAGAGTG

SCO0304 CGCGCTGGAGCTGTTTTCGCGAGTGGCGCGTTCTTGCTCTGGCTGTACGAGATGAAGGCGTCGCGCTGCTTCGCACCGAC  
CGGCTCCACCGCTCGCGCCTCGGCCTCTTCCACGGCATCGCTCATGGCGTCCCCCGTGCCCCCTCCGCATGTACCTGTGG  
CCCCGACGTGCGGCACCAACTCCACTGCCTATCATGCCCGTTGTGCCCCACGGGCTCACCCGCACCACCGCGCCCCGA  
CCACGACCACGACCGCGGCCGCGCCGACGGTTCGCCGACCGCCCCGGGAACGCTGACCACCCGCCCACCGCCCCCTCTC  
TCGGGACGACGAGCAGGCCACATCGTCCGCCGAACGGCTTCACGCCCTTCGCCGTCTCCCTCGCCCACCGACCCGCAT  
GCGGCGGGTGCGGCGTTGTCCGGGCCGGCAGACGGTTTCGCCGATGAGTTCAGTCTCCTCGAACGGTCTCACCCAGCG  
ACCCGACCGTTCCCGACAGGAGTGCC

SCO0309 CGGGCGGGCGCTGCGGGAGTTCACCGAACTCATCCGCTCGCATGCCGAGATGGCCTTCCGGGACCGGGCGCGGCAACT  
CGGCGTGGAGCCCAGGATCCCGCTCGGCATCGTCGCCCGCGCGTGGACCGGAGAACTCATCTCGGTGCTGGGCTGGTG  
GGTCGAGAACGACACGGGTTACACCGCCGAGCAGATCACCGCCACCTGCGGGATCTCTCCGTCTACGGCAGGGTCTGG  
GCCACCGGGTGAACCCGGTGGACGCACCCGGAGCCGTCGACCTCCCCGGGGGGCGGGGCGCCGAACCCGTGTAGTCA  
CGCCCCGGCGGCCGACCCCTTCCGTTTTCCGAACAGCGTGTACGGTATCGATCTCGCGATGAGCTGATTCCGAACGAG  
CGGAGCGACAGGTGACCGGCACGGACTCACTGGCCTACCTCGTCTGGGCACGAGGATTCACGGACTCGGCCTGGGCACG  
ACGACACACGACGGCAGGCCGGGAGATC

SCO0322 CGCAGGGATTCGCTGCGGCCGACCGGCGCTCAGGGTGATGGCGCCGGCGGAGGCGAGTGCCAGGGCGAGGGAGGCG  
AGGGCGCTGGTCACGATACGACGAAGGGGCAAGGGGAGCTCCAAACGGTGGGGGATCGCCAGGCGGGACTGCCGCTGT  
CTGCCGATCCGTTGTTCGATGCGACGCCAGACTCACAGCATCGGCGCGGGCGCTCTGAGCAATGGCGGCGCCGTTACC  
CGGCGTAACGATTCAGTCTGCGCCGATCAGTTGATCTCCACCGTTACGGTGCACCGCGCTCGGGGGCGCACCGACG  
AACAAGGCGAGACGTATCGTCTTGCCAATGGGTGCGGCGTGGCGTACCGTCTTGGCATGGGTTCCCTGTGAGATCACCG  
GCGCCGACGGCGTAGAGCACCGCTCCGCCGTTCGCCGCGCCTCGCCGTGCCGTCCACCCACCCCGATCCGGCCCCGGGCC  
GATCCCGTGCGGCCAGGAGGGACCCGATC

SCO0329 CAAAGATCCACCTCGCCTGCGACGGTGAAGGCCGCCCTGGCCTTCACCCTCACCGCCGGCAACGTCAACGACTGCACC  
CAGTTCGAGCAGGTCATGGCCCGCATCCGCATTCAGCGGTGCGGACCCGGCAGACCCAGAACCAGGCCCGAGCGGGTCCG  
CGGCGGACAAGGGCTACTCGTCCACGAAGATCCGCACCTACCTGCGACGTGCGGGCATCAAGGCGGGGATTCCCGAGCG  
CATCGACCAGATCAACGGCCGCATCCGCAGGGGCGAGAGCCTCTGCCGACTCGACCGGGCGGCCTACCGGCGACGCAAC  
GTCGTGAGCGCTGCTTCAACAAGCTCAAGCACAACAAAGCCCTGGCCACCCGCTACGACAAACGCGCCCGTCACTACCA  
GGCCCTGGTCACCCTGGCCTGCCTCAAACCTCTGGCTACCCTGACTTTGCGGACACGACCTAGAGACCGCCACCGGTACGG  
GCCCCGACGGAGGAGGCGACACG

SCO0341 TGGACAGCGGCGACATGGGCGCCTTCTACACCTACGGCGTCAACAACGTGAGCCGTACCCGATGGACAACCACGTGCGC  
CAGATGGTCGTCGGCGACGTGATCCCGGACGAGTCGATGCCCGACAGCGGCACCCGGGGCATTACATGGACGCCGGCG  
GCTGCGGCTTACCTTCGAGGACATCGAGGTGGGCAGGACCACCGACAGTCGTACCAGAGCTACCAGTGCAACGACGT  
GAAGAACCAACTGGGAGGACGGGTACGACGCCTCCAGGATGGAGTACGACAAGATCGGCGTCACCGCCGGCTTCCC  
TACCCGCTGCCCGACGGGGACACCCAGTGAGCGGTGCTGACCGGTGCGCCCCCGGCGAACACCCCGGGCAGCGTGC  
CGCACGAGCCGCTGCCCGGGGTGCGGTGGGCGCGGGCTCCCGGACCCGCCCGCGCCCGGCACAGAGCATTGCGACCG  
CCCTCGACACATGCCTGGAGGCTTTGCC

SCO0371 GGGCCCCACCCACGGCGCCCTCCTGGAGCTGGGTGCGGTCAGCGACACCTTCCGGGTGAGCGTCAACGGCCGTGACGC  
GGAACCGGCCGACCGCCTCGACCCCGTCTGTCGACGTGGGCCCGCTGCTGCGCCGCGGCACGAACACCATCGAGATCGA  
GGTCGCGACGCCCTCGTCAACCGGCTGAGGGTGAAGCCCGGAGGTCTTCGAGGGGCTCGCCCGCCAGGAGTACGG  
GCTGGTGGGACCGGTGCGACTGGTTCCGTACGCGCAGAAGACGGTCTGACTCCACTCGAATTGAACGATTCAAACAGCG  
CGGACGGTGCCGAGGCCCGTCCGCGCCGGGTCATGCCCGTTCCGCGCCCGGTGACTCGCGGTTCCGAGGGACTTATGG  
CGCGTCAGAAGGTTCTTGTGGGAACCCTTGACGCTCCTGGTGACGCCACTTAGCGTCTCCGGAGAATCGAGTAAAACGATT  
CAATCGAAGGGAGCTGAGCCCCGCACC

SCO0373 GGCGAGACCGGTGAGCACCTGGCAGCCGAGCAGCAGCTGCACGGCCCGCCGGTCCGTCCGCCACGACAGCCGTGCGAT  
CCGGCCCAGGACGGCCGGGATCTGTGCGCACATCCGTGCGAAGGAGACCTCGGCGAGCGGATTGACGGAATACCGTCCG  
CTGTAGGTGATCTCCGCCGGAGGCGGTGGAGGCGGTGGAGGCGGTGGAGGAGGTGGAGGCGTGGGTTTCCGCGGTCCG  
TTCGCGGCGGTGAGGTCAATGGATCCCCCTTGACGGTTCGTTGAGCGTGGTCGTGAAGCTCAACGACCGGACCGAGGTAT  
CGAACACATGTGTTTCGGTCGCGGTGAGGGCCCCGAACCACGGCGCGTGTGTTTTCGTGGCGGATGCACGGACCCGTGC  
GGGACAACAGGGGTGCGGAGCGGGTAGGTTGGCCGAATCGCCGACAACCGCCCGCCCGGCGGTGGCCGGACGCCGGG  
AACGATGCGGCGGTGCAACCGCCAGGCCG

SCO0444 TACAACGGCGGACGCGACGAGTTCGGCCGGCAGGTGCGCAACCCGGCCGGCATCGACCTGGCCGACGGCACCTTCTACA  
ACGTCGGCCTGAACGACAACGGCTGGGTGACCGTCACCTACCTGTGGACCGAGGGCGGGCGGACACCACGTCTTCCC  
GACCTGGGGCACCGACGTGAGCGTGCGGCAGCGGGCGACGACCGACTCCACCCGCGTGGCGAGCCTGCCCGGGCCCAC  
GACCGTACGGGTGCGGTGCCAGGTCCACGGCCAGCTCGTGGACTACGACGGCTACAGCAACGACGCCTGGTTCGTACCTG  
CCCGACTACGGTGGCTACGTCTCGAACATCTTCATCGACGTGGCCGACTCCTGGCTCCCGGGCGTGCCACCTGCTGACC  
GTCGGGCAGCGCGGACCCCGACGCCGCCACGTGCGGGCGTCTGACTCGTCCACCAGGGCCCGGGGGCCGTGCGCGGAAG  
AGGGACCGCTGCCACGCACAATGGGCGC

SCO0453 ACCGACGAGCAGGTGCGGGACTTCCGGGTGGTGCCCTGCGCGGTGTGCGGGCGGGTCTCAAACCGGACGTGGTGTCT  
TCGGCGAGAACGTACCGCCGCGCCGCGTTCGAGCACTGCCGCGAGCTGGTTCGCGGGTGCCTCGCTGCTGGTCTCTCG  
GCTCCTCGCTGACGGTGTGTCGGGGCTCCGCTTCGTCCGCCAGGCGGGCGAGGGCGGGCAAGCCGGTCTGATCGTCAA  
CCGCGACGCCACCCGCGGGCGACCGCCTGGCCGTCACCAGGGTTCGCGCTCCCGCTGGGACCGGCCCTGACCACCGTGGC  
GGACCGGCTCGGCCTCCGTGTGGGGGACGCGGGCAGCGCCTGACCAGGCGAGCCCGCGTTCGCGCACGGGACCGGAAATC  
TCCCCGTGCCACCCCTTGACCGTGGTCCCGCCACTCCATACAGTCTCGCACCTCACGAGGTACATCGATTAACCAATCG  
TTAACCGCTTGGTTGGAGACCACCCCT

SCO0468 CCTCGGCGTACGCGGTACTCTGCGCGCCCGCGTTCGGCGGGATGCGTGGTGGCCTCCGCGAGGGCCAGCGCGGGCGCGTT  
CCCTGGGCGAGAACAGCTCGGTGTGCGGCCAGGCCGGCAGCACGCCGAGCCGCTGGGTGGTCTCGCCGCCGCGCAGCG  
CGGCCCTGGTGTGCGCGTTGAGGCAGTAGGCACAGGCGTTGAGCTGGGAGACGCGGATGTTGACCAGTTCCACGAGGAT  
CCGGTCGAGCCCGGCCGCCTCGGCGACGCCCGGACCGCCTCCGCCGTGGCACGCAGTGCCGCGTAGGCCTCCGGGCT  
CTGCTTGTGACGAACACACGTCGTTCCCGGTGCTGCCGGTGTACCAGGGGCGCCTGCGTTCGGCGCGTACAGGCGTC  
TGTGTCATGTGGGGTGTCTCCGTGCGCGGATAACGTTTCTCACGTCCTATCATCGAACCATAGAAGTTGAAACTGAAACTT  
TCAGGGGCGAGTGGGAGGGCCGAGCG

SCO0481 CCTCTTCGACGCGGAACACTTCCCGGGGATCTCCGGCTACGAGGCCGCGGAGACCACCGACGAGAACCCCGCCGCC  
CACGTCGCCGTGGTCCGACGGGTGCCCTGGCCCACCTCCGCCACACCCTCGGCGTTCGACAGCACCGACTGGACGGCG  
GCGCGCAGGACCCTGGCCGGAACGCCCCATCCCTCGGCCGACTCGAAGCCGAGTGAGCCCACTCCGCGAGACAACCC  
CGCAACCCCGCGCGACGGACACCGCGTTGACACACTCTTGACACGGTCACGTCGACCGCTTGTATGGTCTAGTCCAACA  
GAACTCGCCGCTCCGTTTACGGAGTTGAGCCCTGCCGGGGGTCCCACGCCCGGGCGGGGACGGTGAGTGCGCGTCACT  
TCGCGCCTCCTGGCCCCACCCACGAGAGGCCGTACTCGGCGTTCGCGCGGGTCCCCCACACACGGCCGCGCGTGCCT  
GGGACGGCCGGATGTGAAGGAGTTCCC

SCO0483 GCTGCGTCCGGACGACACCGACGGCATCCGGGCCCGGCTCCTCGCCGAGTACGCCGGCTGGTCACCCCGGATACTCCG  
GATGATCACCGAGAACGACGGCCCGTACGTGACCCGTCCGCTCTTCGCCCTGCCGGTGCCGCACACCTGGCGGCCACG  
CCGGGCGTGACCCTGCTGGGCGACGCCGCGCACCTCATGCCCCCGCTCGGCGTCGGAGTCAACCTCGCCATGCTCGACG  
GCGCGGAACTCGCGCTCGCCCTCGCGGGCTCCGCCACCGTTCGACGATGCCGTGCGCACCTACGAGAAGACGATGCTTCC  
GCGCTCGGCCGAGATCGCCGGCATGCTCGAGGGCGGTGCCGGCTTCTGCTGGAGGAGCCGGACGCCGAAGACCTCGC  
GCGGCTCGGTGCGCCCGGAGCGGACGGCGGACCCGGCGAGTGACGCGGGCCCGGACCGCTGTGCCTGCCCGGGGAGC  
GGGGCCCGCCCGGCCGGTAGGGTCGAGCCC

SCO0511 CCTCGAAGCAGCGCCCGGTGACGCCCTCCACCAGTGGGGACGCGGGCCGGCAGCACGGAGGTCGCGGGCGTCCTGGAGGG  
GCGTCTCGCAGGAGGGCCGCTCGATGACGTTCCCGTCGTCTCCACCGCCCCAGGACCCGCATCGTCGCGGGCGTCGAGG  
TGCCGCTGGAGGCTGGTGCCGATCCAGCGGGGTTGAGCGAGTTGGCGGCGATGCGGTGCGGCACCCAGTGGCGGGCGT  
CCACGGCGAACAGGACGTGCGCGGTCTGGACTGGGCGCAGGCGGCCAGCGGTTCGGAGCCTGCCGCCCGCGGGCTGC  
CTTCACACGGGTACCCGGCACCTCTTCGCGCGCGTACCGCCACCGGCACCGTACGGGCTGACCGAACTCTTTTCTGGACT  
TGCCAGTCCATTTTATTCGCCGCACAGTGGCATCCGCGCCCCGGCCGTTCGGCCGGGGACGACGGAGAAGCACACGGCTG  
AGACGGCAGGCGAGGAGCAGGACATGTCCG

SCO0541 GACGTTCTGGTGATGAAGAAGCTCGGCCCTCATCGACACCCTGGGCGCGCTGATCGTGCCGTCGCTGGTCACGCCGTTCCG  
CGGTGTTCTGCTGCGGCAGTTCTTCTCTCGCTGCCCAGGGAGCTGGAGGAGGCCGCTGGATCGACGGCTGCTCCCG  
GCTGCGGGTGCTGTGGCGGATCGTGCTGCCGCTGTCCCGTCCGGCGCTGGCCACGGTGGCCGTGCTGACCTTCTGACC  
ACGTGGAACGACCTGACCTGGCCGCTGATCGCCATCAACCACGACACGCAGTACACGCTGCAACTGGGCCTGACGACGTT  
CCAGGGGCGAGCACACACCAGTGGGCGGGCCGTGATGGCGGGCAACGTCATCACCGTGCTGCCGGTCTGCTCGCCTTC  
CTCGGCGCGCAGAAGACCTTCATCCAGTCGATCACCTCCAGCGGACTCAAGGGCTGACCACCCGCCCTCCGTCCGCGGCC  
ACCCGCAACGGAAAGAACCCCGC

SCO0554 CTGGGCCCGTGAGGCACCGGTCAAGACCCAGTCCCGGATCGACACCCCGAGGCCCTTCGCCCGGCCGAAGGCGGGCAC  
CGTGATGGTCGCCGGAGTCGCTGGGCCAGCACCGCGGCATCGACAAGGTGGAGGTCCGCGTCGACGACGGTCCCTG  
GGAGGAGGCCGTCTGGCCGCCGAGGACTCGCGCGACACCTGGCGACAGTGGTCGTACGCTGGCGTGCCACCAAGGG  
CGGCCACACCCTACCGTGCGGGCCACCGACCGGACCGGCGAGGTGCAGACGGACAAGCGCACCCGCACCGTGCCCGA  
CGGCGCCAGTGGACGGCACTCGGTGGTGGTGACCGTGGACTGACGCCCCACCGGGCGGCAAGCGTTTTCTGTCCACTGT  
ATTGACGTGTACGCGCCGTAGTGAGTTTCATGGGGTAGACGTGGGAGCGCTCCACACATGCGCCGTTCCCGGTTCCCC  
CATCCGCACTACTCAGCCCTGGAGTCGCC

SCO0562 TCGTCCGAGGCGGTGACAGAGGGCGCGTCCGCCGACGGCGCAGTCCGACGTCGGCGAGGGCGCCGCAGGACCGGCACAG  
GACGTGGTGGTGGTTGTCACCGACCCGTCCCTCGAACCGCGCCGGGCTGCCGGGCGGTTTCGATACGGCGCACGAGCCG  
TGCCGCGGTGAGGGCGTGCAGGGCGTCTACACGGCCTGGAGGGAGACGTGTCCCACGCGTCGGCGCACCCCGGAGGT  
GAGGGCCTCGGCGTCGAGGTGGTCCCCGCCCGGACGGTCTCGAGCAGCGGACACGGGCGGCGGTACCCCGCAGTCC  
CGCCCGGCGCAGCTCGTCGGCGGTGGCCGGTTTCCGGGAGTTCCGGGATGCCGTCATGGCGGCGAACCTACTCCCTGG  
GACACGAACGGCTCAAGGAAACGAACGACTCCAGCGTGGTAAACAACGTGCGTGGCGGGGCACTGGCAGGTGATGCCGCC  
CCGTACGGCACGACGACAGGAATGAGTGGCCG

SCO0594 GTAGGTCCAGGCCCTGGCCGGGAATGGTGTAGCCGATGTCCGCGAGGCCGCCGCGATCTCGCTGATGACGTGGTGGGCA  
CCGTCCTCGTTCCCGGTGACCAGGACACCGGCGACGCGGTTGTACGCGACCGGACGGCCCTCGTCGTCGGTCTCACCGA  
GCATGGCGTCCATGCGTTCCAGGACCCGCTGGGCCACGGAGGAGGGGCGGCCGAGCCAGGTCCGGCGACGCGATGACCA  
GGATCTGCGAGGCCAGCAGCTTCTCGTGCACGCCCGGCCAGTCGTCCCCGTCGCCCATGTCCGGTCTCGACCCCGGTTT  
CAGGTTCCAGGTCGACGGCCCGTACGACGTCCACCTCCGCCCGTGGCCCTTGAGCGCCGCGATGACCGTGGCGGCCAGC  
GCCTCGGTGTTTCGACGGCTGGGGGGAGGGTTTGGAGAGTGCAGTTGATCACGAGTGCGCGCATGCCACCCGGGTTCCCC  
GGCGGGCCTGACGCTACCGTCGGCCGT

SCO0604 CAGATGGAGGCGATCCGGGTGCCGTTCCCGGCCGCCGTGCGCAGCGCCTCCCGGACGGCCGGGGAGAGCGGCTCGGC  
GGCGGCCGTACCGGGCACGATGACGGTGTCCGCGTCCCGCAGTCCGTTACGCCCCAGGGGGCCCGCAGTGTGAACGC  
GCCGGCGTCGATCTCGGGGTGCTCGGCGCACACCCGGATCCGGTAGCCGGGACGGCCGTCCGGCAGCCGGGTACGGGT  
GAAGACCTCGATCGGGGTGGACAGGTCGAACGGGATCACCCGGTCCAGCGCGAGAACGGCGACGGTGTGCATGGCCGG  
AAAGTACCTCCTCGCGGGCCGGTGATCGGCGGGCGTGGCGTTTTCCCGTCGAAAGCTGTCACTCCTGCCACAGGCCGTC  
GACCGAACCACTGTCCACCACAATAAGCAATTTGCCTAAGCTCATTAGGTTAATGCACAATCAAAGAAGGAAGACGCTACGC  
AGCGAGACGCACCACCGCCGGAGGCGAC

SCO0614 ACGGAGACCAGGCGGCTGTTGCCGTCCCCGCAGGCGAGCACGTACGCCTCGGGCCCGATCTGCGGCTGCCCGGAGCAG  
TCGAGCAGCACCGGGTCTGCGTCTGCTGGGTGCGTGCCGCGGGCTGCGCCGACGGCGCGGCGGAGGCCGTGCCAG  
CGGTACTGCGAGCGCGGGCGGCGGACAGAGTGTGACCGCTGCCCTCATCGGGTTCTGCCATGTCTGCTCCCGCCGTC  
TCGGGGTCGCTTGTCTCCGCTTGGCCCTTTTCTCCGTTCCGACCGTACGACCGTGTTCGTGAACGCACCACTCGTACGGAG  
CAGCGGCCGGGGCCCGAGGGCGCGGACCTGCGCGTCCGGCCGGCCGTCCGGTTTCGTGCGACAAGACGCCGATTGCATC  
CCCCGTGTGGTCTCCCGGGCGGTCCGCAACCGCCGTCCGCGCCCCGGTGTCTCATGCCGTCAAAGAACGGCGACCCGACC  
GGGCGCCCCTCACGTGGAGGACCGCGGT

SCO0621 GCGTCTTCGGTGCCGTGCTGCTCGCCGTGGCCGTGGCGATGGGCGTGTCCGGCGTACTGTGACCCGCCGACCCGCCGA  
CCCGCCGACCCGCCGACGCCGGCCGCCCGGCGAGCCCGCCGGCGTCAAGCCAGGGAGAGGAAGAGCTTCTCCAGCCTG  
GCCCCATCTGTGCCGAGTCGCGCACCTCGGGTCTGCTACTGGTCACTGACTGCTGCAGTCCCGTGGCGATGATCGAGA  
ACCCGGCCCGGTCCAGGGCGCGGGAGACGGCGGGCGAGCTGGGTGACCACGTCTCGCAGTCCCGGCCCTCCTCGATCA  
TCCGGATGACTCCCGCGAGCTGCCCTGGGCGCGCCGCAGCCGGTTCAGCGCCGACTTCAGTTCGTCCGGCCGACATGTC  
GAGCTCCACGCTTCTCCCTCTCTCCACCCGATACCTCACCGAACCCACATAACCCCGCGGGTATCTACCGCGCGGGG  
GGACGAACAACGAGAAAGGTCTCGCTCC

SCO0647 GAACCTGATCCTGGACGCGCTGACGACCGAGCTGGACGCCGCGCTGCCGGTCCCAGGACACCGGGCGGGTCCGGGACGA  
CCTGCTGGCGTTCTTCTCCGCCCTGGCCCGCCTGCTGGGCACCCCGCAGGGCCGGGCGCTGCTGCGGGTGAAGCGTCGA  
GCACGACGACACCCTGGAGGATCGGCGCGGCCCTACTGGAACGAGCGTCTCGACCCGCGCCGTGGTGAAGTGGTGCAGCG  
GGGCGTCGGGCGCGGGCGAGCTGGCCGCGGACACGGACGCCGGGCTGCTGGTTCGAGGCGGTCAGCGGTCCGCTGTTCCG  
TGCGGGTGTGCTCAGCGGGGCGCCGTTGGACGACGCGCTCGTACGGGGGCTGGTGGACCTGGCCCTTGGCGGGGCCC  
GTCCGCGGTGAGCGGTCCGCCCGTGGTGGACCGTGCGGGTGCGACGGCCCGGATCGGGGACCCGCGGGTCCCTCAG  
GGGCGGGCGCGGGTGCGCCGAGGACGGAGGAACC

SCO0675 CTCTGCGCGTGGTTCGACGATCCGGTCGGCGGAGGTGAAGGTGAAGCTGCCGCGGCTGGGCTCGGTGGCGTCCCACTTCA  
TCTCGTTCTCGGGCGTACCGAGCTGAACTCCCGGTCCAGCGTGGCGGCGTAGTCGCTCTCGCCGAGGTGGCTCGCCGC  
GACGGCGGTGCCGAAGTAGCGGCCCTGTCCGGCGGCCGCGGACCCGAGCGTGTCCGGCGGCTTCGGCGGAGTGGGCCG  
CGGCCGTACGCGGGCGGGCCACGAGACCGGCGGTGGCCGCTCTCGACAGGCGTCTGACAATCATGCTCATGTCATC  
CCGTTCCCTTGAATCGGTGTGCGCAGGCCGTTCCGGAAGGGCGGAAGCCGCCGACTTCACCCGGGAAGTTCGAAAGTTTC  
GGTGCATTTCCGAATGTCGCGGAGGAGATTACGGACTCCGGTCCGCCGGTCAACGCCCGTACCGCCGGATCAACG  
CCCCGTCACCGCCGGGTACGCTCACCC

SCO0677 CAGGTGGCCGAGTGGGACGTCCCGAACGATCCGGCGGGCGGTCCCGAGATCCGTTCCAGGTACCCGGCGGGTGGCC  
GAGTGGGGGCTGGACGAGCTGGCGTTCACCACCGAGCTCATCCTGAGCGAGCTGGTACCAACGCGATCCGGTACGGCG  
GCGAGACCGTCCACGTCCGGGTGGTGCAGGACCGCAGCCTGATCTGCGAGGTGTTCCGACAGCAGCAGCACCTCCCCGCA  
CCTGCGCTACGCGGCGATGACGGACGAGGGCGGGCGCGGACTGTTCCCTGGTTCGCGCAGCTCGCCGAGCGCTGGGGCAC  
CCGCTACACACCGGCCGGCAAGGTATCTGGGCGGAGCAGCCGGTGCCCTGACGGACGCGGCCCGGTCACCCCGCTCC  
GTACCAGTTCGTGCACGACGGGTGCCCGGCACGCCCTCTTCTGGTAGGAACTTTCCTATCAGTGCCCGGCACTCCCT  
CCCCACTCCCCACACCTGGAGATTCC



SCO0686 GACGCCGAGCGCCTCGGACGTCTCGTGCCTGGTCCAGGTGGTTCGTCACCCGGGTCATCCGAGCACCAGCCGGTCCG  
CCATCTCGGCCAGCCGGATGCGGGCCAGGGCGAGGTTCCCGTCTGTTGCGGTCCAGCCACAGATGGAGGAAGACGGTGCT  
GTCGAACGGGGTGCTGACGAACCTGAGCAGATGGTAGGCGTCCCGGTGGTGGTATCAGGTCCTCCACCGGGGGTTCC  
TTGCCGGGCTCCACGGTGCCGCCCGCCGTACCGGCCGCCGAGGGAGCCGCTCTCCGCGACGTGCCGGCCAGCTCG  
GCCGTCTCGGCGGCCGTGCCTCCCAGTCGCCGCCCGGCGCCTCACCGACGGCGCCGAGAGCGAGCCCGCTGATCCAG  
TCGACCAGAGACGCTCCGCGCGCGCCTGGCAGTCGCATGGCTTCCAGCAGACTCTCGTTCGATTCCGGGCACGCCGGATC  
CCCTCCCCTGCACGGCTGTACCGCGAAC

SCO0723 GCGCAGTACGTCCCGGGTGTGGCGCTGGAGGAGACGATCGCGGTGGCGAGGCCCGCGGGCGCGGACCGCGTCGATGTA  
GCGCAGCGTGCCCTCGTAGGGTTCCACGCCGTCGGTGCGGATCTTCTCCAGGAGGAGTTCGTTCTTGCGGTTGCCGACG  
CCGTTGACGGTCCGCGCGTCCGGCGGATCGTCCGGGGTGCCCTCGGGCAGTTCGACGCCGCGGGAGGCGAGGAAGGAG  
CGGACGCCGTCCGCGCGGGGGCGGCCGTCGACGTAAGTGGTTCGAGTCCGGAGTCCGGTGAACGGCCGGAAGTCCGCGCCG  
TCCCGCTCGCGCAGGAAGGTGTGAAGGTGCCTTCCAGGCGGGCGGTGCACCACCGCCGTCCTGGTGACCACCCCGT  
CGAGGTCAAGAGGCAGGCCTGGATGTCTCGTCCGGAAGTCCGAGCTGCGTCGTACATACCCCCACAGTTCGCCCGGGGAC  
GGGTCCGATCAGGTGACACACTGTTCCGGT

SCO0763 CACGGTCAGCACCAGGGCCGAGGGGGCGTAGAGCGACGCGGGGGCGGTGGCCGGGGAGGCGAGGGAGGCCCGGGCG  
AGGGGCCCGCAGACGGCGGTGGCCGTCAGGCCAGAGTCGCTGCCAGCGCGCGGTGTTCCGCATTGTGTGCATCCTTC  
CGCTCGTTTTGAGGGTGGTGCCGGTCCGACCCGGTCCGGTGCCGGAGCGGCGAGCGCGAGTCTGCCGAGTCCCGCACCG  
AACTCATCTCGACCCACGGGTTTCGTAACCTTGCATATTGAATCAGTGGCGTGAAGTACAGAATTAGAACGTTCCAA  
GTCCGGAAGTGGGCGTTTCTTGATCGATTATTGAGAACAAGTGGCCGAATGGCGTATCCGCACCTTCGCCAATAGGCC  
TGAAACACCCCGGAACAGGTCCGTCCGGCCCGACCGCCACCCCGGCATACTCGCGGGTATGGTGCCGGGCAGCGCGA  
GCTCGACGACGAGAGGGCGGACCGGGG

SCO0766 GTGGCGCAGGTCCAGGGTGCCGCTCCACTGTGCGTCGTCGCTTCCCGGAGGTGCGCCGTCCAGGTCCGCCGCGAGCAG  
GTCGGCGGGGGGGCGCCACGACCTCGGCGGCCGGGTGGCCGAGCAGCAGGCGGGCGCCCTCGTTCCACTCGACCA  
GGGTGCCGGAGCCGTCGACGACGGCGCGGGCCGTGGCGGCATCGTCGAACGGGTTGACCGGACTCATCGTCGCCACTC  
CATTGCGCACACTCACGGTGATCAGCGCGTCACCTTGTTCAGCCTAGTGGGTACGGGCGCCCTGCGGACCCGTAACA  
CCGGGCGCTCGGTGCCGGACCGCCCGAGGGGTACCGGTCCGGTCCGGGCGGGCGCAGGGCAGAAAGTGCTTTCGGTGG  
CCTTGACGGGCGCGTATGGCCCGACGTCAGAATCTGTTTGTTCGCGATCGCTTGTGAGTACTTCTGAGTTCTGATGAGCCT  
CGATGAGTTCTGATGAGGGAGATCCGTC

SCO0791 CTCGGCGGGCGGGTTCGGAGCTGGGCGCCCTGCGACGCGCGATCGACGCGGACGACGCGATCGAGGCCACCGCGAGCG  
CCGACGACGTGGACGCGGGCAAGCCCGCCCTGAGCCGGTTCGAGCACGCCCTGGAAGTGGCCGGGGTACCGGCCGAGC  
GGCCCGTCTTCGTCGGCGACACCGTCTGGGACATGCGGGCGGGCAGCCGCGCCGGAGTGCCTGCGTGGGCGTACTGT  
GCGGCGGTCTCCCCGCGCCGACCTGGAGGAGGCGGGAGCGGAGGCGGTCTACGCCGACCCGGCCGACCTGCTGGCCT  
CGCTGCGTGGGAGCCCCCTGGCATGAGGCACCGGTTCCCTGCCCCGACGCCCCGGCCGCGGTTCCCTCGCCCGCCCCG  
CCGCCCGGGCACCGAGACGGGTCCGCCGCTCGCGCGGACGTCCGGCACCGTATGAGCGCTGTGACACACACCCTCCGG  
GAGGCACTCCGGGGACGGCGGCCCGCGGCCGCG

SCO0828 CGTAGACGGCCGATCCCGTGGCCCGGGGGCCGGACGGTTCGTCCGGCCCCTACGGGCGCGGGTTCGACCCGCCGCCAG  
GCGGGCCGCGAGTCCGCGCCCCGGCGGCCGGCCGCGCGGCGCAGCGCGGGCAGACCCGGCGGACGGCGTTCGGCGG  
CGCCCCGGACTCGGGCAGCACGTCCGTCCAGGCGACCGCCGGGAACCGGGAGAGCCGCGAGCGGTGGAGGGACAGG  
CCGCACACGGTCTCGTTCCTGCCCGGCTCCCGGGCGTGCACCTCGCCGGCCGGCAGCCAGCGGCGGTTCGTCTCGTCC  
CACCAGCGGCCCGAGGCGCCACCTCGTAGCGCCGGGTCTGGCCATGGCTCCCGGGTGCCTCCGGAGGGACCGCGCCC  
ACACGCGGTACCTCCTCCTGTGTGATCACTCCGCAAGCCCTGCCCGTTCAGGGCGTTTTGTCTGCTTAACATGCGGGGTC  
CGCGCATCGCCCCGCTGTACGAGAGGACACCAG

SCO0829 TCAAGGAGGACTTCGACGACCCGGCGTCCGCCACGGTCGGCACCGAGGTCACCTGCACCTCGGTGGCCAGCGGCCGGG  
ACGGCGTGGAGAAGCCCGCCAAGTGGGACCTGTTTCATGCAGGCCAACC CGCACATGAAGTTCTACAACGGCAAGCGCGG  
CTACGTCCGGGCCGAACTCGGCCGGCAGGCCACCCGCCTCGACTTCAAGACGGTCTCCGCCATCAGCACGCCCGGCCG  
GCGGTGACCACGGCCGCGTCTTCGTACCCGAGGCGGGCGAGCCGGGCCTGAAGCCCGCCTGATCCGGGGCCCGCCGCG  
CCGGGAGGGCGTCCGCGTACTGCACATGGCACCCCGGCGTCCCCATCGCGCGAAACAGTCCGGGGTTCGGGCTTCGC  
CGCGGATCTTTGCGGCAAGGCCTGTGACTTCGCCGCGAGGCGCACCGTGATCCACGGTCGCCACCGAACCPCCGCTGTC  
TCGCACAGCGCCCGAAGGAGGCACATCGC

SCO0900 GATGGCGCAGCCGCGGGGCTGCCGGAGCAGCTGATCGGCGCCGCGCCGGACGCGTTCTTCGGTCACTTCCTCGACGT  
CTGGACCCGGGACCCGGCCGCCCTGCCCGCCGACGTCCGCGCCGCTACCTGAAGGCGTCCCGCGAGGCGGTGCCGT  
CATCGTGGCCGACTACCGGGCCTCGGCCGGCGTTCGACGTGGACCACGACCGGGCGGACCGGGGAGAACGGCAACCGGCT  
CCGGATGCCGGTACCGTGCTCCAGCAGGACTGGGGCGCCGCTCTCGGCTACGACGCCCGCCGCGCTGTGGCGGGCGTG  
GGCCCCGGACCTGCGGCACGAGACCGTCCGGTGCGGCCACTTCATGGCCGAGGAGGCGCCGGACGAGGTCCCGGGG  
CACTGCGCGAGCTGCTACCCGGTAGCACCCGCCTCGGGGCGTGTGCACAACGGTCCGTTGTACGTGCCACCCGCCCGG  
TTGTTTGTATCCGCCCGGCCCGGCTCGCTTG

SCO0916 TCACGCCCCCGGTGCCGACGCGGATACGGCTCGTGGCCCCGGCCACGGCGGCCGCGAGCACGGTTCGGCGCCGAGCCG  
GCCACTCCGGGCACGCCGTGGTGTCTCCGCCACCCAGAACCAGTGGAAACCCGAGCCGCTCCGCCTCCCGGGCCAGCCGC  
ACGGTGTCCCGCAGTGCCTCCCCGGCACTGCGGCCCGCCCGGATGCGGGAGCGGTTCGAGGACGGAGAAGCGGGTGTGC  
GCGAGTGCAGAGGTACACCGTCTTCAACGCCCGCACGCCGCACAGATTCCCGGCGGCGGCCCTGGCTAGGGGGTGTG  
GTTTGGATCTTGCCGGGGGTAGCGGGGTCCGGCACGCGCATCTGCGGCGTTGTCTCGTTGCCGGGGCTTCGCCCTGT  
CGCCCTCCTCCGCCTTGACGCTGCACGCACCAGACCCGGCTCGGGCCGGCCACAAGGCACCGTTCGGCCGCGGCCGGCC  
TGATCCGAACGACACCCCTAGGGTGGGCGG

SCO0945 GCGCGGCGACGACGACGTCGCGCTGCTGGTGTGCGCCGGCACGGCCTGGGCGCCCCGCGGACCTTCGGCCGGGTCCA  
GCAGCACGTCTCCCCGGGCGACCCTGAAGGCCTCACCGAGGCCCGGCACATGATCCGCGCCGCGTCCGCTCCTGGGGA  
GCCAAGGGGCGAGAGCGACGAGATCGAACTGGTCCCGACGAGCTGATGACCAACGCCCTTATGCACACCGAGGGCTCCG  
CCGTCGTCACCTGCGGCTGCTCACCGGAACCGACCGGCGGCTGCGGGTCGAGGTCGAGGACTCCTCCAGCGCCCTGCC  
GCGCCGCGGGAGGCGGGGACGACGGGGTGTCCGGACGGGGGCTGCTCCTGGTTCGACACGCTCGCCGACGCGTGGG  
GAGTGGAGGCGCGCGGCGGAGGCAAGGTCTGCTGGGCGGAGTTCGTGGTGGCGCACGGGGCGGGCTGAACCCGCTGG  
CGCCGCGGTGGCCGGTGGCACCCCTGGACGT

SCO0964 CACGGCCTTCCCCGACCTGCCCGCCGCACCGCTCGCCGGGAAGACGGTCATCGACACGTGCAACTACGGCCCCGAGCGT  
GACGGGCACATCCCCGAGCTCGACGGCACGTGCTCACCTCGAGCGAGCTGCTGCTGCGATACGTCCCGGGCGCCATGC  
TCGTGAAGGGTTTCAACAACATCTACTTCAAGCACCTGCTGTCGCTCGCCCGCCGGCGGGGGCGACCGACCGCTCCTAC  
CTGCCGATCGCCGGGGACCTGGCGCCGGCGAAGGCGGCAGCCACCGAGTTCATCGATTCCATCGGGTACGGCGTGGTG  
GACGCGGGGCTCCTGGCCGACAGCTGGCGGCAGGCGACGGGCACACCGGTGTGGGGAACCCCGTACGGGCCGCCCTC  
GAACGAGATGGGCCGGCCGACCGGCCCGGGCGCCATCCGCGCGGCACTGGCCACCGCAACGCGATAGTCGCAACTCGG  
CGCGGGCCGCAGTACGGCCAGTCGCGATC

SCO1171 GTGCCCGGGGGACGGCCTGGCAGCAGACGGTACGGCGGCTGTCCGGGCGCCCGGTCCAGATCCCGGAGGCCAGGGAG  
CTGGTCGCGCTCGGTGCCGCGGCGCAGGCGGCCGGTCTGCTGACCGGCGAGGACGCGGCAGCGGTTCGCCGACGCTG  
GAACACGGCCGCCGGGCCGTA CTGACGCCGTGGAACGGGACGAGGCGACGCTGAACCGGATCACCGGGTACTCTC  
CGACGCGGCACCGCTGCTGGAACGGGACGCGGCCCTCCCGCTGAGGGCGCGCCCGCACGGGCGGGCCACCGGCGGACC  
CTCCGCCCTCCGCTCCCCGCGGAACCGCCGCGGACGGGTGCCAGCAGACCGGGACGTGACGAGGGGCATCTCAGGC  
ATCTCCCGTCTGCTCCGGCTTCGGACGACCCGCACGTGGCCCCACCGCGCCCCGTGGCGGGCCGGCCGGGACCGGACCG  
GACCGAGCGACGAGAGACCAAGGACTGACGGAGGC

SCO1446 GCTGGTGGCGGAGTCGGGGATCGGGTGGACGGTGTGCGGGCCACCCAGTTCCACGACCTGGTGGTGCAGATGCTCCG  
GGCCCTGGCCAAGCTGCCGGTCTGTGGTGTGCCCCGCCACGCCTCGGACCAGCCGGTGGAGGTGGCGGAGGTTCGCAGA  
CCGGCTCGCCGAAGTGGCCAGGGGGCGCCCGCCGGACGGGTGCCGGACATGGGCGGTCCCGAGGTGCGCACCTTCGC  
GTCGCTGGCCCCGCGCCTATCTGGGCGCGACGGGACGCCGGCGGGCCGTGGTGAACGTGCCGCTCGCGGGGAGGACTTA  
CCGCGCGTTCCGCGCGGGCGGGCATCTCGCGCCCGAACACGCGGTCCGCGAGGGCACGTTCCGAGGAGTACCTGGCGGG  
GCGGTTCCGGCCACAGGGAGGGCGGGCGGGCGCGGATGAGCTGACGGGCGGGGCCGGGGGCGGGGGCGGGGGCCG  
GAGCTGCTCGCGGTCCGCCCGGTGGTGTGCTGGGGCT

SCO1602 TCAGTAGCCGTTCCGCGACACCAGCGCATTTCAGGGGCCTCGATCTGTCTATAGAGCTCTGGGGCTCGCGATGAACAAGAG  
GTCGACCCTGGAATGGGCTCGCGCCGTGACGACAACGTCTGGGCGGCCATTGTGAGTTTCGTGGTGGTCACGCAGGCAC  
CGGGCCGTGCCGCTCTTGACAGAGGCCTGGAACGGCCGGGGGAAACGGAGGCATCAGCCCGGCGCCCGCGTCAACCCA  
CGAAACTCACGAGTACGCGCATGTTCCGCGGTGGTGCGCAGGCTCCGGGCTGTGCTCTATCGGGAGGCCTCACGGGCCA  
TGGTCCGATCAGACCTTGCCCGGCACCCACGCACCACCGGTTCATCGGTGGGCAGCGGCGCCGGTCTCAGAGAGAGCCTC  
GGGACTGGAGAGGGCCGAGGCGTCCGCTGCCCGTGCAAGCGTCTCTTCGCATCCTTGCGGGGTCCGCGACGAGCTGCT  
TACACCCTGGATTAGGGTCGGGGACC

SCO1609 CCCCACACCGGCGGCCCGGGCGGCATCCGGTCCGGGGGTCCCGTCCGCGCCCCGGCGTGGGCGCGGACGGCGGTCCGG  
GGTCCGTGCGCGGCGGCGCCTCGGGACGGGGCGGGATCTCGGGGTGGTGGGGCGGGGTCTGCGGGCGGGGCGGCGT  
TCGCAGGTGCGGCGGAAGGGAGGCGCGGCGCGCTTCCGTGCTCATGCACCCCCGTTTCCCCGGGCCCGGCCCGTTTCT  
CCGACACGGGCGGAGACGGTGGTCTGACCGTGGTCTCCTGCCCGGCCCGGCGCGGAACCGATCCGTCCCGGGCACG  
CATAACCGCTCGGGAGGACCGCCATCCCGGCGCGGGCTGCCGGGGCCCTGCCGCGGGGGCCGGATCCGCCCGTGGCT  
GCGCGTCACTCTACGGCGTGACCCCGCCCGACGGGGAACCGATCCGCGCGCCCGCGGCATTGGCCCGGATCGTCCCCCT  
ACCCTGCGGTAATCCTGTCTGGCAGGCTGCCGTC

SCO1694 CCGAACCCGGCCCCGGGAGCAGAGATGGTCCCAGGTCGCCCTGTGCCATAAGGGGCGAATCGCTCAAGGCACTTGCGCA  
GCGAATAGCGCCGACGCCAGGTGCGACCGTGGATCGCGGACCTGTCTCGCCAGACTTCGGAAACCGGCCATCGCCCT  
GCACCTCCGTACACCTTACCTGTACTCGGGTCACTTCGGCGTCCCGTACGGACGTGCGCGAATAGACGTATCGACAA  
CCGATTCGGCTCCATCCGATTTCCGATGCCCCCATAAGCCGATCCACCCGCTCCCAAAAAGTGACGCATGTTACCTTCC  
CACTCGGGGATAACGGCGGTAACGTCCCGCCACACCCCGTCCGGGAGGAGCTGCCATGCCACGGCGCACCCACGCAAC  
GCCCTCGACAGACTGAGAAGTCCCGCGGGCTTCCACGGGTTCTGAAGACCGCATCCGTATGCGCCCTCGTTGCCGGACT  
TTTGTACCGCTTTCCCCGGCG

SCO1704 CGAGGCCGCCGCCCGGCGTCCGCGCACCTGCGGGCGTTCGAGCGCCGGTTCGGCGATGGCCCGGGGGCGCACCTGCT  
ACGACCATCTCGCCGGACGGCTCGGCATCGCGGTACCGACGCGCTGACCGGACGCGGGCTGCTGCGCCAGGACACCG  
GCTTCGCACTCACGGACGCGGGGCTCGGCTGGTTCGACTCCGCCGGGATCCCGCTGCGGCCGACCGGGCGCCGGCCAC  
TGGCCCGGGCCTGCCTCGACTGGACGGAACGCCGTCCCCATCTCGCGGGCGTGGCGGGCGCCGCCCTGTGCCGGCAGC  
CCCTGGACACCGGCTGGTGCCTGCGCATCGGCTCGGAGCGGGCGGTGAGGGTGACACCGGCGGGCGAGGACGCGCTGT  
CCCAGCTGCTGGACATCGACCCGGCGGCGCTGCGCTGAGCGCCGCCCGGACGCTCACCGTCCGGAATCCGCCAGC  
ACGCACCCGTTCTCGCCACCTAGCCTCTGGAGC

SCO1737 CGCCCGCACCCCGTCCCTACCGAGCACGTTCGGCCACGCGCCACGGCCTCCGCGGCCCGCCCTCGGCCGCCCGCGT  
GCAGGCCACCCCGCCTCCGTGAGCACGACGAGCCGGGCGCGCGCTCGACGGGATGCGGCCGGCGCTCGGCGTACCC  
CTTGCGGACCAGCTCGTCGACGAGCTGACTGGCGGCCTGCTTGGTCACTCCGAGGTGCACGGCCAGGTCCGTGACCGTC  
GCACCGTCCGGGGCGAGCCGGGCGAAGGCGAACCCTGCGCGGGCCGACACCCTCGAAGCCGCGGGCCACGACCCCT  
TCGTTGATGCGCTGCGTGAGTCCGCCGGCCGCGGGCGAGCAGGGCGGCGGTGAGGGCCATGGCGTCCGAGTTCTGCACG  
GGGGCATTGAAACACTCTTGACACTTTGGTCAAGCAGCTTGACCATAAGAGCCACAGTATTGGTCAAGCTGCTTGACCATG  
TCGGCCATATGTCCAGAGGAGCCCGTC

SCO1779 GCGCGCAGGTTCGTGGTTCGTCACGCACCTGCCGCAGGTGGCCGCGTTCGCCGACCGGCAGCTACTGGTGGAGAAGACGA  
ACGACGGCTCGGTGACCCGCTCCGGCGTGAAGTCTTGAGGGGCGAGGAACGCGTCCGGGAACTCTCCCGGATGCTCG  
CCGGCCAGGAGGACTCGGAGACGGCCCGCGCCACGCGGAGGAACTGCTGGAAACGGCCCGGGCCGACCGGTAGGGAC  
TCCGGGGGCGGGCCGACCGGCAGGACTCCGGGGGCGGGCGGGCGTTCGCGGCTCTCCCGGACGCACGCCCC  
GGGTGGCCGGTTCGACGGCGTGACGTTCACTCGTACGAGTGAGGTGGTTCGTTGTCGTTGTCGCGCGGTTCGTCGCGGTC  
GTGGCGGTTCGTTCCCGGAACACCCGTGCGGCCTGGCATCCTTGACGGAGCGGCGCACGGGAAACCGCCCGGCGCA  
CCCCGTCCGCACCATCCTTCTGTACGTTCTTC

SCO1854 CTGCGGACCTCCGGGATGGTTCAGCTCGCGCTGCGCGAGCGCGGCCACGGCCGAGAACGCGGAGACGCCGGGCACCAC  
CTCGGTTCGCGACACCGATCTCCGCGCACCGGTTCGAGCTGCTCCTGCGTGCCGCCACAGCGCCGGTTCGCCGAGTG  
GATGCGAGCCACCCGACGCCCTCCGCCGGGCCCGCGGTACACGGCGACGACGTCCTCCAGCGACATCGTCGCCGA  
GTCCAGCACCTCGGCGCCCTCGCGCGCTGCTGGAGCACCTCCGCCTGGACGAGGCTCGCCGCCAGATCACACGTCC  
GCCTCGGCGATCGCCCGCGCCGACGGAACGTTCAGCAGGTTCGGCGGCGCCGGGACCGGCACCGACGAAGGTACCTTG  
GCCTCGGAATCCATCGTTTTTCGGTCTCTCCTGTGCATCCTGCGCATATTTACTGCGGTTGCTGCTGTCGTACGCGCGTGA  
ACGCGGGGTGATCGGATACCAAGGGCCC

SCO1892 GCACCGGCGACCTCGCCGGGCAGGTGATGCCGCCGGCCCGGGTCATGCCGGTCCACGCCTCGGGGTTCGCGCCACGCC  
TCGGCGAGTTCGCCGAGTGCGGCGGCGAGCTCCTCGCGCCAGCCGGGCCGACGTCCGGCACGGACGCCTCGGGGCTG  
GTGTCCGTGGTGGGCCCGAGATCCTTGC CGCGGGCGTTCGCGGAAGGCGACGGCGAGACCGGTACAGGTGGCCGAGCAGG  
TTGCGCACCGCCAGACCGGGGCAGGGCGTCCGGTCCGCGAGCCGGTCTC GCGCACGCCGTTCGGCGAGGCCGGGTGAG  
GACCCGCGTCTGCGGTCCCAGGTTCGAGGGTGGTGGTCTCGGCGGTTCATCGGCTGCTCCTCGGGATGTGCGTGGCCGGTT  
CTCTCGGAAGGTTGACCGGTTCGACCCGCGAAACTCATCGGCCGCCGCGGCGAGTACTGGGGCACCTGCCCGATGCCCG  
CACCCGGGCCTTAGGCCAGGGTGACCGGGT

SCO1896 CCCGCGCCCGCCAGGACGGGCACCCGGCCCGCGCTCTCCTCGACGGCCGCGCGGACGCAGGCCGCGAACTCCTCGGGC  
GTGAGGGCGTGGA ACTCGCCGGTGCCGCAGCAGGCGAAGACCGCGGCGGCACCGGCCTCGACCCCGCGGCGCACATGG  
GTGCGGTAGACGTTCGAGGTTCGAGTCCGCCGTCCGGTCCGTACGCCGTGACGGGGAAGAACAGCGGGCCGCTGGGCACG  
GTGAGCCGGGCGGCGAGAGGGGCTGAGGTACGGGCGCTCCCCATTCCAGGTGCAGGGTCGATTCACGGACGTCATCAT  
ATTCATGACCTGCGTCTACATTTCTGAACGCACCACGCTAAGCCGCCCCGCGAACACCGTCAAGCAGGGCGCCCTCTTGACG  
CCTGACCACCGGCTCCTTAGCGTGTCCACGCATCTGAACGTGAGGCACACACCGGCACGCACGCGTACGTCTGCCGCTTC  
CACAGACCGACCTAGGAGTCCCGAGG

SCO1954 GGTCCTGGAAGTAGTTCGCCAGGCGCTGGCGCAGGCTCTTCGCCTTTCCGACGTAGATCACCCGGCGGTGCTCGTCACG  
GAACCTGTACACCCCGGGGAGTCCGGGATCTCTCCCGGCCTGGGGCGGTAGCTGGAGGGGTTCGGCCATGACTCACACC  
CTACTGGCGCGGACCGACACTCCGGCGGGCCTGTGGACGACGGGCCGACCCCTGTGGACAGCCCGCGGGAGAGGCCG  
GGGAAGACGGTACGGGGCCGGCCGGTACGGCGGGTGTCTCCGGGACCGCGGGCCCGTGC GTTCTCGGCCAGGAGC  
GGACGGCGGTTCGGGCGCCAGGTGTTGTCGGGACTAGGTTCGACACGCTTCAATGCGGGGGGACTCGGGGCCCTGAAGCG  
CGGCGTACGGATGTGAAGACCTCTGCGTTCGCGAGCGGGGGCGGGCGGCCCGGTTCGATCCGTGTCGACGGCCTGACCA  
GCCGCCGTGAACTTCACAGAAGGGCCCCTGC

SCO1990 GGCGACCGGAGCACCTACGCGCTTGCGGATCAGCCGCTTCACGACGACGACCCGTTCCCGGCCCTCCTGTGCGCAGGCGC  
ACCTCGTTCGCCGACGCGGAGCGAGTACGCGGGCTTCACCCGCTCGCCGTTACCCGGACATGGCCGCCGCGGCAGGCG  
GTCGCCCCAGGGAACGGGTCTTGATCAGGCGGACGGCCAGATCCAGCTGTCCACGCGGACGCTCTCCCGTGTCTGCG  
GCCCGGCCGCTCGGCGGCGGCGATCGCCGCCGCCGTCTTCGGGTCCGGTGTTCGCGGTCTTCGGGTCCGGTGTCCCGG  
CCGCGGCAGCGGCGCCGTCCCGCGGTGCGGCCACCGGGCCGCTCCCGCCCTCGTCATGCTCGGAAGCCATGGTCCGAC  
CCTAACCGCCCGGCACGGCGCGGGCGGGCCGCAATTTGCGGACCGACGACGGCCACCACGAACAGGGGGCACGAGAGGG  
TTGGGCACGAGAGGGTCTTACGGTGGAGGC

SCO2000 TGCCCTTCGCGGACGGCTCGTTCGACCTGGCGTGCTCGGGCGTACGGGGCGCTGCCCTTCGTCGCCGACCCGCGGCTGGT  
GCTGCGGGAGGTGCGCCGCGTGTGCGGCCCGGGCGGCCGCTTCGTCTTCTCGGTACGCACCCGCTGCGCTGGGCGTT  
CCCGGACGAGCCGGGCCCGAGGGGCTGTGGTCTCCGGCTCGTACTTCGACCGGACGCCGTACGTGAGCAGGACGA  
CGAGGGCCTCGCGGTGTACGTGAGCACCACAGGACGCTCGGTGACCGGGTGCGGGACGTGGTGACCTCCGGGTTCCG  
GCTGGTGGACCTGGTGGAGCCGGAGTGGCCGACTGGAACACCTCGGAGTGGGGCGGCTGGTCGCCGCTGCGCGGGCA  
TCTGATCCCGGGGACGGCGATCTTCGTCTGCGAGCGGACTGAGCCGTACCGGGAGGGCGGGTCCACGCGCGCGTGGAG  
GGCGCTTTCGCGGACGTACGACACTGGGGGC

SCO2040 GACGGCGCCCGGGCCCGCTCCCGCCCCGCGTCCCGACCCGCGTCCACCCACTGGAGCACCCCGCTCACGGCGCGT  
GCCCCCGTGCGGGACAATGGGTGCGAGCGTCCTGCTCAGACATGGCACACAGCAACGAGGAGCAAGCAATGGCGGGCAG  
CAGCCACGGTCACACCCCGGCCGCTGGACCGGTGTATCATCGCCTTCATCGGTTTCTGCATCGCGGGCATGTTTATGG  
TGGCGGCCAGCCGTGGGGCTTCTGGGCCGGCATGGCGGTGCTGCTCCTCGGTGGTGTGTCGGCTACATCATGAAGAT  
GATGGGCCTCGGCCAGCCGAAGCAGAACCACCCCGTGCACCAGGTGCGGGGCGAGCGCGCCGAGGCCGGCGCCAAGGG  
CTGACCGGGCGCGGGCGGTACGGACCTCCGAAGGGGCGGACCGGCACCACCGTGCCTGGGACCGCCCTCACGTGCGTG  
CGGGGGCCCGGGAGGCAGAATGCGGGA

SCO2042 TCCGTCGAGGTCGTCGACTTCATGTCCGTCGAGCGGTACTCGCACGTCATGCACATCGTCTCGACGGTCACCGGCCGGGT  
CGCCCCGGGCCGACCCGCTTCGACGTCTCACCGCCTGCTTCCCGGCCGGCACCCCTCTCCGGCGCGCCCAAGCCGCGC  
GCCCTGCAGATCATCGACGAACCTCGAGCCCTCCCGGCGCGGCCTGTACGGCGGCTGCGTGGGCTACCTCGACTTCGCCG  
GCGACTCCGACACCGCCATCGCCATCCGCACCGCCCTGCTGCGCGACGGCACCGCCTACGTCCAGGCGGGCGCGGGCG  
TCGTCGCCGACTCCGACCCGGTCGCCGAGGACACCGAGTGCCGCAACAAGGCGGGCGGCGGCTGCTGAGGGCCGTACACA  
CGGCCAACCGGCTGGCGCAATAGGGCCAACCGGTGCGACCGGTGGGGCGATTCTCACGCCCTCAATGGGAACCCCGGGT  
GACGGTTCGCCCCGGGGTTCGGGTGATA

SCO2062 GACCTGAAGGTGCTGCTCGGGCCGTCCTGCCTGGCCGGCTGAGCGGCATCCCGGACCACGACGAGCGAGGGCGCACCC  
GGTTGCCGGGTGCGCCCTTCGTGCTGGCTGTGAGTTGTGGCCGAAGCGCTTGTTCCGCTTGCGGGCGGCCGCGTCCCG  
GGCGTGTGAGCTGCGGGGAGTGTGCTGCTCCTCGCGGTCCAGTACGGCCGACTCGGCGGCCTGCGGGGAGCGCTCGGCC  
TGCGGGTGCTTACGATCACGGTTGTTCTTGTCTTGGCCATGGTGTGATCTACCTCCTGAGGGGGATCTAGGGGCCAGGGCC  
GGAACCAGATTCACATAGGCCAACAAAGAACGCATATCGGGCAATTACCGTCCGTGACGCGGTCCGAGCGGACACGGGGT  
GCCGAAACGCCACGCCGAAGATCGAGTTCGGGCCGTTAACCTCCGCGTGGTCCGGGCGACTCGAAGGAAGCCCGAAGCA  
AACCTCCCGGAAAGAGGGTGGACCGC

SCO2074 GCTGTTCCCAAGGCCCGCGGCACCGCCGCGGTCCCCGGCGACCTCGCGGTACGCCCCGGCGAGGAACCCTGGACCCCG  
CAGGAGGTCGAGGAGGCGCGCGGCGAGCTTCAGTCCGAGGCCGACCGGCTGCGCACCGAGATCGACACCTCCGAGCGG  
TCGCTGCAGGGCATGATGCGGGACTCCGGCGACGGCGCGGGCGACGACGAGGCGGACACAGGCAGCAAGAACATCACG  
CGCGAGCACGAACCTGGCGCTGGCCGCCACCGCGCGCGAGGTGCTCAGCCAGACCGAGCGTGCCCTGGACCGCCTGGAC  
GCGGGCACCTACGGCCTGTGCGAGAACTGCGGCAACCCGATCGGCAAGGCGCGGATGCAGGCGTTCCCGCGGGCCACC  
CTCTGCGTCGAGTGCAAGCAGAAGCAGGAGCGCCGGTACTGAGCCGCAGCCGGGACGGGAAGTGTGCCGTACCCTCGTG  
CTCAGTCAAGGACCTAGGCTGAGGGACTCAC

SCO2106 GCATCCCGGCCGCCACCTGGGCCGCCCGCCCGCCGGCTCGGGGTCCACGAGGGCGGTGACCAGCCCGCGCCGCGCG  
GCCCGCCAGGCGGTGACGAGCCCGATGATCCCGCCCGCCGACGACGAGCACGTGCGGGCGTACGGGACGTACGAGGTGTG  
TGCGGAGGCGTGTGTGATGGAGACGACATGGGCGTCCAGCCCCTCCCTTCGCCGGCATGACCCGGATCAGGTTTCGTACG  
GTCGGAGGCCGCCAGCCTCCCTCTCAGCCCGGTGCGTCCGGGCTCCCGCGAGTGCCCTTGCTCCGGCCACCCTAGCCCGC  
CGGGCGGGCGCCCTGTAAGGGAGCCTCCCGGGGCGGGGGCGTCCCGGGCAGCCCGCGGGGTGCGGGCACCGACCG  
GCGAAACGCCGGGTGTCTATGGTATCGGGTGAGCGAGCAGACGCGGGAACGGGAACAGCGGGACCGACGCGAACGGG  
GACGGCGGGCCGGCGGGCGGACGCGGAGCGCCGT

SCO2173 GCAGTGACGGGGCGGGGCCGCCCGCCCGGGCCTCAGGCCTCGGTCCCCGCCTCGGCCTCGGCATCGGCCTCC  
GCCTCCTCGGCGTGCAGGCTCATCGGGCCGTAGATCTCGGTGGAGTCTCGAAGAGCCGCACCTGGTCCGTGCCGCCG  
CCCGGAGGTCCTTCCACTGCTCCCCGATCCAGGACTCGGCGTCCCCTTGCGTGGTGAACCTCCTCGGGCTGCACCGCGGG  
CTGGACCTCCGTCCCGTCCGGCGTCTCGAACCGCCACGTCCATGCCGCCATGTACGCCTCCAAGGTGTGAGCACATGCAG  
AGCGGAAGCCGGACCTTGATCCGTCCCTCCGCCCGCAGCCTATGCGCTGAACCGGGCGCACCGTAGAAGGCCCGGGGAGA  
AGGCCCGCAGGGGGTCCCGGGGGCGGGAACGGTCGCGGCATCCGCCCTCGGGGGACTCGGGCGCGCAGGTCGCC  
GGGTGACCGGCGAAAATCGGTGCGTGGAC

SCO2177 TCCTGGGACATCCCGTCGACACCGAACGGCGTGAACCCCGCCAGCACCAGCCCGACCAGCGCCGCGGTGAGCACCACGG  
CCTCCACGCTCTTGCGCCCCGCCTCGCTCCAGTACACGTCGTCGAGGTGCAGGATCAGCGGAACTCGTCCAGGACCAGC  
CCCGCCCCGATAACGAAGACCACCGCCGCGAGAGCCGACCAGACCCCGTGCCGGCCCCCGCGACCGCGCCGAAGCCG  
CCGACGACGGTGAGCACGACCCCGGGACGACGTGGTGGATGTGCACCCCGCCCGCCTTGACGTTCCCGAAGGGCCCCT  
TGCCCGCCCGGATCAGACGGGTGATCACCCGGGTGACCGCGAACGTCAGCACGAACGCCGCCAGCGCGAGGAGCAGCG  
GCAGCTTGCCCGGCTCCATGATGTTGCGCTGCCACCAATCTCCATATGCGCACTTTATCCCCAGCACCCGCCCGCACCCC  
GCCGACCGCCGGGTAGTCTGCGCCG



SCO2190 TCCACGACGAAGCCCTCCGACTCGTAGAGGCCCCGGGCGGCCGTGTTGTGGCCGAGGACCCGCAGGGTGATCCGGCGG  
AAGCCCTCGTGCCGGGCCTCCTCGACGGCGGCCCGGACCAGTGCCCGCCCCACGCCGTGGCCGCGGGCCGCGCCGGC  
GACGGCGAGGCCGCGGATCTGCCGGACGTGGGTGTTGGAGGCCAGCGGAGTGGGAAACCCGAGGCGGACGTAGCCGAC  
GACGGCACCGTCGAGTTCGGCGACCAGGTGGGCGTCGGGGCCGCAGGTGTCCCGGAAGAAGGGGTGTCGGGTCCCGG  
TGGGGGCGAGACGGCGTGCAGGTAGGACCAGGTCTCGAGGTGATCCGGCGCAGCGGGTGCTCGTCCTCGGACCTGGC  
GCGGCGTATGTGCGGGGCTGGCATGGCGATCACTGTACGACGCGGTGTCCGAGACCGGTCCGGGGTTTTTCCGGGGCCA  
CCCGGCAGGATGGCCCCCTGGAGGACGGCCAC

SCO2255 CGTCGAAGACGGAGGCGGTTCATCGCGTTCGACGCGGTGAGCATGGGCCACTTCTCGCCGCGCTCCTTGGCGGCGGTGAT  
GTCCCGGACGGTGATAACGGCGGTTGATCTTGCCCCGTACAGCGCCCTGTTCCCGTCGGCGGGCTTGGGCTGCGGCGTC  
TGGGCAGCCGAAAGCTGCGTCATGGCAACGGCTCCTTCATGTCATCTCGAGGCGCCCTGACGGCGTCCCGGATCCCTTC  
CATGGTGGCACTTGTGCGCCCCGGCGGCTAGGGGACCCCGTACGTACCCCGTCCGGGGTCCAGAGCATGGCTCATGC  
GGCAAATGTGCCGTTGTGTACAGAGCCGCCGTCCCGGCACAGTGCGGAACCTCCGCGGGACGGCCCGTACGTCTC  
GTCCCGTACGGCCGTCCAGGGCGGCGGGATCGGAACCGATCATCCCTATGGTGCTGAGTCACAGGGGGCGACGGTGT  
GCACAGCAGGCAGTGAGGCAACGGT

SCO2264 GGGAGAACGCGGTGCCGCCGCCCGGGGCGCCGCGCTTCCGCGACCGCCTCTCCCGCCTCGCCGACCACCTGACGG  
CACCACCACCGTCCGGCTGGTGACGACTGCCGACCGCTCCTGTTACGCCGGCAACGCCACACCCCGGCCGAATCCCCCG  
TCACCGTCCAGCCATCGGCCGCGCCCCGACGACCAACCGCCCCGGCCGCCCGGCGCCCTCCGTACGGACCGCGCCCG  
GACGCCTGCCACCGCCGTCCGGCCGCGACCGACCGCGCCCCGGCACCCGGCACCCGGCCGCGCAAGCCCGGCCCATG  
ACCGCCGACGTCCCGCCCCGCGGCTGCCGCCTCCCTGCCAACCGCGGCCCGGCCGGCCGGGACCGGGCGTGGGCCGGTC  
GTCCGTGCGCGCCGGGAAAACCGGTTGCCCGTGCTCGTCCCGCCGCGGACGATGACCCCTCGTGACCGACACCTCCTC  
CGCCGACGCTCCCGTCGGCAAGGGCGCCGAC

SCO2376 GGTCCCCGGTCTCCCTCTTCTGCCACAGCTACGGCTCGGTGGTGTGCGGCCTCGCCGCCGACATGCTCCCCTCGCGGGT  
GACCGACATAGCGGTGGCCGGCAGTCCCGGCATGCGCGCCGAGAACGCCGCCCGCCTGGACACCTCCGCCCGCGTGTG  
GGCGATGCGGGACGCCGACGACTGGATCCAGGACGTGCCGTACCTGGAGGTGCGCGGCCTCGGGCACGGCGCCGATCC  
GGTGTCCGCCGGGTTCCGGGGCGCGAGTGTGTCGCGCGGGACGCCAGGGCCACAGCGGCTACTTCGTGCCGGGCAC  
GGACAGCCTGCGGAACTTCGCGGGGATCGGTGTTGGCGCATACCGCACGGTCGCCTGCGCCGGCGAAGACGACACATGC  
CGGGCGGGTTTGTCCGCGGGCGACGGCGGCCGGACGCGCGTAGAGGCGCAGAACTCCGGTTTGCACGGGGAGGGGAC  
GGGAAGGCTCGTGCCGCATACGATGAGCCGC

SCO2385 GGTCGCGAAGGCGATCTCCCGGGCGTACACGAGCAGCGCCTCGCGCAGCACCGACTCGTCGCCGGGAGCCGCCACCTC  
GTCGATCGCGGACTCCATCACCTCGATGGTGGTCCGCACCATCTCCACGGTCTGCCGCAGCGTGATCGCCCGGGTTCAGCT  
CGCGCGGGGCGGTCCCGAAGACGTCGGTGGAGATGGCCTGGGGCGCGTCCGGCTGCCTAAACCACTCGGTGAACGCGG  
CGATGCCGGCCTGGGCGACCAGCCCGATCCAGGAACGGTTCTCCGGTGGCATGGCCCGGTACCACGGCAGCGTCTCGTC  
CATGCGCGCGATGGCCTGCGCGGCGAGCGAACC GGAGGACTGCTCCAGCCGCTTCAGGGTTCGCGGTATGCGGGTGGGC  
GGGCTTGGCGGGGGCGTCCGGCTTACCGGTTTCGGGTTCCGGGCACGGGGACAAGACTGCCTTATCGGGCCGGGCGGGT  
GTGCCGCCGGGGCTACCGTGAACGACGTG

SCO2409 CAGCGAGATCAAGGGCCAGGTGGCCAAGGCCGTCGACCGCCTCTTCTCCTACGACCACGCCGACCCCGGGCGCCCTCGAC  
AAGGCGGCGCGGGACCTCCTGACGGGCAAGGCCGCCGACCAGCACCGCGACCTGCTCGCCGACGTCCGCGCACGGGCC  
GACGAGCAGAAGGCGGTGATCACACGACGGTCACCGAGAGCGCCGTCAACGCCTCGACGGCGACCCGGGCCCGGGTTC  
CTCGTCTACGCCGACCAGAGCAGTGTGCCACCACCGGGAAGAAGGCCGCGACGGACAAGGAGAGCAAGACGGACGGG  
GCGGCCGCGCAGGACGAGGGCGTGTACGCGGCGGCCATGCTCGCCGTGACGTCGTGCACCGCGACGGACGCTGGCTG  
GTCTCCGCCCTCGACACCTTCGGCCGCTGAGCCGCACGACCGACCGACCGCCCTGGTGGGCCACCTCCCCGGCCCCGCA  
TCTCCGACGGATCCGACAGGAGTGACGACC

SCO2410 CTGGGCCGGGCAGGACTGGTACCGGGCGGCCACGACGAGCAGGCCGCGTACGCCGCACAGCGGGACGCGGCACTCTC  
CGCCGGCGAGCAGGCCGTGCAGAACCTCAACACGCTCGACCACCGTGAGCTGAAGCGCGGCCCTGGACCTGTGGGAGTCC  
TCCACCACCGGCGAACTGCACGAACA ACTCGCCTCCGGGCGGGAGGAGTTCACCGCTCAGATGAAGGAGGCGAAGACGG  
TCAGCACGGCCCGGGTGTGTCCGGCGCCGTACCGAACTCGACGACCGCGCCGGACGCGCCCGGGTGTGTGCTGCC  
TGCGCGTACCGTTCGAGGCGGCCGACGGAGCGAAGAGCGACAAGGACAGCCGGATGCTCGGGCGAACTACCCGGACCG  
ACGGCCGGTGGAAGCTGAGCGCCCTGGGCCAGGCGCCCGTTCGGCGGGACGTCGACCGGCTGAGCCGGTCCGTACCGCG  
AGAGCCGGCCGCAGCGAGGAGGACAGCACC

SCO2441 CGCACCGCGTGC GTGGAGTCGACCTTGGCGATGTAGATGACGTCGGTGTCTCCTCCAGGATCGCCACGTGCACCGTCTCGTC  
GCAGGTCTCGGCGACGGTCCGGGCGACCTGTTGGCCCTCCGCGGCGAGGTCGAGGTA CTGCGGTAGCGGGCGCCGAG  
CTGGTACGGGCGCACGCCGAGCCGGTACCGTCCGGACTGCCCGGCGACCGGGACGATGTA CTGCGGGCGGGCGAGCGT  
GGTGACCAGCTCGTGCACGGTGGTGC GCGGCGAGCTGGAGCCTGCGCACGATGTCCGGGGCGGAGAGCGTGCCGTCCCC  
GTCGAGGAAGAGCTCCAGTATGTGAGAGCCCGGGTACGGCCGGCACGAGGCGTCCATGTCCAGCCCCCTCCCTAGA  
TATGTTTCGAGATTTCAACAAGCGATCGGAATAACGAACACAGGCTACTCATACCGCGTTTGCCTGGGCAATGGGCGTGCGG  
CCGCCCCATGGTCCACTGCGTCCGCG

SCO2468 CGCGCGCACGGCGGGCGGCATCGTCTGTCGACGACCACCTGCGCACCTCCGACCCCGACATCTTCGCGGGCCGGCGACGTG  
GCCTCCTTCCACCACGCCCTCTTCGACACCAGCCTGCGCGTGGAGCACTGGGCCAACGCCCTGAACGGCGGTCCGGCCG  
CCGCCCCGCGGATGCTCGGCAGGGGCTCGCCACGACCGCGTGCCCTACTTCTTCACCGACCAGTACGACCTGGGCAT  
GGAGTACTCCGGCTGGGCGCCGGCCGGCTCGTACGACCAGGTGGTGATCCGCGGGGACGCGGGGAAGCGCGAGTTCAT  
CGCCTTCTGGGTGAAGGAGGGCCGGGTGCTGGCCGGGATGAACGTCAACGTGTGGGACGTACGGAGCCGATCCAGCA  
GCTGATCCGCTCGAAGACCCGGGTGGACACGGAGGACCTGGCGAACCCGCACGTATCCCTCGAAAGCCTCGTCGCATAG  
TTGTCGGTCCGCCCCCGTAGACTTCACGC

SCO2536 CCGGATACGGCATCCACGTGTGATCAGGCGCCGCAGCCCTCGCACATGTCCCGCTTCGACGGCTCCACCTCGGCGGC  
GGGCGGGTTACGCCCCGCCAGCACGTACAGATGGCGGCGCTCGGTGTTGCTGAGCCGCAGCACCCGGCCGACCGCGTC  
CAGCACCTGCGGGGAGACGGAGATGTCGCGGCCCTGCTCCAGCCACTGGTACCAGGACGCGCCACCCCGGCGAGCAC  
GGCCACCTCCTCGCGGCGCAGCCCCGGCGTGCGGCGCCGCGCCCCGCGGTCCGGCAGGCCGACCTCGGCCGGGGACA  
CCCGCGCCCGGGCGGCTCATCAAGAACTCCCGCAGCTCACTGCGGCGCCGGTCCCGGCCCGCGGTCCCGGCCCTCGTGAT  
CACGTCCGGCACGTACGCACTCCCCCGTAGCCAACCCGCCGGTGCCTGGTGGTGGCACCACCAGAACAATCGGCGTCT  
CCCCACAATATTCCGGGGGGCCGAGGCTC

SCO2551 TCGCAGTTGCCAGCCCCTTACCCGGAACCACTCCTTGCCGTCCACCTTCGCGGTCAGGTTCCCGCGCACGCAGGCGCC  
GTTGACGACCTTGGTGACCTTGCCGTGACGGTGTGCTCCTGGCCGGCGTCCGTCTGCCCTCGCAGTGCACGGAGGCG  
ACCGCGTTCTCGCTCGCCGAGGCCGTGGTGCCCTTGTGCGCGTAGGAGGCGGTGCAGGTGAGCCAGCGCACCTCCGCCT  
TCTGCCGCTGGAGTTCCCGGGTCACGGTCTGGTCCGTGCTGTAGGCGACCGTCCGCGGAGCCGAGTCCGCCCGGCTCGCA  
CGCGACGAGCCCGCCGACGGCGACGGCCGAGCCGACGACCACCGGAGCCATGCGCCGAATCCGCCTCAATGCCCCCAT  
GGAGGGCAGCCTGCCACCGCCCCGGGGCCGGCGGTAGGGCGCATAACGGCCACTCCTCACTACCGTGGGCGCCATGGGC  
AACGACCGCAGGCAGCGCAGGCTCGTC

SCO2564 AGTACCTCGGACTCGGCAACGGCATGGAGGGCGAGACGCGGGCGGCCTGCCGCGCCACCACCGAGCTGCACCGCGACG  
ACTTCACGGTGAGCTGGCAGACGATGCTGACCCGCGGCATCGCCGTGGTGGGCCCCAGCATCCGCATCGACCTCGACGT  
GCAGACGGTGCCCAAGGGCTGACCGTGCCCGGGGCTGACCGACAATGGCATCCGTGAGCGACGTGAGACATGTACTGGT  
GCTGCCCGACCGCGACGCCGCGGAGCAGGCCGCCAGGAACCTCGGCGAGCGGTTCCGGGACCGACGAGGAACCGCGGAT  
CCTGAGGGACGCCCTGGCCGGCGAGGACGACGCCGAGGACGCCAGTGGCTCGTCTCCTGCACGACGAGCGGGGAAGC  
GCTGGACCCCGGTGAACTGGACGCGTTCCGCGGGGGAGTGGGAGGGCTGGCGCGAGGAGCCCTAAGCCGCGGGGCCCG  
TCCGGCAGCGGCCCGTCCGGCGTTGTCAGTC

SCO2602 CAGGATCAGACACATCCAACCGAAGTGACACCCCCAGCGGGCCAGGCGATCATCCGCGTCAGCGGATCACTTGGATGCTG  
GGTAGCGGGTGCTCCCCTCGCCAGTCAACTCGATGAGGACCTGGCGTGCGAGAGGCCGGCCTGGCTTCACCCGGCGT  
CGTCGGCCAGCGCATCCCCTGTCCATCGGTTCCGCTGCTCGTAACCACTCATATCGGCGAGCAGCACATCGATTTCTCGG  
GGCCCCGGCAGCGGCGTTCCCCTGATCTGGTGGCGCTCCACCAACCTGTCGGCCATGCGAAAGGCGTGATCGAAGTCAG  
CGCGAGCCGAACGCCCGCCGCTAGCGGGACATCCTGGTCACCGCGGTGCAAGCGGCCGCGCACGAGGCAGCAGACATG  
CCCGGACGCTGTCAGGGAGGGGTACGGTCTGGTCTGTCGCCCGCGCGTGACGGGTGGTTCAGCCGGGGACGTGTGCCGTT  
CGACGCGCGCGACTGGGGAGCGGGGT

SCO2728 GGCAGACGCTGTTCCGCGCTGCTCACGGGCCGGGACCGGGGACGGTCGGGTGCGGGTCTCGGCCATGACTCCATCCCAG  
CAGCCGGGCGCCGCGGGCGCGCCCGACACTGTGTCTGCGGTTTGGGTGTCCGCGTAGACACGTGGGGCAGTGTGGGCG  
GCCCCGCTCGGGACGCGAGGTGGGAACCTCCGGCGCGGAGCCGGTGCAGCGGGGAGTTGGCGCTCGTGCCTCGCTC  
CTGCCAGGGCGAGGCCGCTTCCCAGCGCCGGAGGCGTTCGGTGGGGGAACCGGCGCCCCGGCCGTGTGCCGTCGGGT  
CGTGCGCCATCGCGTTCCCTCCTTGCCGCGCCCTTGCGTCACCCCGGTTTCTAGCCCCGTGCGTGCGGCCTGTCAATGT  
TTTGTCCGACATTCCGACGACGTAGTCCGAGTGGCGGTGGAGGGGCGTACGGCGGAACACCTCCGTCCGCCGACGTCA  
ACGCGCCGCGCCTGAACGACGGCGTACGCCT

SCO2835 CTCGACCGTCACGGACGTATCAGTGGTGGGTCACTGTCACCACGGCATGCACACCTTATATAGACATGGAATGGTGACCCC  
CGGTTGCATGATGCCCCCTCGGCATCCCCTCGGCACCCCGGCCGCCAACCAGGAGGTTCTACGGCGTTCGTCATG  
ATCGCAAGACGTCCCGGTCCCGGACACGCCGAAGGCCCCCGTGTGATACGGAGGGCCTTCGACCGTCGGTGCGCCGCCA  
GGGACTCGAACCCTCGGACCCGCTGATTAAGAGTCAGCTGCTCTAACCAACTGAGCTAGCGGCGCCTGCTGACCTGCACAA  
CTCTACCGGACGCCGACCGGTGCTCCGGACCATGCCCGCGGCACCCGCGGGGCCGCCCTCGGGCCGGGTACATCATTC  
GGACCGTCAACATGCGCGTGCTGACGACAGTTGCCAGACTGACCGAGATGTACCGAACCGTACCGCCGCGGACCTGCCG  
ACCGGGAGTGTGAGGGGAATCGC

SCO2854 TGCCGTGGGGACTGAGCTCGGTGCCGCGAGTCCGGCGTGCCAGAAGGTGCGCATCGGCTCGCCGCCGAGCTGCTCGCGCC  
CCCAGATGCCGAGCGCGCGCAGGGCCGGCCACAGGGCGATGCCGCGTTCGGTTCAGGACGTAATCGTCCCAGGGTCCGGC  
ACTCCTGGTACCTGCGCTTCTCCAGGATTCCCTCGGCGGTGAGCGCCTGGAGGGCGTTGGCCAGGACGGCGCGCGGGAT  
GCCGAGGTGGACGAGGAAGTCGTTGTAGCGCCGGACGCCGTAGAGCGCGTCCGGATCACCAGCAGCGTCCACCGCTC  
GCCGACGACCTCCAGTGCAGCGGGCGATCGAGCACTCCTGCGTCCGCTAGTCCCTTGCCAGTGCCATGCCGTCCACTGTA  
GCCACTTTCCGCTCCTCGGTTTCAATCACCGAACCGAGCGGTGCTAGGTTGGGCCGCCCGACTCAGTTTCAATGACCGAACCAA  
CGGACCAAGCCAGAGCGGACGGCAGCC

SCO2923 ACGGTGCCGCGGGCGACCCCCGCGCCGGGGCCGCGGGCTCCGGCACGGCGGGCACGGCGGGCACGGCGGGCGGGGCTC  
AGGGGGCTCGGCGGGCGGTGACCGTCCCGCCCAGGACGCCGCGGCGCCTCCGGCACGGCGCGTCCGGACGCCCCGG  
CGGGTGCCGCGCCCGGCGGGGGCGGAGGCCGAGGCCGGCAACACCTTCGTCTTCCGCGGGCCACGGCGGGACGGCAG  
GACGCCCCCGCGCCCGCCGCGCGCAGGACGAGGGCACCATGACCTTCCGCGCGGTACCCCGCGCACGGGCCCGCGC  
CCAGGCGGCCCCGGTTCTTCCGGTCTGCTTCGTCCGGTCCCGGTCTCTTCCCGGCTCGGGTTCCGGTTCCGGTTCCG  
GTCCTGTGCCCGGCGCCGGTGCCGGTGCCGGTTCGGACCCGGCTTCGGTGCGGGCAAGGCGGCGGCCGCGCGGGCC  
GCCGCCGCACAGGCTCCGACGCCCGCCGCCCCCGCG

SCO2938 CTCAGCGCCCGGTAGGCGCGGCTCAGCACGGTCTCGGCGGGGGCGGCGGGGGCGAGGGCGGGGCTCGACGGGGGCCG  
CGACATCGGTGTGCGGGGGCTCAGGGACGGTCATGGTCGCCAGAGTAAGGGCCGCGACCTGCTTTTACCCCTGTGGGA  
GGCGGTACGGGACCGGGACCTTGGTTCGTACGACCCGGCGGCCCGGTTCGGGCGTCCGTGAACGGCGTACGGCAGTCGTG  
CTGCGGCCCGTCCGGAACCCTTGAGCGCCTCCCCGCCCCGGTTCATGGCCGCCGAGGCACCGAGTCACGGACCCGGCCG  
TGTGCCCGAGTGGCCCAGGGGCTCGCCTGCGCGGCGCCGGTTCAGCGAGTCCGCGCGCGGGGAGTCACGCGGGTTCTGA  
ATCCCGCCCCGGCCTCCACCAGCCCGACCGGCGCGCGCATCCTCCACGGTCCGACCCCGGACCGGGGCGTGTTCGCG  
CTGGAGCGCACTTCAACTCGTAGGTTCCGAGGC

SCO3168 CCGGGTTCTGGTGCAGCGCCATGGCGACGCCCCGCATCAGCGCGGAGTTCTGTTCCATGGTGCAGTCGTCCTCACGCAC  
CATCAGGGCGTGCAGGTCGCCGCGGAGCGACCCGGTGTGCGACGTCGCCGATCTCGCCGGGCTTGTTGTGCCGGATGGC  
CTTGACCACCAGCTCCGGCTTGCCGCCCCACTGGCGGTAGAGCGTCGCCTTGCTGGACCGGGTGCGGGCGGCCACGGC  
GTCCATGGTGAAGGCGTCGTAGCCGACTTCGCGGAGCAGGTCGAGCACGGCCTCGTACAGCTCGGCCTCGCGCTCGGGA  
GTGATCCGGCTGCGGCGTGCGGTGGCGGTCTCCGTTCATCTCGCTCACTCCTCTCCGTCCGGTCCGGCCGGTCCACTCGAC  
CGGAACGACACCGTTTCGTACATGACGAATGTACCCAGCGCCTAGCGAAACGAAACGGTTTCGTTTCGTGGTCTGGGTCA  
CGGTTGTCGGCACCGCATAAGTTGCCG

SCO3183 TCGCCGAGCAGGACCGCGAAGGGCTCGTGGCCGACGTGCGGGGCGGCGCACAGCACGGCGTGGCCGAGGCCCTTGGG  
GTCGCCCTGGCGGACGTAGTGCATCATCGCGAGGTCGCTGGATTCTGGACCTTGGCCAGGCGGCTCGCGTCGCCCTTC  
TTCTGGAGGGCGGACTCCAGTTCGTAATTGCGGTTCGAAGTGGTCTCGAGGGGGCGCTTGTTGCGGCCGGTGACCATGA  
GGACGTCGCCAAGGCCGGCGGTGACGGCCTCTTCGACCAGTACTGGATCGCCGGCTTGTCGACGACCGGCAGCATCTC  
CTTGGGAGTGGCCTTGGTGGCCGGCAGGAACCGGGTACCGAGACCGGCTGCTGGGATGACAGCCTTGCTGATCCTGGGG  
TGGGACTGAGTCATGCGCGCCACCATATCCGGTGCCTATTGGGAGAATCTGTGTGCGCTGAGCCTCTACGCTCATATGAGC  
AGATCAGAGTGGTACGGGAGTGATCA

SCO3256 GCCTCGCCCAGCTCGGCCGCGCCGCCGGCGTCTACCTGGAGATCTGCGGGCAGCGCTTCGGCTCCGAACTCGGCAAGG  
GCATCACCATGCTCCGCGCCCAGCTCACCGGCCGCACCGCCCACCGCGTCAACGACGAGACGTCCGCGAACATGGCCTT  
CGGCGACATCGCCCCGGACGCCGTCTCGCCGCCATCCAGATCCCCGCCGAGACACGCGGAATCGCCATCGCCGGGGAC  
TCCACCGGCGGCTGGCACCCGCATCCGCGCCCCGCACACCACGCTGCGCCAGGCCGTGAACCTCTGCAACAAGCACGCCG  
ACCGCACCCCCGAACTGCCCGCCCTCGCGCCCTTCCGGCCCCGCGGTGCTCCGCTGCCCTCGGCCCGCGTGCCGCTGTC  
CAAGACAGCCCCCGCCACCGCCTGACTCCTCCCCCTCCACGGTCGGCGCGACCGTCATTGCGGCCAGGTCCCTACCCC  
CGCCATGCCTGACAGGAAGGAGCCGTG

SCO3284 GTCCCCCTCGACCGGACGCCAGCCGGGGCGGCGCAGCACGAGCAGCGGGACCCCGGCGGTGGCGGGCGGCATGTGCCG  
CGTTGCGGGTGATGGTGCCGGCGAAGGGGTGGGTGGCGTCGACGAGCAGGCCGACGGCGTGCTCGCGGAGCCAGGCG  
GCCAGTCCTTCGGCGCCGCCGAAACCACCGACGCGCACCTCGCCCCGGTGGCGTCCTGGGCGCGGAGACCCGTCTGCC  
AGGGAGGTCGTACGCGCGGCCCGCCGGCTGCCCGGCCGCCAGCAGTTCGGCCAGGCCCGGGCCTCCGTGGTGCC  
GCCGAGGATCAGCACGTGCACGGCAGTCCGTCTCCCTCCTCCCGGTCCCCGCGGTTCCCCCTTCAGCGGGTTCGCGCGG  
TTCCCCCTTCATCGGTTCCCGCTTCTCCGGTCCCCGCTCTCCGTGCGCGTCGAGCCAAGCACATCCTCCGGCCGAGTTG  
CCGGACGGGGCCGATGCGAGAAGGTGAGGAAG

SCO3292 TACCGGCAGGCGGTGCTCGACCAGTACAAGCTCTGCGTGGAGATGGCCGACCGGGTCAAGTCCCCGGCGGAATCTGACCA  
ACACGTTCTTCTGCTCGCTAACAGCGCGGTGGTCCCGTGGTGGCCGCGGTGTCGGGCGGCGCACTGGCCGACGCGTC  
CGTCCCGCTGCTGCTGGCCGGGCTGGTCATCCTGCTGGTCCAGTGCGCCGCCTGGTACGTCATGGTGCGGTGCTACCGA  
CAGCTCAACCGCGCCAAGTACGCGGTGATCGGCGCCTTCGAGGAGAGGCTGCCGGCGTTCGCGTACAGCAGGGGGGAG  
TGGGGCGCGCTGGGCGAGGGCCGGGACTGGCGCCGGTATCTGCCCTGACCTACGTCGAGCAGTGGGTCCCGGTGCTC  
TTCGCCGGCTCCTACGTGACGGGCTTCTTCGCCCTCGTCACCCGGTGAGCCACGGGCCGCGATAGGATCCGGGGCCTGC  
CACCAGGCCATCGACAGAGGGGGAGAGC

SCO3308 GCCGGAGCCGGAGCCCGATGCCTTGTCGTTGCCGGCGGAGCCGTTTCGAGGCGGTGGATCCGTTTCGAGCCGGTGGAGCC  
GGTGGATTCGTTTCGAGCCCGTTCGATCCCTCGACACCCTTCGCGCTGCCCGCCGGCTGGACGCTGTTCCCGTCCGCCGAC  
GCGGAGGCGGTGGAGTCGGGTGCCGGGGAGCCCGTGAGTTCGTCGCCCTCGCAGGCCGTGAGGGAGAGCGCGGCCAG  
CGCGACCGTGGTGGCGGCGAACAGGGCGGGTACGGGTGATGCGGCGTGCGGACATGGAAGTTCTCCTTCGTAAGTGGGG  
AGTTGAGGCGAGCCGTCGACCGTTCTCCGGGAGCGGCTGCTTTGATGACCACAGCTTTCGGGCCGGGTTTCGTCACAGCC  
GCCAGCGGTGGGCGATCATGCGGGACAATGGGACGCCAGGAACGCCCTGACCTGCGGGAACGACGTCCCTCTGGGATGC  
GGTACGGGGATGCGAGGAGAGGGGAGGAACG

SCO3314 CACCGTCTCGAAGCCGCGGTTCGGTGACCAGCGTGGTGCACACCTTCCGCAGGAGCGTGTACAGGCCGTGTCCCGGGTTCG  
GGGTTCGGCCAGGGCCTCGTTCGAACGCGGCCGCGCACACGGTGTAGCTGGTTCGTCGAAGGCCGCGGCCACGAGGGACGAG  
CGGGTGGGGAAGCGGCGGTAGAGGGTGGCCACGCCGACGCCCGCCGGCGGGCGACCCGCGCTCATCGGGGCGTCGAC  
GCCCCGGGCGGAGAAGACCTCGCGCGCGGCCCTCCAGGACGCGTTCGCGGTTGCGGCGGGCATCGGCCCGCAGCGCGTC  
CGGCGCCGGAGCCTCCCCGGTGGTGTGCTCCGCGGGGTTGTGAGAGGGCTGGTCAGGCATGTTTCTCACTTCCGGTTAA  
GTGGAGGGCATCGTCCACTTACGTGTCTAGCGTGAGATTAGCAGCGGATGCGGGCTTCGCCTCCGCACGTCCCGAACGC  
GACGTGGGTCACGAGACATGGGTGCGAGAC

SCO3321 ATGTGCTCCGGTCTCGAACCCGGCCAGCCGGAACCAGGCCCTGCTGCCAGGCCGAAGCGGGCGAGGTCGCGGGTCTCG  
AAGAACTTCCGCTTGTACAGGCCCGGCCGAAGTGGAAGATCGCGGCCCTGCATGACGGTGTGTCGAGGTCGAAGAA  
CGCGGCCGCGCGGTCTCGCCGTGGACCGGGAAGTCCGGTTCGGCGACTCCGGAGCCGGGGGTGGTTTCTGGGAGGT  
CCCGGCGGTCTCGGCGGCTTCCGCGGACTTGGCGGGCTGCCTCCGCCGAGGCCCTCGCCTGCCAACACGCTCCGCGCCGT  
GGCGGAGCGCTACGGGGAGTGAGCCATCGAAGAGCGGCCATGCCAGTGAGCATAGCCAGCTTGTTCCGGATGCTTCGGA  
GCCGACGGGTTGCGAGGCTGTGAACTCCGGGCGGCGGTGCCGTTAAGCGGCCGTGCTGCGAGGGGCTCGCCCTCGGTCC  
CACCCGCGCTCGCGCCGGCGCGCGGAGA

SCO3391 ACCAGCGCAGCTGAGCCAGGGGCGCCGCGCACAGGCCGGTGGCCAGCGCGGTCCGCGAGGCCAGCGGGCGCCGGTC  
GCGGCCACGGTGTAGATGATCACCAGGAAGGCGAAGTCCGGCGGGCATCGTCGAGACGTCGAAGGCCAACTGCCCCAGGC  
CGAGCACGACGGCGAGCAGCAGCATCCGCTCCGGCGCCCGCTGGCGCAGCGCGATCACCACGCTGAGCAGCACACGA  
AGGGGACGATCAGCGCCACGTTGTCTGTCCCGTCCGCCCTGGTCCCCGGGGTCCCGCGGAGACCAGGGAGACTCCGA  
GCACGACGAAGGCCCAGAACGAGTCGACACCGGTCGGGTGTCGGCGGAGGAAGTCGTAGAGGCGCTGCACGTAACCCAG  
CGTAGGGAAGCGGAATAGGTGCAGGGGTCAACCGGAGGGCCGATCCGCATCGCCCGCGCATACTCCGCAAGGTGGAGG  
GACCGCTCTCCTGTACCCCTAGCCTGGGCTT

SCO3410 CGCCTGGACCGCCGCTGTTACCTCGACCGCCTACCCGACCGACTACGGCTTCGTCGAGAACACCCTCGGGGAGGACG  
GCGACCCGCTGGACGCGCTGGTCATCCTGGACGAGCCGACCTTCCCGGGTGCCTCATCCGCTGCCGCGGATCGGCAT  
GTTCCGGATGACGGACGAGGCCGGCGGCGACGACAAGCTGCTGTGCGTGCCGTCGACCGACCCGCGCGTGGAGCACCT  
GCGTGACATCCACCACGTGTGCGAGTTCGACCGCCTGGAGATCCAGCACTTCTTCGAGGTCTACAAGGACCTGGAGCCCG  
GCAAGTCCGTCGAGGGGCGCCGACTGGGTGGGCGCACCGAGGCCGAGGATCGAGCGGTCCATAAGCGCTTCA  
AGGACCAGGGCGGCCACTGATCAGGCGCCTCTCCCGTAACGGGCCGACGCACACGCGTGCGGCCCGTTCGTGTTGAG  
TGACCATACTGAGGTCAACAGGAGGGT

SCO3436 GCGAGGAGGTA CTGCTGGCCGTACCGGT CGGGCATCGACTGGCCGGCCGGGAGCGGGT CGCGGTGGCCGAGCTGGCC  
GACGAGGACTTCGT CAGCACCCGCCCGGCCACTGGCAACGGGCCCTGCTGGAGCGGCTCTTCGCCCGTGAAGGGCTGG  
CACCGCGCGTGGTCTGCGAAGGCGACGAGGCGGCCACTCCCGAACTCGTCGGGGCCGGTGTGGGCATCGGCCTGA  
TGCCGGCCGTTCGCACGCCGCGTCTCGGCGAGGACGGCCCGGTTCGGCTGGCTGCGGGCTGGACGCCCCGGACTGCCACC  
GGACGCTGACCCTGGTGTGGCGCCGGGACGCCTATCTCTCCCCGCGGCCCTGGACTTCCGCCGGCTGGCCGGGGAGC  
GGCTCATGCCCGACGTGT CATGAGTACATGGCGAAGCCGGTTCGTGGACGGCATGAGAAACCCGCCCTAGCGT CGAAGG  
CAGCCACGGACGCGACCAGGGAAGGCGGACG

SCO3541 GCGGCGGACGAGACGGCGGTGCTTCCGGCGGTGCAGCCGCGGGACGCCGACGAGACGGCGGTCTTGCCGCCCGTTCG  
CGGGGACGACCCCGCCGACCGGGTCCCGCCGGGCTACTTCCGGGAGGAGAGCCCCGCCGAGGAGGCCAGGACCGCA  
CGCGGGAGCTGCCCCAGATCGACCCCGACCAGGCACCGCCGTCCCGCAGGCGCCGCTCCGACTGGGCCGAGGAGACCC  
CGCTGGACGACCTGCCGACGCTGGCGGACGAGCTGCTCGGGCCGCACGACGAGGACGAGGGCGGCCGGGACGACGAG  
GGCCGCGGCGGCCGGGGCAGGGGCCGGGACGACGCTGAGAGCACCGAGGCCCGCCGCGTTGTCAGTGCCGCCCCGCA  
CAATGGAGGGCGCGCCCGGATCAGCGCGGCGGCTCGGTGTCACGGCTCGGTGTCACGGCTCGGTGTGACGGCTCTGT  
GTGAGGGCTCGGTGTGAGGAAAGGACGGCGTGACCC

SCO3616 GCTCCCCGGCGGT CAGCAGCATGT CGAGTTCACGCCCGGCAGGGATCGGGGAAACCTGCTCGGCGAGATCGATCAGCTC  
GTCCGTCTGTGTCGCCCATCGCGGAAACGACGGCGACCACCTGGTTGCCGTTCTTCTTCGTTCCACGATCCGCTTGGCGA  
CGCGCTTGATGCCCTCGGCATCGGCTACGGAGGAGCCTCCGTACTTCTGCACGACAAGGCCACAGTGCCTCCTCGCTCA  
ATCCGTCTCTTTCCGCACGTACGTATATGTA CTGCGGTTCGGCTCATTTTACCGAGCGTCCGGGTTTACCCCTGCGGTATC  
GCATGGTGAGACTCCGGACCGCCCGCTGTTCCGGGTGGCTCATGCCAGGGGGACGCGGGTCACTCGGGAAAGTGCGG  
TGTGTCACACGTTACAAGTGGCTTCCCGCCACGTGGAAGACCGGTTGGTGGAACGCACAACCCTTGCGGCCCTGGTG  
AGTCCGACCCCGGGGCGTGCG

SCO3624 TCGCTGGCCGCCGACCTGCCGGGCGGACCGGACCCGGCCGATCCGCGCATCGCCGCCGCCCTCGCCGGGGTCCGCCG  
GCGCGGCGAGGAGGCCAGCGCGCCGCGCGGCCGGGGACCTGACCGTCTGATCGGCTACGACCTGCGCTACTGGCG  
CGAGCTGGCCACCCTCTTCGGCAACCCTACCTCTGCGACTTCTGCACCGGCTGCGCGTGCAGAGCTGGGTGTGCACC  
GTGCAGCACCTGCGCCGGCTCAGCGAGCTGCGCGGCGCGTTGTGGTCCGGGCACACCGCGCTGGTCGACGCCCTGGCC  
CGGCGGACGTCCCGGGCGCGCGTGCCTCGTCGACGCGTACAACAGCCACTCGCTCGCCCTGATCGAGGGGCTCGCC  
GGCGAATGACCAACGCCGGACGTGTGCTGGCCCGGCCAGATGGGTATGGGTTCTGCACGCGACGCGCCCGGCGCA  
CACCGACTACGCTGCCCTGACCGCCGTGCTGT



SCO3636 CGCGTCGCCGCCGCTCCTACGGGCCCGTGCCCGTGCCAGCCGCTCCTCACGCTGCCGCTGTGCGCGCTCGCGCTGCCT  
CGCTTCGCGCACCGCGTCGTTGTTCCACCGCGCGCACACGGGACGAGCGCCGCGGACGACACGAGAGCGAGCGCCAC  
GATCCAGTGACCGAGGGAGGTCCCCATGGCCAGGGCGACCACGGCTCCCGCGACCGCGCCGGCCGAGTAGCCCAGAGC  
CGGACGCCAGTCCCTGCGGTGGAAGCCGGCCTTGAACGGGACGACGAGCGGGACGGGCGCGATCATCAGCGCGGGCGAA  
GTACTTGCCGCCGCCCTCCGGGACACCGCAGCCTCCCCTCGGATGCGGGCGCGCATCCCACCGTCACCGACCCGGCCAGT  
CCCCACCCGAACCACAGTGCCAGTCCCGCCGCCAAGGCGGCCCCACCCATTTGGCATGCATCAGCGGAGTGTATGCACC  
GGCCGGGCCGGCGATCTATCGTCCGTCC

SCO3637 GCCGCTCCACGGTGC GCGGGCGTGAACGCCTTCGACACCAGGCGCCGATAACGGGTGTGGTCCGGCGGGCTCCAGGTCTGA  
GCATGCCGTGGTTCGTTGAGCGTGTGGAAGGGCTCCTGCTCCGGCGGGGGCGGCGTGC GGCCGAAGTCCTCGTGCGTGA  
AACGGTGTGTTAGGTCCGGCCGAGGCGGCGGTGCGCGCAGCAGCGCGGAGACGTCCGCGTGGTGCGGGACCAGCCACT  
GGTCGCTCGGCTCGTAGTAGAGCACGCGCCCCCGGGCCCGCAGCTCGGCGAAGGCGGGGTAGGGGTGCGGCGACGAAG  
GCGGGGTCCCACGGGTGGAACGCGGGACCGGACACATGGGGACCATCGGTTGCAGCCGTCATGGACGGACGATAGATC  
GCCGGCCCGGCCGGTGCATACACTCCGCTGATGCATGCCAAATGGGTGGGGGCCGCTTGGCGGCGGGACTGGCACTG  
TGGTTCGGGTGGGGACTGGCCGGGTGCGGTGACG

SCO3697 CTCTACGGCCTCCTCTTCACGATCGTCATCCTCTTCGCCCTCCAGGGCAAGACCATCACCTCGCAGCCCTTCGACGTCGCC  
CGCATCGCACTGCCGCTGCTGGTGTACTTCGCCGTGATGTGGGCCGGGACCTTCCTGCTGGGCAAGGCGATCGGCCTCG  
CCTACGACCGCACGGCCACCCTCGCCTTCACCGCCGCCGGCAACAATTTCGAGCTGGCCATCGCCGTCGCCATCGCCACC  
TTCGGCGTCACCTCCGGCCAGGCCCTGTCCGGCGTTCGTGGGACCGCTCATCGAGGTGCCCGTCTGATCGGCCTGGTCT  
ACGTGTCCCTGGCCTGGCGCAGGAAGTTCACCCCGTCCGCGCCGGCCACTGAGGGCAGGGGCCACTGATGCACCCGCAC  
GGTCCGGCGCATCACGGGCACGGCGGGCGGCGTGGGAGGTGCGGGCGGCGGGAGGTGCGGGCGGCCCCCGGAGGTG  
CAGGGGGCAGGCGTGGCAGGGGTGGC

SCO3927 CATCGGTGTGACGAGCGGATCGGTGTACGGGCCCGAGGTGTGCTAGAGCGTGACCGACTGCCCGTTGGTGAGGTGCAC  
CTGACGGACCGGCACCCGCAGATCGGGGCGCGAGCCCTCGACGTACGCCTTGTGCCAGCCGATGGACTTCCCGGCCTCG  
GTGTCCTCCGCGGTGTCCGTGTTCTCCGCGGTGTCCGCCTGGGCGGTGTTCTGCGTGGAGGCAGGCGTGC GTGCGTCCT  
TGATGGTCATGAGACCTACTCCCTACGCCGGCATTACCCGGTAACAGGTTCCGGCGGTGACGCAGCGGCTTCCGTCCGT  
GACGCTTCGTGGGATACGTCACTCGACTTCGGTGACGTTTCCCCTGAAACATCGCTGGGACGGAGGTCAGCGCCCTCTCA  
GCCCGGTGCTCCGAGCTCCCGCGTGTACAAAGGTGCCTCCACGCTAGCGCCCATTCGGGCGCGGTGAACAGAGGGCCCC  
CCTCGTTCTTGCGATGATCGGGCG

SCO4082 GCCCCGGGCCCAAGGAGGGCGACCTCTGGGCCCTGGAAGGTCTGAAGGAGCAGTTGGCGGAACTGAAGGCCGCGGCC  
GGGGGTGTCCTGTTACCGGCTCCGTCCGGCTGCCGACCGGGGAGCTGTACGCCTGGCAGCACGGAGCGCTGACCCAA  
GGGCTGCTGGACGCCGACTGGGCCGAGTCCGCCGAGGTGTTCCGCCGCTGGGGCATCCCGTGCGGCTGCGGCTGCTG  
CGGGAGGTGCTCGGAGGGCGGGCGCACCCGCCCGAGCTGGCGGAGCTGGACGGGATGGGCACGACCGGCCAGATCTA  
CCACCACCTGCGCCAGCTCACCGGCGCCGGCTGGCTGCACACCACCGGACGGGGCCGCCACGAGGTGCCGCCGGGGCG  
GGTCGTACCGCTGCTGGTGGCGCTGTCGACCGCACGGAAGTGAACGGGACCGCCAAGACGGTCAGGACCGTCAGGAGCG  
TCAGGACCGTCACGAGCAAGGGGGAACGAACG

SCO4093 CGCGTCCGGCGAGGCGGACTTGACCCGAGCGCGTACCCGTACCCGAGGGAGTGCAGCCGCGCGTCTCGATCCCGAA  
GTGGTGGGCGATCTCGTGAACGACCGTCACCTCGGTCTCGGCGACCACGTCTTCACGCGTCGCGCAGAACCAGCGTC  
GGCCCCCGGTAGATGGTATCCGGTCCGGCAGCACGCCCGCGTACCACTCCCCGCGCTCCGTACGCGGCGTCCCCTCGT  
ACAGCCCGAGCAGCTCGGGATCGTCCGCCGGCGGTTTCGTCTCGACGAACACCGCGACGTTGTCCATCAGCCGCGTCAG  
CTCCGGCGGGATCCGGTCCAGGGCTTCGGCGACCAGTTCCTCGAACTCCTCGCGCGTCATCTCCAGCACAGGACCATTTGT  
CGGGTACGACCGTGGAGTACGACCCGCATATCCGCCCGGGCCACGGGCATACGGGACCAATGGCCCGCGTCCCCGCC  
GCAGTCCCGCACGCCCTGGCCGAGGTG

SCO4095 GCCCGGGGCGGATATGCGGGTCGTACTIONCACGGTCGTACCCGACAATGGTCCTGTGCTGGAGATGACGCGCGAGGAGTT  
CGAGGAACTGGTCGCCGAAGCCCTGGACCGGATCCCGCCGGAGCTGACGCGGCTGATGGACAACGTCGCGGGTGTTCGTC  
GAGGACGAACCGCCGGCGGACGATCCCGAGCTGCTCGGGCTGTACGAGGGGACGCCGCTGACGGAGCGCGGGGAGTG  
GTACGCGGGCGTGCTGCCGGACCGGATCACCATCTACCGGGGGCCGACGCTGCGGTTCTGCGCGACGCGTGAAGACGT  
GGTCGCCGAGACCGAGGTGACGGTCGTTACGAGATCGCCACCACTTCGGGATCGACGACGCGCGGCTGCACTCCCTC  
GGGTACGGGTGACGCGCTCGGGTCAAGTCCGCCTCGCCGGACGCGTGTCTCTTGTGGGTGACGGGAGTTGGGCACGTC  
GACTCCTTGACCCCCGGAGGTGGCCGCC

SCO4105 GGCCCGCACCGCGGTCAGCGCCCCGTTCCAGCCCGAACGCGAACGTGCCGGTCAGGTCGAGGGCGAGCAGCGGAGCGGG  
TTCGGTGCTCATGGGCGCCGGGTACCCCGCCCGGGTTCGTACCCGGTGGGCTCGTCATCTCCGGCGGCGGGCGGC  
CGCTCCACGACGAACGACCCCTTGCCGCGCACGGTACGATGAGCCCCGTTTCGCGGAGCTCCTGCGCGGCCACCGGAA  
CCCACCGTGCAGGCGCCCCACGCCACCGAGCCCGGAGACCCCCAGCCCCACCGCCCCCTGCCCCCGTCCGCCTCCCG  
CAACACCACTCCCCGTACTGCCGTACCTCCCCCTCGACGGCGCCGCCTCCCGCCTCGTCCGCCCTGCGTCGCCGCC  
ACGAGCAGGAACCGGACCGACAGTGGCACCGCCGCCTCGCCCTCGTGTCTCGCCGCCGACTTCGGCATCGACCTGACCAG  
CACGCCGTCCGGTGC GCGGAGGGCGGCCGC

SCO4106 CCGCCCCTGCGTCGCCGCCACGAGCAGGAACCGGACCGACAGTGGCACCGCCGCCTCGCCCTCGTGCTCGCCGCCGA  
CTTCGGCATCGACCTGACCAGCACGCCGTGGTGC GCGGAGGGCGGCCGCGTGACGGCACCGCACACCGCGCTACGGC  
TGCTGCCCTGGCCGTGCGCCGAGGGCAAGCCCTGCTTCCCCGCTCCCGGCGACGGCAGCGGATTCGTGTCCCGGCTCGC  
CGACGAGACGGAGGTCCGGCAGCTCGCCGACGGGCGGGACGTA CTCCGCTCGGCGCGCGGGCCTCGGACGACCCGGT  
GTCCCCGGACGCGGAGGTCCGCTGTACCGCGATCCGGCTGACGGGTGCCTCGCGGTGCGGCCGCGGGTGGCGGAGTCG  
AGGGGGCGGCCCTGTCCACGGGCCACGGTGAACCGTAGCGGCAGCAGCGGCCCTAGTGTGTGCCCGCCGGAACCCG  
CCGCCGTCTGCCTCCCGGGAGTGCCACCC

SCO4501 AGAGCGATCTTGTTGGCGGGCGGCGATCACGGCCTGGAGGCCGGTCCCGCAGGCCTGCTGGATGTCGTAGGCCGGGGTG  
CGCGGGTTCGAGGGCCGAACCGAGGACCGTCTCGCGGGCGAGGTTGAAGTCCCGGCTGTGCTTGAGGACCGCGCCGGCC  
ACGAACTCGCCGACGGCGCCCGGCTCCTGGAGGCCGTACCGCTCGACCAGGCCGTCGAGGGCGGGCGGTGAGCATCTCC  
TGTTGGCGGGCGGTGGCGTACGGCCCGTCCGAGCGGGCGAAGGGGACGCGCGTGCCGCCGATGACCGCGACGCGGGC  
TGGGGGCTGCGGTGCCAGAGGGCTCATCTCGACCTGCTCCTCACCCGTGACATAGGCTTACCTCCGGTAACCTTACTCCA  
GAGTAAGCAGTAGTGGGCGGCACGAGCCCGACCGCCGGCCTCTGGACACTCCCCACGCTCGAACACGCTCGCGCGGG  
GGGACGCCCATCCGCCACCTGGGAGACAGAC

SCO4502 GCCGGTTCGAGCGGGGCGCCGAGCACCACCACCCGGCCGCTCGCGGGCAGCGGACCGTACGACGGGGTGCAGCGCGGC  
GTGCACCTCGGCCAGCGCGTTCGACGTCCCGTACGCCGGTGGCGTCGAGGACGACGGCGGGCGGGGCGGCCGTCTCGTC  
CCGGGGCAGGCCGGTGCGGGCCAGTACGGGCGCGAGGTTCGAGGTTCGGTCTTTCCGGCCGTGAGGTGCAGCAGACCGCC  
GTCGAGCGCGTCCCGCCGACGGGCCGCGGGTTGCGGCAGTCCGAGCCGGCGGGTGAAGAAACGTCCGGGTGCGGTGC  
CGGTGAAGCTGAGATAGCGGTTCGGCCATGTCTGTCTCCAGGTGGCGGATGGGCGTCCCCCGCGCGAGCGTGTTCGAG  
CGTGGGGGAGTGTCCAGAGGCCGGCGGTTCGGGCTCGTGCCGCCACTACTGCTTACTCTGGAGTAAGGTTACCGGAGGT  
AAGCCTATGTCACGGGTGAGGAGCAGGTCGAG

SCO4503 CCTCGCCGAGCGGGAGGGGCGGGGCGCGGCCTGATCTCGATCTGCGCGGGCGGGCGGCCAGGGCGTCACCGCCATACT  
GGAACGAACGTGATTGGGTCTGCCCGGCGGATCAGGTCGCAGGAAAGTCGCGGTGCCTCATCGACGCCGGTGAGCGGG  
GGCTGGTGC GTGCAGCTGCAAGGCGGAGGAGGGAGTCGACGCGGAGCGTTCGGCGAGTGACGACAACGCCGACAGATGTG  
CGCACCAGCCCCGCGTCTGCGGCATGATCCGCCGGG CAGGCCAAACCCTCAGGTAACCCCAACTGCACACGTCC  
GGCGCGGGAAGATCGTGGAACGCGCACCAAGTCCCACCTGGGCGCCGTACGATCCCGGGACTGACCGTCCGGTAACCCA  
TGTCCGCGGAACCGGCATGAACGCCTCGGCGCGCGAGGCACGTACGTATGCAGCAGAGCAGCGACAGCAGAAGCAGT  
GTCTTTGCTGCACGTCCCAGGAGCCGCC

SCO4508 AGGCCGTCGAGGGTGTCCCTTGGCGCCGCGGGTGAACCTCGTCAAGTTGTCGTCAAGGCCTTGGAGGACGACTTCGTGACGTAGCCCCTCGACTCGACCAGGTTGCGCATGTACTTGGCGAGGCCGTGAGCTTCTCCTGGAGCTTTTCCTTCTCCTTACGCATGCTTGGCGGCATCCCGCATGTCCTGATATGTGATGTCAAGGTCTTTGGGCATGAAGCCGCTTCTCACAACGCCGAGGGCCAACCCCGTGGCTCCTCGTGTGCGGATCGAACCGGCGCACCGGTACGCCGGTTCGTATGACACGACCGGTGTGATCGTCCGCTCTGAGGCAGCAGCTTACGGGGGAGGCCAGTGGTGTACATCCCTGCGTTGCCAACGGGAACGTCCGGTACCGCCCTGTTGCCGGACCGCGACACCCAGCGGATATCGTCGCCTGGACTGTGAGCCGTGGTGTGGAAGCGGCCGAGGGCTCGCCTGGGGAGGACAAGC

SCO4523 ACGTCGTAGTGACGGCGGGTGCCGGTCAAGTCCATCCGCCGTGATGCGGGCTGTTGATCTGCGTCTCGGCGTAGTGCA GCCCGTCGCCGGTGGCGTATGCGGCCACGGCGGCGTCCCTTGGCCGTGCGCTTGTGACGCCCGATAGATCGCGCGGATGTAGTTCGCCGCATCCTCCATCGCGGCCGCTTCGTTCTCGTCCCTCGGCTTGTCCCAGTCGAAGACCAGGTTTCATGTCCTTGGGGAGAGACAGTCAAGGCCACTGACGCTATCGACGGGGTTCCTGGTTTCGCCAGTGTGAACCGCGTCAGGAATCGTTACGGTGCTCGGGACGAGTGGGGAACGGGTGAGGGGCGAAGGGGCACGTGACTGACGTCATAGGCCGGGAGCAGGGCTGATCCGTCGTA CTGCGTCCGCGGAGTTGAGCCTGCTGTGCGCCGGGGGCTCGCCGGGACTGTCCTGGCCTGCGCCCGTGCGCCGGAGCAGGTGGGACCGGGCAT

SCO4650 CCGTGGTCTCATGCCGAACCCCAAGACCGGCACCGTGACCCCGGACGTTGCCAAGGCTGTCAACGACATCAAGGGCGGC AAGATCGAGTTCGCGTTCGACAAGCACTCGAACCTGCACTTCATCATCGGCAAGACGTCGTTTCGACGACACCAAGCTGGTGAGAACTACGGCGCGGCGCTGGAGGAGATCCTCCGTCTGAAGCCGTCCGCCGCAAGGGCCGCTACATCAAGAAGGCCGCCCTCAGCACCACGATGGGCCCGGGCATCCCGCTCGACTCCAACCGCACCCGCAACCTCCTCGTCGAGGAGGACCCGGCCGCGGTCTGAGCGAGCAGCTCGCCCCACCGGTTACGGGGCCCCGCACCTTCGAGGTGCGGGGCCCCGTCCCTTTGGCCGTCCCTTTTGGCCCGTCCCTTTTCCGGCGCCCTGGGTTAGCGTGCGGGCAACGGGTCCGCGCATGGGGCGCAGGGGCCGTACGGGGCGCAAGGGGTGGGCGG

SCO4656 GACCGAGAACCGTCGTGTGGTCCAGGAGGGCGGTCACCCGGCCTCCGGTCGTCCGCAGCTGATGGGTATCACCAAGGCC TCGCTGGCGACGGAATCCTGGCTGTGCGGCCGCTCCTTCCAGGAGACGACCCGAGTCCTGACGGACGCGGGCGATCAACGCCAAGTCCGACAGCCTCATCGGCCTCAAGGAGAACGTCATCATCGGTAAGCTCATCCCGGCCGGTACGGGTCTGTCCCGCTACCGCAACATCCGGGTGGAGCCGACCGAGGAGGCCAAGGCCGCGATGTA CTGCGCCGTTCGGCACGGGCTCCGGCCAGGCCGTTCCGCTGGAGGACTACGACTACGGTCCGTACAACCAGTAAGCGGGCAGCTTGATACGACCGAAGGGCGGTCACCCCGAGCGGGTGGCCGCCCTTCGGCGTGC CGCCCCCGCCGTTCGGTTGCTAGGGTGCCGAGCACCTGGGGGGGAA

SCO4658 GCGCCGGGTAGAGCGGGAAGAACGCGACCGAGTTCTGCTGGACCGTGAACAGGCCGTCCGAATCCAGCCGGACCAGGG  
CGGGGCTGTAGCCGTGCTCGGCGACCTGGAGGTACCACCAGCCGTCCCAGGTGGCCAGCACGTCCCACCAGTGGGCGC  
CGCCGCCGAAGCGCGGGTTCTTCCCCCGAAGTCCCCGGCGTGGGTGAGGAGGGAGGCGAAGACCCCGAGGCCGACGA  
GTTTCGTGACGCCGTAGAGCGCCAGCGGGGCGAGGTAGGGCCGGGCCCGGGCGGGAGGGCGGGGAGCCGGCTCCGC  
CAGGAGCGTGCCGCCCCCTCGCCGCCGGCCGCGCTTCGCCGGTGCCGTCCGGCCCCGTCCGTACCGTGTCTCGGCA  
GCCGTGTCCATGGCTGTCATCCCCCTCGGGCCACCCTCAAGCGTCAATTGCTGCCATAAGATCGCACAAGAGTGCACATC  
TGTA CTCAAGGTCATGAGGAGGGAGGCGCG

SCO4733 GTAGACCGTCTCGCCCATGGTCAGCTGGGTCCCAGGGAAGAGCAGGTCCGGGCTGAGCGGGGCCTTGTCCTTCTTGACG  
CTGGAGACGAAGTCCTTCGGGTCCAGCGGCGGGGCGCTGGTCCGGGCGAAGGACGGCTCGGTGGCCGTCCGCGT  
GGGTATCTCCGCGGTGCTGGGGAGCTGGGAGGAACCGCCGTCCGACGCCTGGTCCGAGCCGTTCCCGAGACCACGGC  
CACCGCGACGGCACCGGCTATCGCCACGGTGGCCAGCGCGCCGCCGCGATGAAGAACAGCCGGCGCCGCTTGGCACG  
GGCCTCGGAGGCCTCGGCGAGGGCAGCCCAGTCCGGCGTGTCTCACTGTTCCCGCTGTTCCAGGGCTGCTGCGACGG  
CGGCTGCTGCGATTGCGGTGTCCAGGGATCCCCTGCGACTGAGGTCCCCCTGCCAAAGCTCATGGGCGGCATCTTAG  
ACGGGCCTGTGGGCGTGCTGGTGCCGGGAC

SCO4742 AGAGCACGTAGAGCCACTCGTGGCCCTCGTGGCACCCTGTTCCGGGCGCGGTGTCCACTCGGTGCGCGGGGTGGCCG  
GGGCGGGGAGGATCTGCTTGTAGGCGTGCAGGCCGTGTTGGGGTTCCGGGTGAGCGGGACCCAGGTCTGTCCGTGCC  
GGGTGAAGGGGCGGGGATGGACGCGGGGGTCCCGGTGCGCGAGCCGACGAGTTCGTCCAGGGGACCCGGTGCAGC  
CGGGCCAGCGGCAGCAGGTGCCGACGCCCGGCTCGCGCTGTCCGACTCCAGCCGGGACAGGGTGTACAGGAGATG  
CCGGTGGCCGCGGCGAGCTGGGCCAGCGTGCAGCCGCGGGCCTGCCGATGGCGCGCAGGGCGGGCCCCGAGCGAGGT  
CATCACCTGTGCCGTCTCGTCCCGCCGCTCATGGGACCACTGTCCCCATCGCGGATTCCGGGGAGCGGCGGGCCGTG  
CGTGTTCGCGGTACGGGGAAGACTCGACGGC

SCO4743 CCTTCCGCAGCCCGCCGCTGCCGCCGATCCCGACGATGCCGTGCAGGACCAGATCGGCCCGCGCGATCAACTCCTCGGC  
GGAACCGGCGGGCCCGCCCTCCGCGACCCGTCCGCCCGCGCGCCGACGCGCCGTGAGACCAGCCGCGCGTGCGCCCGGT  
CCGGCGCGAGCAGCACCGCCGTACGCCCGCGCCCCGCGGGCCAGCCGCGCGCCCGGTACAGGGCGTCCGCCCG  
TTGTCCCGCTGCCGACCAGCAGCACCCCGGCTGCCGTAGACCCGCCCGGCCACCCGGGCCAGCACCTGGGCGCAG  
GCGGCGGGCAGCCCGGCCGCGGCCCGTTGCATCAGCGCCCCCTCCGGCAGCCGTGCCATCAGTTCCCGCTCGGCGTTC  
CTGACCGTTTCCACGCTGTACGCAGTCCGCATGCCGTGCAGTCTTCCCGTACGCCGGGAACACGCACGGCCCCGCGCTC  
CCCGAATCCGCGATGGGGGACAGTGGTCCC

SCO4746 CGGCCACGGCGTCAGCTACGGGCACCACTACACCACCCCGGCGAGACCACCCTCGGCCTCGTCCCGCTCGGCTACGCG  
GACGGCATCCCCGGCACGCCTCCTCCAGCGGCCCGTGCTGGTTCGACGGCAAGTGGCGCACGGTCGCGGGGCGGATC  
GCGATGGACCAGTTCGTTCGTTCGACCTGGGCGGGGACCGGCCCGAGCCGGGCGCCGAGGCGGTGCTGTTCCGACCGGGC  
GACCGCGGGCGAGCCACCGCCGAGGACTGGGCCAGGCGGGCACCATCGCGTACGAGATCGTACCCCGGATCGGA  
AGCCGGGTCCCGCGCGTCTACGTCAACGAATGACGCTCAGCGAATGACGGCCGGCGAACGGACGGATGACGGTCGGCGC  
ATGGCGGCCGACGAGTGACACCCCGTTCGGCGGCGTGACGCGCGGGGGCCGCGCTTCAGGTGAATCAGTGGCCGGCG  
GGCGTCCGCACGGCCCGGCGAAGAGGAGCG

SCO4757 TGTCGATCCCGGGCCGGCCCGTTCGACGCAGGGGTGAGAGGCCGGGAGAAGCCCGGCAGTACGACCACCCGAGGAGCC  
ACCATGCCCGCTACCTGTCCCTCATCCGCATCGAGGAGTCCGACGCCGTGCCCGGGCGGCCCCAGCCCGAGCTGATCC  
AGCGGATGGAGAAGCTGATGGAGGAGATGACCAAGGCCGGCGTCTGCTGGACACGGCCGGCCTGACCCCGACCAGCCA  
GGCACCCGCGTCCACTACGAGGGCGGACAGATCTCCGTACCGACGGGCCCTTACCGAGACCAAGGAGGTCATCGGC  
GGCTACTCCCTCCTCCAGGCCAAGGACCGGGCCGAGGCGGTTCGAGTGGACCAAGCGGTTCTGAAGGTGCACGAGGAGT  
ACTGGACGGTGACCTGCGAGGTGCGCGAGCTGATGGAGGGCTGAGCCGGCGCGGGGCACCGGTTCCCGCTTTGTCCCG  
GCGCCCCGAGGGTGTTCATGGTGGGCT

SCO4758 CGGGCCTGCATCTTCTTGAAGTAGCCGTAGTCGTCTTTCGTCCTTCGTCGGTGAGGAAGACGGTGTACGGGATCTTCAGT  
TCGCTCATCATCCTCAGGAACGCCGGGTCTTCTCGGCGCCGTTCGTCGATGGTGAGGAAGACGACCTTCTCCTTGGTGGG  
GACCGTGGTGAAGACCGGCGGGAGGCCGTCTCCTCCTGGCCGTCCACCTCGAAGCCCTCGCGGGCCTCGATCTCCGGC  
TTCTTCGCGGGGGGCGCGGGGGCCGTTCAGCGGGACCTTGTTCGAGTTTCCAGCGCTTGGCCGCGGGCCAGGGCCGCC  
CGGGCCTCGCGAGCCTTCGCCGCGCCGTTCACCGCGCGGGCCGGGGGTGCCTGCTGACCGGGGGCGCCCCGCACGCT  
TTGGTCTCGCCCTGCGCACAGCCGGCGGCGAGGGCGGCGACGGCGAGGGCGGTGGTGGCACGAGAGGCCCGGGACA  
CGCGACGCGATGCCCGACTTTTGTATT

SCO4787 GGTGGAACGGCTCCGGCGGTTCCACCTCTCGCACGTATCCGGCCTTGGTCCGCGGGTCTTCGACCTCGACCGCCCGGCC  
GGCGATCCGCACGTCCCCGCCGCCATGCCGGTGCCGTCCCCCGGGTTCGCTGGAGGGCGAAGCGCGGATCGCGGCG  
CAGGTTCGAGCGCCTTCAGCGAGTCCGGCATCATGCCGAGCCACAGCTCGCCGGTGAGGAACCGCACCTCCAGTCCGGCG  
GTGCGGGGCGAACCCTTTCGCGAGGGTGGCGAGCACGTGGTTCGCGGTACGCGCCGAAGCGTGCCTCGACGGTCCCG  
GCCAGGCCCGGTTCCGGCGGCGGCGAAACCGGCCAGTTACAGGGGAGCCTGAAGTCATACGCCGAGTGTGAACGCCAA  
AACCGACATCCTCTGTTCGCGTATTGGCCCCGACCCTGTCTCCCGGCCGACCGCCGGTAACTTCCGGCACGTAGGGCA  
CATCCGGCGCCGAAGGACAGAGAACAC

SCO5141 TGCTGCTCCTCCCGGTCCGGCTTGTCCATGACGACGTGGCGGTGGGCCGCCGCGGGCCCGGGCGCCCCGCCAGCGCGGAC  
TCCAGGTCGGCGATCCGGGCCTCGCGCTCGGCCAGCTCGGCGCCGAGGCGGCCGAGGGCGTTCGTGACGTTCGGCCATG  
CGGTAGCCGCGGACCACGAGCGGGAAGCGCAGCCGCTCCACGTCCCGCGGGCCACCGGACGGTCCGGGGGCAGCGC  
GTCCCTGACCCGCTCGGGTTCGGCGTTCGGGCAGCGGCCCGCTCTCGCCGCGGCCACCACGGCGAGCGTCACCGCGGC  
CACCACGACGGCCAGCGCGATGACGAGGAACAGGAACATGACCATCGCTGGGCCCCCATGGTTCGGGTTCGGCGTCGGTTG  
TGCCGGAGTCGGTTGTGTTCGGGTCCGATCGTGCCATGCGAGTCTGACAGTCGGGGCCGCGGTGGTTCGAAGGTCCGCCCG  
CCCGGGGTCGAGAGCGGCACGAGAGAACGGT

SCO5321 CCAGCATCAGGACGACCCGCACGCGGGAACCGTTCGAACGCGGATATCGACACGCCACCCGCGTCCGTTCGCCACGGCGG  
GCGACGTCCCGACGTTCGTGTGGTCCGCGTTCGCGTCCGTGCTCGGGGCATCCGTTCGTACGACGGGAGAGACCGTCAT  
CCGGCCCACCTCTTCTCCGGTCATCCTCGTGGACTGGGGCGATCGTTCGGCGGCCCGCCAGGCCGGCGGGGTTCGAC  
GGTTCGCGTAAGCACGATCGTGGGCCGTGCCCGCGGGGACCGCGAACCAGGAGGGTTAAGCGGGTGAAGCCTGCGCCGT  
GGCGGGCCCCGACGGGCCGTACGGGGCATGCATGAAGGCCCCGGCGCACCTCGGTTCGGACCCCTCTCGGACCCCTGAC  
GACTCCTGACGCATCCCTGACGCGCATCTGAACGCGCGTCCGACGCACTCCCGACGCACTTCCGACGCAACCCCTGACG  
GACACCTGTTCGTACAACGGAGGACGAATC

SCO5401 CGCGAGGTCGAGACCATCGCCGTCACCACGCTGCGCGAGCGCATCGGTGACCTGCACGGGGACCGGCGGCTGGGCGCG  
CTGGCGGAGCGGATCGTCCCGGGGAACCTGGATCCGTACCGGGCGGCGGACGAGCTGGTGGCGGGGCTGACGCGGGG  
CTGACGCGGGGGCTGAGCGGTGCGGGGCGGTCTTCCGGCGCGGGGTTTCTTCGCCCCCGCCGCCCTTCCCTTCCCGA  
CCCTGGGGGCGCCACCCCGAGACCCCGCTTTCGGCCTGAACGGCCTCGTCCTCAAACGCCGGACGGGCTGGGGGCTCA  
ACGGCCTCGTCCTCAAGTGCCGGACGGGCTGGGGGGGCTCAACGGTCTCGTCCTCGAGTGCCGGACGGGCTAAAGTGAC  
CCGCGTGTTCCTCCTCTTGGCCTAGGACCCGCCCGCACGCGACCGCCGCATCCGGCCGTTCGCGCGCATCGGTGTCCCC  
TAGTTGCCTTCTGCTGAGGAACCCCTTCGC

SCO5462 GCGGTGTCGATGCCGGCGAAGACCTCGGCCATGAAGTCCTCGATGATCCGGCGGCGTTCCGGTGGTGGACAGTCGTGCCA  
GCTTGTTTCATCAGCGTCGTCTCCTCGGCGGTTCGAACCGCGTTCGCGCCACGGTTCGACAGCACCGCCCGGGTTCACCCTCAG  
CGCGGCGATCTGCGCGTCCAGCGCGCTCACGTGCGCCGCGCGACCTGGGCGACGGTGGTCTCGCCGGCCAGCACACG  
GCGTACGGCGTCCAGGCCGAGGCCAGTTTCGCGCAGGGTTCGGATCAGCTCCAGGCCGGCGACGGACGCGGCGTTCGTA  
GAGCCGGTAGCCGCCCGCGGAGCGGGCGTTCGGGGGCGAGGGCGCCCTCGTTCGGACCAAGTAGCGGATGGTTCGCGACCG  
TGAGGCCGGTGGTTCGGGCGGAGTTTCGCCGATGGTTCATGAGGCCGGTTCGCGTTCGCGTTCGCGTTCGCGGAGTTCGGGCGT  
TCCAGTGGGTGGAGACTCAAGGAGCGCGGT

SCO5551 GCGGCCACCGCCACCACCAGGGAGCGGTGCACGGGGGAGAGCGGTGCCAACTCCCGGGAGGTCTCCCAGCCCAGCAGT  
TCGAGGAGCCGGTCCACCTCGACGCGCGCGGCCACCGCCGGTCCGCCTCGTCCGGCTCGGCGTCCTGCGGCAGC  
GCCACAGGGCCGCCCCAGCCGGACGGTGCGGCCAGTGAGTCGTGTCGACGTGCCCCAGCACCTCCCGGGCCGTC  
GCCACCGGCACCTTCCCGACCTGGATCAGCGCCCGCACCCAGCCGCAGCCGGCGCAGATGGTCCTCGTCTACTCGGCGG  
TGGTCGCGTTGACCTGCCGGCCCGGCGGCAACAGCCCTTCCCGCAGGTAGTACTTGATCGTTCGCGGTGGACACCCCGCT  
GCGCTTGCTCAGGTCGGCCAGTCGCATCCCTTGCGCCCTTCCCTCGGATAGCGCCACTATCTAAGCAGCATCACTTGGACA  
GTGCAGCTCGCCAACAGGGGGAGGCGTC

SCO5565 GCTCCCTACAGCGGACCAGGCAGTGGCCGCGCGCTCAGCTGAGACGCGTCAGCGCGAGACCTTGCCGGCCTTGATGCAC  
GAGGTGCAAGCGTTCACGCGCTTCGGCGTCCCGCTACCACGGTACGCACACGCTGGATGTTCCGGTTCCAGCGACGGG  
ACGTACGGCGGTGCGAGTGCGAGATGTTGTTGCCGAAGCCCGGCCCTTGCCACAGACGTCGCAGTTGGCAGCCACGGG  
TCACTCCAAGACTTCAGATGCACTTACGGTTGATCCCGGCATGCCGGGATCAAGGTCTCGGAATCGCGAACGGTCCGGG  
ATCTGAGTGGCGGTGCCAGGGGGATGGCCCGATCGGGATCGGGCAACCGGAGCAGCATAACAACGGCTGCTCCCGTACAA  
CGAAACTACCACGGCAGCTCAGGGCCCGTCCCGGCCCTTCCGGTGGGCGGCCCCCAAGGTCTACGCTGCCTGCC  
ACGTCCGCAGCTCAGGGAGGCGCAG

SCO5577 CGTCGGCGGCTCCGACCCTCGACTCCTCGCCGAGATGCGACGGCTCCAGCAGCGCGTCCAGGACCTGGAATCCGAACTC  
GGACGAATCCAGGCGGAGAACGACGCGCTGGCGGCTGCCGCTTCTCACGACAGGATCATGGAGAGCATGGAGAGCGTTG  
ACGCACACCAGGCGGAGCCTGCGCTCACCTGATCACTGCATCGCTCCACCACGGCACGGCAGTGGCCGGGCCCGCCCGT  
ACCACCGCTCAGGTGCCAGAGTCTGCAAGGGACGCTTCGGCGTCCCTTCTTTCTTTCCCGCCCCCGTCTCGCCGGTCCA  
GCCGTTTCGTACCGTCTCGGTGCCCGCCCCCGTCCGGTCCGTGCCCTCGGCCCGCCCCGTCCCTGCCCGCGCAACCTT  
TCACCCTCTTAACGTCTGATGTGCCCTGCACGTTACCGGCGAAACCGCGTCGGTTCACCGGTTCTGGAGTGAGACAG  
ACCCGAAAGGTAGAGTCCGACGGC

SCO5613 CGAAGGGGCCACCGTCGCCAGCGACGTGGTCTGGGGCCGGTACTCGAAATGGATTGAGGCGGGCGGCGTGGACTTCGT  
GAAGAAGGCCGACGACCGGGCTGGTAAGAGCCTGCTGGTCCGGATGCTCAAGACCTGGAGCATCGAGAACGGCACGCCT  
ATCGAGTCGTTCAAGTCGAGCAATACCCGCAAGCTGCGAGGGGTGCGCTTGAACGACTGACGCGAGCAGCCACGGGCGC  
GGGTGGAGCGGTCCGCCACCCGCGCCCCGGATGCATGTTCCGGTACTTGCCTCTCGCGCTAGGTACATAGGTACGCACT  
AGGTACGCTCCGGAGCCGCTTAGTGCCAAAAGGGGAAGCTAGGGCGATTCCGGTCTCGGGTGTACCTAGCCCGTACCTATGT  
ACCTTGTCTGGCGCGCAAGTACCCGACGCGGGGGTGGCTTGGCGGGTCTGAGGGGCGGGGCGACATCCACTCGGCCG  
GACCACCGACAGGGGAGAGGCAGAGCA



SCO5675 GTGACCCGAGGGGTAGTAGCCGACCGCGGGCGGCACCGCCGGGTGCCCGGGCGGTCCGTCCACTCCTTCAACGGGGC  
GACCAGCGCCGGCACCAGCACCATCGCCAGGGCCCCGGCCAGCGGCGGCAGCCACCACAGGCCACACCCGCGACCCG  
CCCGTGCCACGCCGCGTACGCCAGCGCCACGACCAGGACCGGCACCGCCACCTGCACGTTGCCGAGGTTCGGACAGCAG  
CTCGGAGAACCGGTTCGGGGTGGACGAGCGCCCCGCTCAGCCGCTCGTCCACCCCGACCAGGGGGCCGTTCGGCGACGAC  
CTGCCAGGTGATCAGCGCGAAGAGCAGCACGGGAAGCCCGACGAGGGCGGACAGGGCGCGAGGCGGGGCGGAGACCG  
GCATGACGCCAGCTTCGCAGGCCAGGCCTCGCGTAGTCTCACCGCCCGTGACGACCATAACGAACGGCACGGGACAGCC  
AGTGGGGAGAGACCTTCGCCCGGCTGAAGGCG

SCO5748 TCATGGCCGACCGGCTCGTGCCGCTGCTGCGGCAGCCACCCGTCCGGCCGGGATCCGGGGGCTGCTCCCCGGGATC  
AGTCCGGTGGTCATTCCGGCCGCCCTCCGATGCCCGCTCGTCTCCGTGCCACCGCCAGACCGGACGGACCGGTTTGG  
CTGGACAGCCGTATGCAAGTTACTTACCTTCGCCGTCCATCCGGATGCCGGTCTGCAGTGTTCGCCCCAGAGGGTGTG  
CGGACGATGTGCGAAGCTGCCGAAGTGTATGGCCTGGTTCGGCCGGGGTGAACAAGCTGGGCAAGCTGCTGATGAAGT  
ACGGGCAGGTGAATGCGCGCCGAGTCGGGTGGGCAGCAGCCCTGGAAGCGGTCCGGCGCGCCGGCCCGGATCACCCG  
GCAGTACGGAAGTACCGGCAGTACGGGAAGTAAGCGGCAGGAACCGGTCCGCCGAGTGTGGGCGGCCGGGCACAGCGG  
TATCGGTTCGACCCCTGCGGGAGGGACACA

SCO5765 AGGACGTTGATGAGCAGCCCGGTGAGCTGGTGGAAAGGCCAGCTGCCAGCTGGAAGGCGGCGATGAGCGCGAGGGCC  
AGCACCATGGCGCGCGGCAGCCAGCGCGGCATGCCGGCGCCCGGCCCCCGCCGCGGAACCGTGGGCCGGGGGGCCGGC  
GGGCGGCGCGGTGCCCGCCGGGGTGCCTGCCGGCGGCCTGCCCGTCTCGTCAGTGGATGCCACGGAGCAAGTCTC  
GCCACGCCACCGGCATGAGAGCCCGGTACGGCGATCTTCGTGAACCGTCACCGCTGTTCCCGCGGCACGTTTCATGACG  
GTGCACACCACGCGCCACACGTCTTCGCGTCCAGCCGGCGTCCAGCGCCTCGTGACCGTACGCCCGCCAGCTCCG  
TCATCACGTGATCCCGCGCGAAGGTGTCGGCGTACCCCGGACCGAAGTATCCGTCATCCGCTCCAGAAGACCGTCAAC  
CGCATGCCCCAGTATCCCGCCCCTGAGA

SCO5766 AAGGGCGCGGCGGTCGCCCGTCCCGGTCCGCACGGGTACCGGCAGGGCACCGTCCGGGGTGGACACGGCGGTTCAG  
ATAGCGGCAGACCCGTTTCGGCCCGCTGTCCGCGCAGCGGCCGACGGCGTCCAGGACGCGCAGCGCGTGCAGCGGTGTG  
CAGCGGCTGACTGGCCGGGCGCGCAGATCGGGCTCCAGGGCGTGGCCGTACCCGCGGTTCGTTGCGGTAGGCCTC  
CAGCGCGGTCTCACCGGGCCGGGGTCCCCGCCGCGAAGTCGTGCGCGAACAGCCGCTGCTCCAGTACGCGCGCGGT  
GAGCCAGACGAAGTGTCCGCGCGCGGAGCGGTGAGCGCGGGCCCTGGGCGCGGGGGGACGCGGGGCGGCGGGATC  
GCGGGGAGTGGGGACGCTCCGGTTTTCGGCCATGGGACAGACCGTAGGCCGAAAGGCGGTTCCGGCAGGTGGTCCCGGC  
TCGGGGGCCACTCTCAGGGGCGGGATACTGGGGG

SCO5767 GGGGACGCGGGCGGCGGGATCGCGGGGAGTGGGGACGCTCCGGTTTTCGGCCATGGGACAGACCGTAGGCCGAAAGGC  
GGTTCCGGCAGGTGGTCCCGGCTCGGGGGCCACTCTCAGGGGCGGGATACTGGGGGCATGCGGTTGACGGTCTTCTGG  
GAGCGGATGACGGATCACTTCGGTCCGGGGTACGCCGACACCTTCGCGCGGGATCACGTGATGACGGAGCTGGGCGGG  
CGTACGGTGCACGAGGCGCTGGACGCCGGCTGGGACGCGAAGGACGTGTGGCGCGTGGTGTGCACCGTCATGAACGTG  
CCGCGGGAACAGCGGTGACGGTTCACGAAGATCGCCGTACCGGGCTCTCATGCCGGTGGCGTGGGCGAGACTTGCTCCG  
TGGCATCCACTGACGAGACCGGGCAGGCCGCCCGGCACGCACCCCCGGCGGGCACCGCGCCGCCCGCGGCCCCCCG  
GCCACGGTTCGCGGGCGGGGCCGGGCGCCCGC

SCO5768 CCCGAGGACTCGGGGCCGTAGACCTCCACGACACGGCCACGCGGGATGCCTCCGACGCCGAGGGCCACGTGAGCGCG  
GTAGACCCGGTCCGGATGACCTCGATGGGCTCGTTGGTCCGGTCACCCATGCGCATGACCGCGCCCTTGCCGAATTGCC  
GTTCAATCTGTGCGAGCGCGGCGTCCAGGGCCTTCTCGCGGTCCGGTTCCTGCCATGGGTTCCACCCGGTTTGCTTGATTC  
GATCGTTACAGTCAAAGACGCTAATGCCTGCCACTGACAATGGGCCCCGATGCCGGTCCGGCCTGTGGATAACTCGGGT  
GCATCTCACCCCGAACCCACTCGAATCACCCGTACGAGCCCCGCCGGAGCCTCCATAAGAATGGATGTTTCGATTTTCGTG  
TCAAGCGCACCACGCGGCACTTCCGAGCGTACGTCCCCCGGGCGGCGAGCCAGGTGGTTGGATGCGGATGCGACACCG  
GGAGAGGTCGGAGAGGGGACGCAC

SCO5781 CCACCCGCTTGCCACGCAGGTCCCGCACCGACTGGATGTCCGAGTCGCTCGGCACGACGAGCTGCACGTAGTCGTCGTA  
GAGCCGGGTGACCCCGCGCAGCCCTTCGGCGCCCGGGCTGCCGGCCAGCTTGTACGTCTCGACCGCGTCGGCCGCGGC  
GATCGTGAAGTCGGCCTCCCCGGACGCCACCCGCTCGACGTTCTCCTGCGAGCCCGCGCTGGTCATCAGCCGCACGTCC  
AGGCCAGGCATGTCCTTGCGCAGCTCGGTGCGCAGCAGCTCGCCGTA CTTCTGGTAGACGCCCGCGCGGGTTCCGGTGC  
TGAACGTGATCGTCCCGCTCGGCGGCTTCTCGCCCAGCGGCAGCAGCCACCACAGCAGCAGCCCGAGCAGCAGCCGACC  
GGCGACCGTGCCCTGGACGGCCCGGCGCCTGCCGATACGGGAGAGCAGCGTGGACATGGGGGCGATCCTGCCAGCCCG  
CACCCGCACTGACCAGGGCCCACTGTCA

SCO5786 CCCAGGGGGCCCGCTTACGATGGTGTGCGGGTCTTCTGTGCCAGGCAGCCTCCGACGGCGATCTGCATGCCGGGGCG  
GCTCGCCTTCTTCGGGGCGAGGTGGCCGAGGTTGCCGTACAGCTTGTGTCGGCGTTCTCCCGTACGGCGCAGGTGTTG  
AAGACGACGACGTCGGCGTCGCCGTCCGACCCCTCGGGGGCGCGGACGTAACCCGCGTCCTCCAGCAGACCGGACAATC  
GCTCGGAGTCGTGGACGTTTCTGTCACCCGTAGGTGCGTACTTCGTAGGTGCGCGTGGCCCGCGTACTGGCTCCG  
GTCGATGCTGCTCATGGCACTAAGGGTAGGCGGTCACGATCGGGGGGAACGCCCGCACGCATCTTGACAGTACACCGCC  
AATCTCGATGTGATGCATGGGAGCGCTCCCATGCACCGTGCATGCCCGTCCCGGCCCATGCATGTGCTGACACACATC  
CCTTCTCCCGCACTGGAGGCACCCT

SCO5788 CGCCGAGATGGAGAACCAGATCCCCAAGGCGGTTCGTCCAGGAGCGCTACGAGCGCCTCGTCGCCCTCCAGGAGGAGATC  
TCCTGGGACGAGAACAAGAAGCAGGTTCGGCCGCACCCTGGAGCTGATGGTTCGCCGAGGGCGAGGGCCGCAAGGACGGC  
GCCACCCACCGTCTCTCCGGCCGCGCCCCGACAACCGCCTGGTGCACCTTACCAAGCCCGACCAGGAGGTCCGCCCCG  
GCGACGTGGTACCGTGGAGATCACCTACGCCGCCCCGACCACCTCCTCGCCGAGGGCGCCGTGCTCGACGTGCGCC  
GCACGCGCGCGGGCGACGCCTGGGAGAAGCGCAACACCGCCGAGCAGGCCAAGCCCGCGGGCGTGCTGCTGGGACTG  
CCGAAGATCGGCGTTCCCGAGCCCCAGCCGGTTCGTGGCGAGCGGCTGCGGCTGCGACTGACCGCGGGGGTACCGCCGG  
GGGGCGGCGACACGGGGATACGCTGCCGATC

SCO5949 CACGCCGAGGGCTTCGCCGCCTACGAGCACGCCACCCGTGACTTCGTGACCCTGAACCAGGACCTGGTTCGGCGAGGGCG  
GCGCCACCCTCTTCCCGACCACCGTCCAGGCCCTGGAACAGCGCAACGCCCGACTGCGCGCCCTCAGCGCCATGCCCGC  
CCCCGAACCCCGGCCGGCCACTCGGCCCTGACGCTGCCGTCTTCGGCGTCCGCTGACTCCGCTCGGTTCCACCAGCG  
CCGTTGCCCGAGCGGAAGGGCCCCGGTCACCCACCAGGGTGGCCGGGGCCGCGCCGACGGACCCGGCCCCGGTGA  
TGCCGTGAAAACCGCTGGAACAGCGCCGCCGTGTGTCACTACCGTGCCGCCGGAACAAGTCGCCAGGCAAGGACGTG  
CCGTTGTACACCCTGTGAGACCTCCCGAGTGCTGATCTGTGCGCGTTCGCACATGTGCCACGCGCTCCTTCCGCTGCGG  
TCTTCTCACTGGAACCGGTGTACCTCT

SCO6075 GCGCCAGCAGGTGCATGGCCCAGGCGTTGTGCTGATGCCGAAGCGTCCGGATCCGTCGAGGAGGGCGGCGGTGGCCG  
CGTAGGGGTCCTTGCCGTTCAGTTCGCGCAGGGTCAGGGCGGGGGCGCCGGCCGCTTCGCCGCGTCCGGGGCC  
TCGAGCGTCGGGACGACGAGCACGGGGTTCGCGGTCCGGGGCGAGGACGAGCAGCGTGAGCCGTTCCGGTGTCCGCCGTG  
GGCGCGTAGCCGGTGAGCCACACCAGGTCCGGGCCCGGGGCCACCAGCAGCCCGGCGAGGCCGGCGTCCGGCGCAGC  
CCGGGGCGGCGCTCCATACGGGCCCGGTAGTCGTGCGCGGTGAAGGAAGCGGCGGGGCTGCTGCCGGTCCATCCGGGC  
CTCCCGGGGCGGAAGAGTGGGCGGAGGAGTGAAGGGACCACGGGCAGCATCCTGCCCGCAGGACGGGGGCGACGCGA  
GCCGATTGGGATTGATCGACCCTGACGACTAATGG

SCO6137 CGGCCATGAACCCGACCAGCCCGATCGCACCCCTGGACCGAGCCGAGTCCGTCGACCTCGTAGTACCCGGAGGCGAAGAG  
GTTTCGTGATGACGGCCCCGAACAGTCCGAAGCCGATCAGCGTCCCCCAGCCCGCCTTGGCCGCGGCCCCGTCCAGGGCC  
ACGTCCAGGGCCTCCCGGCGCTCGGTCCGCCGCACCACCCAGGCGTACACGAACACCACCAGCGCCACCCGACGTGAGAC  
CGACCACCAGCGTGAGCCAGTCGTTGTCCTTACCGCCTGGACGGCGATGCCGCCGATGGCGTAGGCCACCAGCACGGC  
CAGGAAGTCCACACGAACCTCACGGGAACCTTCGTGCGGGCCCGTGGCTCGAGTGCCGCGGGCTGCACCCGGACGCTA  
CGGATCCGGCGGCCGGAGATCGTACCTCACGGTGGACACCTGTCTGTAGCTCGCTCGGGGGACAAGGGCCCCGTGGCC  
CGCCGGACAGGTCGTAGCCTCGTGCC

SCO6149 CTTTCATGTCGCACGGCATCACGCCCGCTTACCACCTGGTGCCCCGAGCCCACCACCCCGCTCGGCAAGACCAACCCCG  
ACGGCGCTCCGCTGGAGTACCACATCCGCCTGCTCCAGGCCTACCGCCAGACCATGGAGGACTACGGTCTCTCCTCGCCC  
CCCGGCTACGGCCCGCCGGCGCAGGCAACGCGGTCTTCTCGGTGAGTCTTTCATGGACAGCCTGCCGGAGGACGCGC  
CCGTGGAGGTGTGAGCGGACGGTTCGGGGTTTATTTCGGTGGCGCGGCCCTTCGGGCGCGCGACTAGGGTGACCGATGT  
CCGAGCGGCGGCCCAAGCGGCCGCGACAGGGGTCTTTCCGAGGAGGTGTGACCAATGGCTGTCACTGTGACGGGC  
GCTGCCCGCATCCAGGAGTCCATCGAGTCCACCTCCGCGGCCACCGGCTGATCTCAGCCGCTCCCTGAGTTCTCGCGCC  
GGGGCCGCACCCCGAAGGGTCACCCC

SCO6242 TCGCTCCGGCAAGCGCGGCTACGCCTTCCCTCCGGATCGCGACCGCCGAAGCCCCGTCATCTGGCTCCGTGCATGATCGG  
CCGGGCACGTATCGTTACCGAAACGGTCATGAGGTCTGCGGCTGCCGTCCGCGGAGCTGTTTCGGTCAGCCGCTCGACC  
GGCCCGGGCGAGGACACGGTCCGCGAGCGCTACCTCGCGGCCTTCGCGCGCGTCTGCCCGGCCTTTCCCCGGAGGAG  
CTGCGGTTCCGGATGCGGGGGATCCTCGCCGTGACGGCCGTGACCCGCTCGAGGTCCACCAGCAGCCCTCCCCGGGCT  
GCGCGTCCCCGGCAGCGGACGAGGCGGCCAGCGATGGGCGATCACGTTCCCTGACGGCAGCGATGAGTGCGCCACCGA  
CCCGGACCTGACGACCCAGGACAGACGCCGGCGGGGAGCGAGTGGGCCCGGGACGGCGCGTGCAGCGTTCCGCG  
CCCGGGCGCGCGGTCCATATGCTCGTCCC

SCO6250 CCTCGGTCATGCGGGCCGCGGCCGCTGCGAGGCCAGGAAGACGCCGCGGACGTTACCAGCCAGCAGCCGGTCGACGT  
CGGCGGGGGAGAGGCTCTCCAGCGGACCGAGCAGGCCACGGCCACGTTGTTGACCAGCACGTCCAGGCCGCGCCGA  
GCGCCGTGGCGGCCCGCTCGACCGCCCCCGCCGCTCGCCCGCGTCGGCGGAGTCGGCCCGCAGGGCGACCGCCCGG  
CGCCCCAGCGCCCCGACGGCCCGTACGACGTCTCGGCCGCGTCTCGCCGTTACGTAGGTGAGGGCCACGTCCGCG  
CCCTCCCCGGGCCAGCCGCAGGACGGTCGCCGCGCCGATGCCCGGCTGCCACCGGTACGAGGGCGGTACGGCCGGCC  
AGGGGAGCGGTGGTGGGGGCGAGTGGGTTGGTGTGCGTGTTTCGTGTTTCATGGGTCCATCCCAGCCGGGCCGCGTACC  
CGTGCTGGCGGTGAACGGACGTGACCTGAGCG

SCO6333 GACTGGCCCGCATGATGTCCACGGAGGAGATCGCCGCTGACCTGTACGTGTCGATCAACACGGTGAAGACCCATCTCAAG  
AGCGCCTACCGGAAGCTGGCGGTCAACCGGCGCGGGCGACGCGGTACGCCGGGCGCGCGACCTCGGTCTCCTGTGACCT  
CCCCCGCGAGGGGTGAGGCACGCGGGGCCACCGCGGGGGTGCATGGGAGGAACGTGATCCGGCGAGGTGAGACGAG  
GTGAAGCACCGGCGGGCCTTGGCAGTCTCGGTACGGCCAAATCCTGATGGTCTTGGACACCTCCACGATGAACGTGTC  
GATCAGCCAGTTGGTTCGAGGACTTCGACACCCGCGTGTCTTGCAGCGTTCGCGCTTGCAGTTCCTGGCCACCGCGCGT  
CTCCCGACCGCCCGGGCAGGCCAACCGCCCGAACCCGAACCTGCGTGCCGGGACCCGGAAAACCGGGCCGACCGGGCC  
GACGGGCTGAGCACGAAGGAGGCACAG

SCO6344 TGTGACCCGCCAGCCCTTGCCGTCGTCGTCCAGGTGGGCCACCGGGCGTCTCCGCCACTGCAGTTGCGCAGCCCCTTC  
GGGCCCTCGACGCTCGCCGGCTCCCACCTTGATCTGACCGCACTGCACCACGCGGTTGGCGCACTGGTCCTGTCGGCTCC  
CCGGCGAGACCACCCAGCCGTGGGCGCTCGCGGTGGGCGCCGGCAGACTCAGGGCCACCACGGGAGCGACCAGCGCTC  
CCTACTGCGGCGGCCACTCGTCTTTTCATGCGCATGACATCACATTTCCCTTCGGTCCACGTTCGGATCAGCCTGCCCCGGCT  
TACGACGGTGCCGATGAGGCAACCCCGCACCCGCAGGTCTAGACCTACGTGTGCAGGTCTAGACCTTAGCGAAGGAGTGG  
GGGGCGTCAAGGGGCGCACACCATCCCCGGCCCCGCGTGCAGGACAACCTGCCGTGACCGTGGGGCCTCTTGTGCCG  
GACGGCCCCGTGTAGTGGGGTTCGGCC

SCO6369 GGAGGTGACGGTCGGGGCGGTGGAGGCGTGGGCCGTGGCGATGGTGACGCTGTTACGCTTGTCCGTGAAGACGGTTCGT  
ACCGCCCTTGTTCGGTTCGGGGCCAGCCCTCCGGTACCTTACCGTGAACCCGGTGAAGCCGCCGGTGGGACGGTAGGCC  
ACGAACACCTGGTTGTTCGGGGATGTCACCGGGCGGGTTCGACTCGGTGGGGGCCGGGGTTCGCTGTGCCGGGGCCGTC  
GAACCCGAGCCGAATGCGCCCCGACGATGATCCGGAGCACCTGCGATCACCGTTCGCGACCACCGTCACTGCGACGA  
GTCCGGCGGAAGTACGTTTGTACGACATGCCATTGCCCTCCCGAGGAACTGCCGGGAACTGTTCCGCCGCCATGCCACCG  
ACGCTAGAGAGCCGTTCGGTTAACGCCCCGCACGCCGACGGTTAGACGACGGCAAAGCGCGTGGCGGACCGCCCGCGG  
ACCGGTTCGGGGGCCCGCAGGATGGGGC

SCO6387 ACTCGCCTTGCCTCATGCACTGGTCGAGTGGGTTACCACGCTCATCGTCACCCGAGGGTGACTGGCGCTGCAAGCTCCCG  
CCGCACCAACGCGCGCTCGTTGCTCTGGTGTACCTACGCAAGCACGACACCCTGGCGCCGGTTCGCCGCCGGCTTCGGCA  
TCTCGGTTCGGCACCGCCCACGCCTACACCACCGCCGTCATCGACCTCCTGGTTCAGCGATGTTGCCGCGGCCACCGGGG  
ATGCTTGTCTGCTGCGGTCCCCGAGCCCGAAGCCGCATCACCGCCAACGGGCCCGGCGGAGCCGTCCGACGAGGCCGAC  
ACCCCGCCCGCCGCCACGCGAAGCGGGTGTTCGAAGCGGTGTACGCGGTACCGGACACTGGCTGCTCGCTCAACTCGGT  
AGCCACGAGTCGGGCCTGAACCGCCGCACCGTGGGAAAGTACGCCCGGGCAGCCACCTGGCAGGAAGGCGTACGCCG  
GGTTCCGCCTCGTCGGCCTACGAGCC

SCO6390 TCCCCTCGGCTCCCGCGAAGATCACCTCTTCGGACTACCCGACGAAAACCTGGGTCAAGGGCGTGAGTCGGGGCGGGCAC  
CTTACGCTGACCCGCCCGCATCCACCACAACCTGGCTGGAGTGGTTCGCTGGACGGGGTGTTCGTGTACCAGTTGCTACC  
GGCGGCTCCGCTACGGACCTGAGTGAGCCTCTATCGTCCTCCGCGTTGCTCTGCCGCCGCCGCGGCTTCGCGGCCGCT  
CGGCAGGGCCAGCTGAGCACCCCAACGGGATGTTCGGCTCTTCATGGCCGATAACCCTGATGCCAAGCCCGTTCGGGGCC  
ACCCAGCCTGCGGTCTGGCGACACAGCGCCTCCCGGTGTTCGGCATTGCGCCCCAGCAGAGGGGCACCCTCGCCGATTC  
CGGAGAGTTCTGGGTTTCGGAGACACGCGCTTGGACCGGTCTCTGTAAAGCACAGAGTGGCCGTCCGAACGGCGGCAGA  
GTAGGAGATCTACGAAAATCACGGC

SCO6460 GCACGTGCTCTTCAACAACACTGCTGCGCGGACGCCGCCGTTGGAGCCGCCGAGAGCATGCGGCCGGCTGCTCACTCGGCCG  
TGTCGCTGATCCCCAGCCGCAGGTGCTCCACGTGGTACACGGCCTGGTCGAGCAGCCCGGCCACATGGTCGTCGTGCAG  
CGCGTACACCACCGAACGGCCACGTGCTCACCCACGACGAGGCCAGGTTGCGCAGCAGTCGCAGCTGGTGGGAGCAG  
GCGGACTGCTCCATGCCGACCTCCGCCGCCAACTCGGTGCGGGGCAGCGGGCCCTCGCGCAGCCGGGCCAGGATCAGC  
AGCCGGGAGGGGGTGGACAGGGCCTGGAGCGTGGTGGCGACCTTGGTGACGTTGTCCGCGTCCAGCCGCACGCGTGCG  
GCGGCGTCTCGCGCGGTGGTGGCGGCTCCGTGACCCATGCGGTTTCATCCTACTCACCACACATGAACACATGAATGAGTC  
TTCATCCGTTCTGTAAGGTGTGCCGC

SCO6513 GTCACCAGCCGCAAACCGGACGACCTCGAGGCGTTCTGCGAGACCTACCTCGCGCAGTTCGCCAAGGCGGCCGGCTGAG  
ACGGACAGGAACAGCGCGGACGACCGAGCGACGGGCGGACGGGCCACCGGCGAGGGATCGCCGGTGGCCCGCCGTGCG  
CGCTCAGCCACCGGGCGCGGGCCTGGCCGCAGCCGCGTTCGCCGGGCGCCCTCGCGGGTGCGGCCGGGGGCCACCG  
GGCGCCGGGGTTCGGCGCAGCCACTCGCCCTCAGCCGGGCCATGCGGTCGTTGTGGGCCCGCAGCGCGTCGTTCCG  
ACCCGTACAGCAGGGTGTGCTGGCGCGTGCAGTGGATGGTCTCCAGCTCTTTCATCAGCTGCTGGTTCGTCAGGCGGCC  
CGGGTCCACTCCGGTCATGGTGTGCTCCCGCGTGTGCTGTTTCGTTTCATGCGTCCCGGGTACCCGCCCGCAGCACTACCA  
CCCCGAGCGGCACCCGGGAGGGCAGCCAC

SCO6539 CGCGGCACCAGGCTCAGCACGCCCTCCGCGGCCGCCGCGGCCCGGGGCTCGCCGCCGCGGGAGTCGTCGTAGCGTTCC  
GCTTCCTTGTGTCGTAGTCGAGCACACCGTCAAGTGTGCCCGTGGCCGGCGGCCAGGTCTCCACCCTGCGGGCGAGCTCG  
ACGTCCTTCTCGGTGACGGCCCCGCCGCGCTGTGGGTGTGCACCGCGAGGGCGACCGTGTGGTAGCCGAGGGTTCAGG  
TCGGAGTGGTGGTTCGAGCTCCTCCTGCACCTGGGCGACGTGGACGACCATCGCGGCCGCCGGAAGTGCAGCCGAGC  
CGGTAGGAGCGGGTGCAGACGCCCGCGTGCAGGGACCGGGCAGGGTGGCCAGCCGCTCCTCCACCTCCTGCGGC  
GACAGCGGTTCCGGCGGGCATGGGCTGCGCTCCTCCTGGGCGGGTTCGCCTCAGCCTGCCACAGCACGGCCGCTCCG  
GCGCGCCCCGGCGTTCGACTACCGTTCCGGT

SCO6707 GGCGGTGATGATGAGCAGGACCATGAGGAATCCGGGGAAGGGATTGGTGTGTCGTCGGGATCCGGACTGATCGCGATGGCG  
ACGGAGAAGACGGCGATCTCCCCGACGACGTACGCACCCGCCAGCCACGGCTTCACCACGCCCTTGACCGCAGCCACCA  
CGAAGGGAACGGCGGCTGCGAGTCCCAAGGTGACGATCGGGACCAGCGTCCAGACCACCTTGCCAGGGCCGACGCGT  
ACATGCGGGGGCGCACTGGCGTAAGCGGTGCGTTGATGTAGGGGCTGGCCACGAGTTCTCCCGCTGTGTCGACGACGTG  
CAGGAATTGTGGTGCACGATGCCGGCCTGTCAGGCGATTTCAGCCGCCAGCAGATCGAGTGATCGAGACGGAGTGT  
CGTCATCGATCAAGCCGCGTGGGTCAGCCACCTGCCTGTGCGCCGGGATGTATGGGCGTTGCGCCCCGACAGGCGGGAT  
GCCGCCGACGGCGTACAGAATCGGACC

SCO6709 TCGAATCGCCTGACAGGCCGGCATCGTTGCACCACAATTCCTGCACGTCGTCGACACAGCGGGAGAACTCGTGGCCAGCC  
CCTACATCAACGCACCGCTTACGCCAGTGCGCCCCCGCATGTACGCGTCGGCCCTGGCCAAGGTGGTCTGGACGCTGGT  
CCCGATCGTCACCTTGGGACTCGCAGCCGCCGTTCCCTTCGTGGTGGCTGCGGTCAAGGGCGTGGTGAAGCCGTGGCTG  
GCGGGTGCGTACGTCGTCGGGGAGATCGCCGTCTTCTCCGTGCGCATCGCGATCAGTCCGGATCCCGACGACACCAATCC  
CTTCCCCGGATTCTCATGGTCTGCTCATCATCACCGCCGCCACACACACCGCCCTCCTCGACAACGACCGGATCAGTGT  
CGGAAGTAGGCGCTCCCGGCCCTACGACCGAGGTCTGCGCCCGCTTTCGAGCCGGGCAGCCGATATGCGAACCGAAGG  
CGCTGCGCCTACCGTGGCTCGC

SCO6740 GCGCGTACTCGGCGCCGGAGAAGCGGTAGGGGCCGATGCCGGGGTAGGCGTTCAGCTCCAGGTCGGCGTGTTCGGCG  
GTCTGCCAGGCGAAGTCCCGCCAGACGAAGTCGTGCGCGTCCCGCAGGATCACGGCGGTACCGCGCCGCAGGCCAGG  
TCGGCGCACTCGGGGCAGCCGTAGATGACGTACCGGCCGCCGGGCAGGGGCGCGTCCGGCCTCCAGGAGCAGGCAGCG  
GACCTGCGCGGTGAAGATGGCGGGCGGTACGTGCGAGGCGAGCGGGGAGACGGCGTCCAGATCGGAGAGCCGGAACAG  
GAGGGGGCGTCCGTGACGACGAAGTCCATGAAGTCGCGGTGGACCTGGAAGTCGCCGTCCGGCGTGGACTCCGCCGGC  
GCGCGTCCCGGGGCCAGACCGAAGGTGCGTACTCGGCAGCCATGCGGTGAGTATTCCCTCGGCCGGGCCTCTTGAG  
CACGCCGTCCGGCGTTCGGTTAACGTCCTGGT

SCO6747 GGAGGAGGACCTGGGCCGGGACGTCGCGCTGACCGTCGCCCGGCACCTGGTGGTGTTCCTGCGCCGGCCCGGGAACCA  
GGCCCAGTTCAGCGCCCAGCTCGCCGCCAGACCGCCCGACGCGAGCCGCTGCGGGAGCTGCAGCACTGGATCACCGA  
GCACCCCGGCACGACCTGAGCGTCGAGTCCCTCGCCGCCCGCGCCAGCCTCTCCCCGCGCCACTTCGCCCGCGCCTTC  
CAGGCGGAGACCGGCACGACGCCGGGCCGCTACGTGACCGGGTCCGGCTGGAGCACGCCCGCCGGCTCCTGGAGGAC  
ACCGGCGACGGAGTCGAGGAGGTCTCCCGCGCCAGCGGCTACGGCACGCCGGAGGCCATGCGCCGTGCCTTCGTCAAG  
GCGCTCGGCACCTACCGGCGGAGTACCGCCGCCGTTCCGGCCCGCGCCGGTCTCCTGACGCACCGGGACACCCACC  
CGCCGCACCACCGAACCGAAAGAGGCAGCAC

SCO6748 GTGCGGCCGTGGTTCGGTCTCCAGGGCGGTGCGGGCGGTAGGGGTGGTTCCTCCACGGCCACCCGCACCCACTCGGGC  
CCGACGGCGACCTCCACGGCGAGCACCGGGGAGAGCACCGCCGCGTGCCGGACCGCGTTCGTGACCAGTTCGAGACG  
ATCAGCAGCAGGGTCTGCGTCACGTCGTGCGAGACCGGCACGCCCTGGCGCACCCAGCAGGTCGCGCACGGCGTGCCGG  
GCCTGCGGGACCGAGGCGTCCACGGCGGGGGCGGTGAACCGCCAGACGCCTTCGTACGGCAGCGGCCCGGGCGGGCCC  
GGTCTCGTCCATCGTCCGGTCCGACCCCTGGGCTCGATTGTACCCACACCCCTGAGTGTGGTAACGCACCGTGCCGCC  
CCCATGGACTGAACACAAGTCAGCATGTATCGAGCGGTTTCTGACCGTTGGCGCATGAGACGCGACCGTTCCTGTGCGCGC  
CCGCCCGGCCGCTCGAGGCGGAGAGGCCG

SCO6793 GACCGATAAGCCGGATACGCAACCGTTCCGGCATGGCCGCGAAGCAGTCGGACTCGATCAGAAACGGTCACCGTCCGGTG  
ACGGTCTACGGGGAGCCGGAGGTACCCCGTCGCGCATCAGGGACCGCGCGGCCCGCCGCGCGGGCCTCCGGGTCTGAAG  
CGGTCCGCGTGCCGGGTCGTCCGCGTGGCGCCACAGGGGCACGGAGCCTGAGCGGGGCGCAGCAGGCCGGGTGTGGT  
CCACAGCCAGAGCCCGAACGCCCCCTCGACGTGCCGCAAGTTCCTGCGCCGGGCCGTCTGTGAGGGCGCGAACCCAGGC  
GGTGGCCGTCACGGCGGCTTCTCCCGGGAGACGGAGTTGTACCTGCGGGGCGCACATACGTGCACCATGCCAGGTTTC  
TCGTCGGTCGCGATGCGGCCCGGCGAGTATCGACGAACCCATTGACGCCCTCACGCCCCCGTGAAACAAGTATATGGAT  
TTTGTATCTTCGACTCGCTGGGGGCCCG

SCO7254 CGCACGGCACCCCGAGGCGGTGTGGCAGGCGGTGCGGCCCGTGCTCGAGAAGGAGGCGCGCGGATCGGTTCGAGGCG  
GTGGCCAGGGAACTGGACGCGGCCCGCGGCCGCAAGGACTTCGCGGCCGGGGTTCGACGAGCTGTGGGAGAGCGCCAC  
ACGGGCCGTGTCCGGCTGCTGGCCGTCGAGGAGAACTTCAAGGTGACGATGCGCGACGACGGCGAGCATCTGCTCCCGG  
CCGACGACGGCGACCTCGACGCCCGGGAGGACATCGTGGACGAGATCGTGAACAGTGCCTGGAGACCCGGCGCCGACG  
TCCGTTTTCGTGCCGGACGGCGCGCTCGGGGACGTGGACGGCATCGCGGGGGTACTCCGCTACTGACGCCGGCCCGCCG  
ACCCGCGGACCCGGCCCGCCCGGCCCTTTGACGCGCGTGAAAGCCTGTTCCGCGTACACGTACCCGCTGCCGGCGGGT  
GCGCGGGCGACGACGAAGGAGCGGGCGCGGC

SCO7255 CCGACGACCCCGACCGCCCCACCGCCGCCAGGTCACCGCGTCCCTCGACCGGCTGCGCGCCCGGTACGAGGACGTCT  
CGCCGGTCTTCGGCCGGTACCCGGCTACCCAGGTGCTCATGTGCTACGGCAGGCCAGGGGAACGGACTACATCCGGGA  
CGACGTGAAGGACCTCGACACCGCGAGGATGCTCCTGGTCGGCACCCGCGGGCAGCCCGGCCACGCCGTACCGCTGGAC  
GACGGAGACTGCGGACCGGCTCGGCCCTCCGCCGTGGTCTGACAAACCGGGGCGAGGGGCACACCCGGCTACGCGTC  
GTCCAAGTGCGTGACCGCAAAGTCGACGACTTCTGCTGTACGGTCCCTGCCGCCGACGGCAGCTCCTGCGGTCCC  
GAGTCCACCGGCGACGGGTCCGGCTGAGCGGCGACGGGCCGACCGAGCCATGGTCCGCCCGAATGCCCGATATGCC  
TTATATACCGGTGGAGCATATCGTGCTGAC

SCO7256 CGACGCCCCCGGCTCGCCGGAGTCGGCGCAGCCGTTGCCCGCGGCCGGGTTGAGGAGCCCCACCACGTTACGGTGTT  
GCCGCACACGTGACCCGGCACGTCCACCGGGAGCTGCACGGTGTGCGGAGATCAGCCCGGGCGAACCCGGCCGCGGA  
TCCCTCGGCGCCGGCCCGTCCGACGCGAACGCCGCGTACGCCGGCATCGTCACGGCCAGCGCGCCTGAGGCGGGCGAC  
GGCGAGCACACCGTTTTCGGGTAACCCTTCTCATGAGGCTCCCTGCCTTCCAGACATGGTCGCGGGCAGTCGCCCGCACCG  
TCTAAAACGCGGGCGCACCATCCGAGTTATGGCTTATCGGTCTTTACCCCATCGAGTGGGCGGTTTCATCGAACAAAGCGG  
CGCACGGCCCCGTGCGTTGCCGCCCGGAGGCGCCGGGTGCGCGGCCCGCTTATGGTGAGCGAGGGCGCCGTCCACCG  
GTCCGCGACGGGGCGCCCGGGAGGCATCG



SCO7380 CGGCGAGAGGATCGCCGGCGTTCCCGACCGCCGAGGGGCGCCTCGTCCTCCTCAGCCGGCCGCGTTGTCGGTGCGCAG  
CCTCACCTGTTCTCCAGCCGCCGAGGCTGCCGTGAGGGCCTCGGCGACCGTCCGCCGGCCCGGGTTCGTGGGTGTC  
GTCGAAGAACGACAGGTGCACCGTGACCTCGCTGGCCCCGCTGTGAGCCCGGCGACCTGCAGCCAGCCGGCGTAGCTG  
CCCTGTTTCGCGGGTGCCCCACTCGAGCCGCAGCTGCTCGGGCCGGGCGCTCAGCAGCGCCGAGGTGTCCTGGTTCGGTG  
CGGTCTCGTGCACGGTGACGGCGGGCGGTTCTCCGGTCCACGTGCAGGTCCCGGGGAGCCAGGTGCCAGCTGT  
CCCACGTTTCGCGGCCTGGTCAAGACCTGCTCGGGCTGGGCGGGCATGGTGCGGGAACGCTCGTACTCGGTTCATGCGGC  
ACCACTCCTCGGCGCTCGGGGTCGTACGAG

SCO7389 CTACACCCACGTCCCGCACGACATCCCGCGCCGACGCGGGGCGAGGAGGGCATACCGGCACCTGGGACACCGGGGAGCG  
GGAAGTATGGCCGACCGGGTTCGAACGCCAGGTGGAACGCTTCGCGCCCGGCTTCGGGGTCTGATACGGGCCCGCCG  
CGTGCTCGCCCCGCCGACGCTCCAGGCCCTGGACGCCAACCTGGAGGGTGGTGCCATCAACGGCGGCACCACCGCCATG  
CACCAGCAACTCGTCTTCGGCCCGTGCCCGGCACCGGGCGGCCCGAGACCCCGGTGGCCGGTCTCTTCCTCGCCTCCG  
CGGGCGCCACCCCGGGGGCGGCGTGACGGGGCGCCCGGTGCCAACGCCGCGCGCGCCGCACTGCGCCAGCACCGG  
TTCGCGGGCCTCGCCCGGATCCAGCGGGCCCTGACCCGGCGGGACCGGGCGGGTGACCGGCACTGACCGTTCGCGACCG  
TACGCCAAGTACCCGAGGAAAGGGCCGACCG

SCO7394 ACGTCGGCCCTGGTCTCGCCGGCGCCGATGGTGCCCTGGCAGTTCTTCTCCTGATCGACCGAGACGTTCGATGGTGACGG  
TGCTGCCGTCTCCAACCGGGTGTGCGCCCTTACGTGCACGGACTTCGCTGCCGGGTGGCCTCGACCGCCTTCGCGGC  
GATGTCGTGCGCGCTCTGCCCTCGAACGGCTTGCCCTCGTACCCGAATCGCCGCCGAGCCGGCCAGTAGGGCGACG  
GACACGCTCGCGGTGCGCCACAGCGGTTGCCACTTTGCCGGTACGCACTGGAAAGTCTCCCAAGTCTGTTTCATAACCGT  
CAAATCCCTTGCTGTCCCGATGTGTTGGCATCGGAACCTTCGACTACCCGCGATCGACGGGACATGCACGTGATGGAGA  
ATCCGTGACGGGCGGGTGAGCGGTCCCGGTGTGGATTGGTCCCGACAGCGCACGCGAAGTGGACCCCGTGACGGGC  
CGCCACGCTCTCTAGCGTCGTGGCC

SCO7434 CCCACCGTCGACGGCGAATGGGACGGCGTGACCCGCATGCTGCGCGCCGTCGGCCTCAACCCCGGGTGGTGCACGGC  
GACTACCACACGGCCGCTCCCTGGTGCACCCGGCGAGGTGTCACGGTCTGCCAGCCAGTTCAGTCCCGCCCCG  
ACACGGCGGTGCGGGCGCCTGTACGGCGACCCCTCGGCGTACGCCTGCTGCTGGCCGCCCGCACCCGGGCCGAGCTGG  
ACGCCGTCTTCCCCGCCCTGGAGGACGCGTACTGGGAGGCCGCCCGCCAGTCCACCGCGTACCGGGAGTGGCTGGAAG  
GGGGCGGGATCCGGACGCTGCCCGGTGCCCGGTGGCCGCCACGGGAGGCCGGCGGGTGGAGTTCGTGCGGGGCGCGC  
TGAAGGCTCCCGGTCCCGCCGCCACGGGACGTGCCCCACCCGGCCAATAGGGTGATTTTCATACCGGTCCGGTGTG  
TCTGCGTGACGGAGCGGTTACGGACAGCATC

SCO7450 CACGACGAGCCCCGTGGCGGCATGCACACCGGCGGGCGGCGCTGGCCGCGGTGAACGAGGGCGACTGGGACGGCGG  
CGGCCGCGAGTCCAAGGAGGGCGGCTCGCAGACCTACCAGCAGGACGAGGGCGAGAGCTCCAGGGGCGGCGGTGAGCA  
CGAGAAGCCGCGCGGGCGGGATGCACACCGGCGGTGGCGGACTTGCCACGCCGACCACGACCGCGGGCGGGCTCGCCG  
TCCTGGCCGTCGCCGCGACCGGCCTGTACGCCGTCCGACGCAAGAAGTCGGCTCACGGAGTGGCGTAAGCCGTGCCGG  
GCGCCATAGCAGCCGGGCCGCCACCCAGGAACCACGGGGCGGCCCGGCTCGCCCCGCCACCCCGCCGCCCTCGTG  
TCCGTCCTGCCGCCGTGTCCCAGTGAGGTCGTCCCCGATGTCAGTCACCCCTCCCACCCCGCCCCGGCCGACGACGAG  
ACGACGACCGGTCAGGGCTCCCGCTCCGGCCTG

SCO7451 GGCCGGCGACACCAACCTCGTCGGCTGGTACGCCAAGGGCGTCTCGCCCGGCGAGAAGGGCACCTCGATCATCGCCGG  
GCACGTGGACACCAAGACGTCGGCCGCGTCTTCGCCCGCCTCGACCAGCTCGACAAGGGCGACAAGTTCCAGGTCCGG  
CGCGCGGACGGGCGCAGCGCCACCTTCGTGGTCGACGGCCTGGAGACCTTCGCCAAGGACGAGTTCCCGAGCGACCGC  
GTCTACGGCGACGCCGACCGGCCCGAGGTGCGACTGATCACCTGCGCGGGCGACTACGACCACAAGGTCAAGGACTACA  
CGGACAACCTGGTCGTCTTCGCGCACCTCGCCTGAGGCCGCGCACCGGGCCGGCCGCGGCCGGTACCCGCGCACCC  
GCACACGGGTGCGCGACGGCGGGGCCCGGCACAGGATCGAGGCAAGCCGGCGTCGCATCACCGCGGGCCGACGTTCCAG  
TTCCGCCCCCGCGAAGGAGATGTGCGCAGG

---
