# Supplementary material for: Genome-wide identification and evaluation of constitutive promoters in streptomycetes
Source: PubMed Central journal article supplement (PMC4625935; doi:10.1186/s12934-015-0351-0), 2015-10-29
Supplement: 12934_2015_351_MOESM6_ESM.pdf [file 12934_2015_351_MOESM6_ESM.pdf]

**Additional file 6: Figure S1**

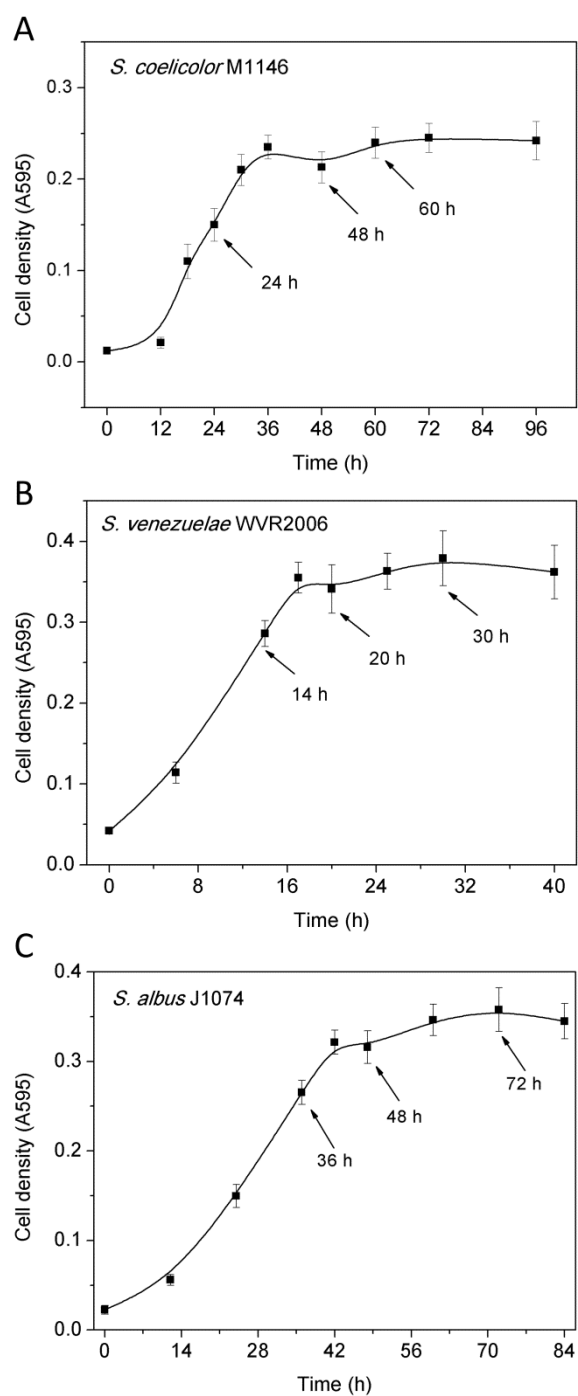

**Figure S1** Growth curves of *S. coelicolor* M1146, *S. venezuelae* WVR2006, and *S. albus* J1074.

Cell growth was monitored by using the diphenylamine colorimetric method[1]. For growth quantification, cell pellets were harvested from 1 ml cultures by centrifugation

at  $10,000 \times g$  at room temperature for 10 min and washed twice with the appropriate buffer. The cell pellets were then resuspended with 2 ml diphenylamine reagent and incubated at 60 °C for 1 h. After centrifugation, the supernatants were transferred to 96-well microtiter plate and measured at 595 nm by a multifunctional microtiter plate reader (Synergy Hybrid Reader, BioTek, USA).

#### Reference

1. Zhao Y, Xiang S, Dai X, Yang K. A simplified diphenylamine colorimetric method for growth quantification. *Appl Microbiol Biotechnol.* 2013;97:5069-77.
