# Supplementary material for: Genome-wide identification and evaluation of constitutive promoters in streptomycetes
Source: PubMed Central journal article supplement (PMC4625935; doi:10.1186/s12934-015-0351-0), 2015-10-29
Supplement: 12934_2015_351_MOESM7_ESM.pdf [file 12934_2015_351_MOESM7_ESM.pdf]

Table S3 Primers used in this work

| Primer name                    | Sequence (5'–3')                                                     |
|--------------------------------|----------------------------------------------------------------------|
| <b>For strain construction</b> |                                                                      |
| ermEF                          | CGACAAAACCTTTAGATCCTCGAGATCTGATATCGGAGACCAGAGCGAG<br>TGTCCGTTTCGAGTG |
| ermER                          | AGCTCTTCGCCTTTACGCATGAGACCATCCTACCAACCGGCACGGTTG<br>TG               |
| 4503F                          | ACAAAACCTTTAGATCCTCGAGATCTGATATCCCTCGCCGAGCGGGAGG                    |
| 4503R                          | AGTGAACAGCTCTTCGCCTTTACGCATGGGCGGCTCCTGGGACGTG                       |
| 4508F                          | ACTTTAGATCCTCGAGATCTGATATCAGGCCGTCGAGGGTGTCCCTTG                     |
| 4508R                          | AGTGAACAGCTCTTCGCCTTTACGCATGCTTGTCTCCCCAGGCGAG                       |
| 6740F                          | ACTTTAGATCCTCGAGATCTGATATCGCGCGGTA CT CGGCGCCGGAG                    |
| 6740R                          | AGTGAACAGCTCTTCGCCTTTACGCATACCAGGACGTTAACCGAAC                       |
| 3410F                          | ACTTTAGATCCTCGAGATCTGATATCCGCCTGGACCGCCGCCTGTT                       |
| 3410R                          | AGTGAACAGCTCTTCGCCTTTACGCATTCCCTCCTGTTGACCTCAGTA                     |
| 4658F                          | ACTTTAGATCCTCGAGATCTGATATCGCGCCGGGTAGAGCGGGAAAG                      |
| 4658R                          | AGTGAACAGCTCTTCGCCTTTACGCATCGCGCCTCCCTCCTCATGACC<br>TTG              |
| 2468F                          | ACTTTAGATCCTCGAGATCTGATATCCGCGCGCACGGCGGGCGGCATC                     |
| 2468R                          | AGTGAACAGCTCTTCGCCTTTACGCATGCGTGAAGTCTACGGGGGCG<br>GAC               |
| 2074F                          | ACTTTAGATCCTCGAGATCTGATATCGCTGTTCCCAAGGCCCGCGGCA<br>CC               |
| 2074R                          | AGTGAACAGCTCTTCGCCTTTACGCATGTGAGTCCCTCAGCCTAGGTC                     |
| 5768F                          | ACTTTAGATCCTCGAGATCTGATATCCCCGAGGACTCGGGGCCGTAG                      |
| 5768R                          | AGTGAACAGCTCTTCGCCTTTACGCATGTGCGTCCCCTCTCCGACCT                      |
| gfp-cx-R                       | AGAGGTACGGGCTGCAGCCGGGCCTGGCTCATCATTTGTACAG                          |
| LNf                            | CCGTA CTGACGGACACACCGAACGCCAAAGACCACCGGAAGGGAC                       |
| LNR                            | GTCCCTTCCGGTGGTCTTTGGCGTTCGGTGTGTCCGTCAGTACGG                        |
| IJF                            | ATGCGTAAAGGCGAAGAGCTGTTT                                             |
| IJR                            | CGATATCAGATCTCGAGGATCTAAAG                                           |
| LN0F                           | GCCAGGCCCGGCTGCAGCCCGTAC                                             |
| LN0R                           | GAGACCATCCTACCAACCGGCACGG                                            |
| JF                             | CCGTGCCGGTTGGTAGGATGGTCTCATGCGCAAGGTGCTCATCGCCA<br>AC                |
| JR                             | GTACGGGCTGCAGCCGGGCCTGGCCGTCCGCGATCCGGAACATCTCC<br>C                 |
| 6740R1                         | TGGCGATGAGCACCTTGCGCATGAGACCACCAGGACGTTAACCGAAC<br>GCCCGAC           |
| 5768R1                         | TGGCGATGAGCACCTTGCGCATGAGACCGTGCGTCCCCTCTCCGACC<br>TCTC              |

2074R1 TGGCGATGAGCACCTTGCGCATGAGACCGTGAGTCCCTCAGCCTAGG  
TCCTTGAC  
2468R1 TGGCGATGAGCACCTTGCGCATGAGACCGCGTGAAGTCTACGGGGGC  
GGACCGAC

**For real-time RT-qPCR**

gfp-F GGGTGAAGGTGACGCAACTAATG  
gfp-R CGGATAACGAGCAAAGCACTGA  
hrdB-F-sc GAGGACGGCGACAGCGAGTT  
hrdB-R-sc GACGCCGTACACCTTGCCGA  
hrdB-F-sv GCCGAGTCCGAGTCTGTGA  
hrdB-R-sv CTGGGTTGGCGGAATCTGGT  
hrdB-F-sa AGGCCCGCACCATCCGTATC  
hrdB-R-sa GGGTCATGTGCGAGTTCCTTGGC

---
